# Supplementary material
Source: publisher figshare collection journal article supplement (https://acs.figshare.com/ndownloader/files/5740650)
Supplement: Supplementary file 1 [file 5740650]

#\#CIF_1.1
 
#  CIF produced by WinGX routine CIF_UPDATE
#  Created on 2015-07-23 at 14:27:20
#  Using CIFtbx version 2.6.2 16 Jun 1998
 
#  Dictionary name : cif_core.dic
#  Dictionary vers : 2.4
#  Request file    : c:\wingx\files\archive.reqdat
#  CIF files read  : mn2_020b_0m apexiitemplate
 
#------------------ SECTION 1. GLOBAL INFORMATION ---------------------------#
 
data_global
 
#------------------ AUDIT DETAILS -------------------------------------------#
 
_audit_creation_date            2015-07-23
_audit_creation_method          'WinGX routine CIF_UPDATE'
_audit_conform_dict_name        cif_core.dic
_audit_conform_dict_version     2.4
_audit_conform_dict_location    ftp://ftp.iucr.org/pub/cif_core.dic
_audit_update_record            ?
 
#------------------ AUTHOR DETAILS -------------------------------------------#
 
# Name and address of author for correspondence
 
_publ_contact_author_name      'Werner Kaminsky'
_publ_contact_author_address
;
Department of Chemistry
University of Washington
Seattle
Washington, 98195, USA
;
_publ_contact_author_email       kaminsky@chem.washington.edu
_publ_contact_author_fax         '00(206)6858665'
_publ_contact_author_phone       '00(206)5437585'
 
 
_publ_requested_journal 'Journal title here'
_publ_section_title
;
title here
;
 
loop_
_publ_author_name
_publ_author_address
'Michael Norris'
;
Department of Chemistry Univ. of Washington Seattle, WA 98195 USA
;  
'Sarah Flowers'
;
Department of Chemistry Univ. of Washington Seattle, WA 98195 USA
;
'Werner Kaminsky'
;
Department of Chemistry Univ. of Washington Seattle, WA 98195 USA
;
'Brandi Cossairt'
;
Department of Chemistry Univ. of Washington Seattle, WA 98195 USA
;
 
_publ_section_abstract
;
Abstract here
;
_publ_section_comment
;
Details and comments here
;
 
_publ_section_exptl_prep
;
details of preparation here
;
 
_publ_section_exptl_refinement
;
 All H atoms were initially located in a difference Fourier map and were
 refined with a riding  model. H atoms were placed in geometrically
 idealised positions and constrained to ride on their parent atoms with
 C---H distances in the range 0.95-1.00 \%A. U~iso~ values were fixed
 such that they were 1.2U~eq~ of their parent atom U~eq~ for CH's and
 1.5U~eq~ of their parent atom U~eq~ in case of methyl groups.
;
 
 
# Insert blank lines between references
 
_publ_section_references
;
 
 
Bruker (2007) APEX2 (Version 2.1-4), SAINT (version 7.34A), SADABS
(version 2007/4), BrukerAXS Inc, Madison, Wisconsin, USA.
 
Flack H. D. & Bernardinelli, G. (71999). Acta Cryst. A55, 908-915.
 
Flack H. D. & Bernardinelli, G. (2000). J. Appl. Cryst. 33, 1143-1148.
 
Cambridge Structural Database: Allen, F. R. (2002). Acta Cryst. B58, 380-388.
 
CrysAlis CCD, CrysAlis RED and associated programs: Oxford Diffraction (2006).
Program name(s). Oxford Diffraction Ltd, Abingdon, England.
 
COLLECT: Nonius [or Hooft, R. W. W.] (1998). COLLECT. Nonius BV, Delft,
The Netherlands.
 
DENZO/SCALEPACK:  Otwinowski, Z. & Minor, W. (1997). Methods in Enzymology,
Vol. 276, Macromolecular Crystallography, Part A, edited by C. W. Carter Jr
& R. M. Sweet, pp. 307-326. New York: Academic Press.
 
DIRDIF99: Beurskens, P.T., Beurskens, G., de Gelder, R., Garci\'ia-Granda,
S., Gould, R.O., Israel, R. & Smits, J.M.M. (1999) The DIRDIF-99 program
system, Technical Report of the Crystallography Laboratory, University of
Nijmegen, The Netherlands.
 
ORTEP-3: Farrugia, L. J. (1997). J. Appl. Cryst. 30, 565.
 
PARST: Nardelli, M. (1995). J. Appl. Cryst. 28, 659.
 
PLATON: Spek, A. L. (2003). J. Appl. Cryst. 36, 7-13.
 
publCIF: Westrip, S. P. (2008). publCIF. In preparation.
 
SADABS, TWINABS: Bruker (2001). Program name. Bruker AXS Inc., Madison,
Wisconsin, USA. or Sheldrick, G. M. (1996). Program name. University of
G�ttingen, Germany.
 
SHELX Sheldrick, G. M. (2008). Acta Cryst. A64, 112-122.
 
SIR97: Altomare, A., Burla, M. C., Camalli, M., Cascarano, G. L.,
Giacovazzo, C., Guagliardi, A., Moliterni, A. G. G., Polidori, G. &
Spagna, R. (1999). J. Appl. Cryst. 32, 115-119.
 
SIR2002: Burla, M. C., Camalli, M., Carrozzini, B., Cascarano, G. L.,
Giacovazzo, C., Polidori, G. & Spagna, R. (2003). J. Appl. Cryst. 36, 1103.
 
WinGX: Farrugia, L. J. (1999). J. Appl. Cryst. 32, 837-838.
;
 
#------------------  SECTION 2. COMPOUND(S) DETAILS -------------------------#
 
data_mn2_020b_0m
 
_audit_creation_date                    2015-07-23T14:27:20-00:00
_audit_creation_method                  'WinGX routine CIF_UPDATE'
_audit_conform_dict_name                cif_core.dic
_audit_conform_dict_version             2.4
_audit_conform_dict_location            ftp://ftp.iucr.org/pub/cif_core.dic
_publ_requested_category                FM
 
#----------------------------------------------------------------------------#
#                   CHEMICAL INFORMATION                                     #
#----------------------------------------------------------------------------#
 
_chemical_name_systematic
;
 mn2_020
;
_chemical_name_common                   mn2_020
_chemical_formula_moiety                'C34 H31 Cl N6 P Ru, Cl'
_chemical_formula_sum                   'C68 H62 Cl4 N12 P2 Ru2'
_chemical_formula_weight                1453.18
 
#----------------------------------------------------------------------------#
#                   UNIT CELL INFORMATION                                    #
#----------------------------------------------------------------------------#
 
_symmetry_cell_setting                  monoclinic
_symmetry_space_group_name_H-M          'P 21/n'
_symmetry_space_group_name_Hall         '-P 2yn'
_symmetry_Int_Tables_number             14
loop_
    _symmetry_equiv_pos_as_xyz
'x, y, z'
'-x+1/2, y+1/2, -z+1/2'
'-x, -y, -z'
'x-1/2, -y-1/2, z-1/2'
 
 
 
_cell_length_a                          25.6189(16)
_cell_length_b                          11.1698(6)
_cell_length_c                          26.1500(16)
_cell_angle_alpha                       90
_cell_angle_beta                        110.045(3)
_cell_angle_gamma                       90
_cell_volume                            7029.7(7)
_cell_formula_units_Z                   4
_cell_measurement_temperature           100(2)
_cell_measurement_reflns_used           526
_cell_measurement_theta_min             3
_cell_measurement_theta_max             20
 
#----------------------------------------------------------------------------#
#                   CRYSTAL INFORMATION                                      #
#----------------------------------------------------------------------------#
 
_exptl_crystal_description              prism
_exptl_crystal_colour                   orange
_exptl_crystal_size_max                 0.53
_exptl_crystal_size_mid                 0.06
_exptl_crystal_size_min                 0.01
_exptl_crystal_density_diffrn           1.373
_exptl_crystal_density_method           'not measured'
_exptl_crystal_F_000                    2960
_exptl_special_details
;
 240 seconds, 1 degree, 40 mm
 disordered mixture of DCM/Acetone and possibly n-Bu4NCl
 squeezed out
;
 
#----------------------------------------------------------------------------#
#                   ABSORPTION CORRECTION                                    #
#----------------------------------------------------------------------------#
 
_exptl_absorpt_coefficient_mu           0.675
_exptl_absorpt_correction_type          multi-scan
_exptl_absorpt_process_details          '(SADABS; Bruker, 2007)'
_exptl_absorpt_correction_T_min         0.7161
_exptl_absorpt_correction_T_max         0.9933
 
#----------------------------------------------------------------------------#
#                   DATA COLLECTION                                          #
#----------------------------------------------------------------------------#
 
_diffrn_ambient_temperature             100(2)
_diffrn_radiation_wavelength            0.71073
_diffrn_radiation_type                  MoK\a
_diffrn_source                          'fine-focus sealed tube'
_diffrn_radiation_monochromator         graphite
_diffrn_measurement_device_type         'Bruker APEXII CCD area-detector'
_diffrn_measurement_method              '\f and \w scans'
_diffrn_reflns_av_R_equivalents         0.0732
_diffrn_reflns_av_unetI/netI            0.0928
_diffrn_reflns_number                   55294
_diffrn_reflns_limit_h_min              -29
_diffrn_reflns_limit_h_max              30
_diffrn_reflns_limit_k_min              -13
_diffrn_reflns_limit_k_max              13
_diffrn_reflns_limit_l_min              -29
_diffrn_reflns_limit_l_max              32
_diffrn_reflns_theta_min                1.69
_diffrn_reflns_theta_max                25.86
_diffrn_reflns_theta_full               25
_diffrn_measured_fraction_theta_full
                                        0.961
_diffrn_measured_fraction_theta_max
                                        0.915
_reflns_number_total                    12455
_reflns_number_gt                       8644
_reflns_threshold_expression            >2\s(I)
 
#----------------------------------------------------------------------------#
#                   COMPUTER PROGRAMS USED                                   #
#----------------------------------------------------------------------------#
 
_computing_data_collection              'APEX2 (Bruker, 2007)'
_computing_cell_refinement              'SAINT (Bruker, 2007)'
_computing_data_reduction               'SAINT (Bruker, 2007)'
_computing_structure_solution           'SHELXS97 (Sheldrick, 1997)'
_computing_structure_refinement         'SHELXL-97 (Sheldrick, 2008)'
_computing_molecular_graphics           'ORTEP-3 for Windows (Farrugia, 1997)'
_computing_publication_material         'SHELXL-97 (Sheldrick, 1997)'
 
#----------------------------------------------------------------------------#
#                   STRUCTURE SOLUTION
#----------------------------------------------------------------------------#
 
_atom_sites_solution_primary            direct
_atom_sites_solution_secondary          difmap
_atom_sites_solution_hydrogens          geom
 
#----------------------------------------------------------------------------#
#                   REFINEMENT INFORMATION                                   #
#----------------------------------------------------------------------------#
 
_refine_special_details
;
 Refinement of F^2^ against ALL reflections.  The weighted R-factor wR and
 goodness of fit S are based on F^2^, conventional R-factors R are based
 on F, with F set to zero for negative F^2^. The threshold expression of
 F^2^ > 2\s(F^2^) is used only for calculating R-factors(gt) etc. and is
 not relevant to the choice of reflections for refinement.  R-factors based
 on F^2^ are statistically about twice as large as those based on F, and R-
 factors based on ALL data will be even larger.
;
_refine_ls_structure_factor_coef        Fsqd
_refine_ls_matrix_type                  full
_refine_ls_weighting_scheme             calc
_refine_ls_weighting_details
        'calc w=1/[\s^2^(Fo^2^)+(0.0625P)^2^+14.9186P] where P=(Fo^2^+2Fc^2^)/3'
_refine_ls_hydrogen_treatment           constr
_refine_ls_extinction_method            none
_refine_ls_number_reflns                12455
_refine_ls_number_parameters            793
_refine_ls_number_restraints            42
_refine_ls_R_factor_all                 0.104
_refine_ls_R_factor_gt                  0.0658
_refine_ls_wR_factor_ref                0.1439
_refine_ls_wR_factor_gt                 0.1329
_refine_ls_goodness_of_fit_ref          1.037
_refine_ls_restrained_S_all             1.038
_refine_ls_shift/su_max                 0.001
_refine_ls_shift/su_mean                0
_refine_diff_density_max                1.22
_refine_diff_density_min                -1.56
_refine_diff_density_rms                0.122
 
#----------------------------------------------------------------------------#
#                   ATOMIC TYPES, COORDINATES AND THERMAL PARAMETERS         #
#----------------------------------------------------------------------------#
 
loop_
    _atom_type_symbol
    _atom_type_description
    _atom_type_scat_dispersion_real
    _atom_type_scat_dispersion_imag
    _atom_type_scat_source
C C 0.0033 0.0016 'International Tables Vol C Tables 4.2.6.8 and 6.1.1.4'
H H 0 0 'International Tables Vol C Tables 4.2.6.8 and 6.1.1.4'
N N 0.0061 0.0033 'International Tables Vol C Tables 4.2.6.8 and 6.1.1.4'
P P 0.1023 0.0942 'International Tables Vol C Tables 4.2.6.8 and 6.1.1.4'
Cl Cl 0.1484 0.1585 'International Tables Vol C Tables 4.2.6.8 and 6.1.1.4'
Ru Ru -1.2594 0.8363 'International Tables Vol C Tables 4.2.6.8 and 6.1.1.4'
 
loop_
    _atom_site_label
    _atom_site_type_symbol
    _atom_site_fract_x
    _atom_site_fract_y
    _atom_site_fract_z
    _atom_site_U_iso_or_equiv
    _atom_site_adp_type
    _atom_site_occupancy
    _atom_site_symmetry_multiplicity
    _atom_site_calc_flag
    _atom_site_refinement_flags
    _atom_site_disorder_assembly
    _atom_site_disorder_group
C1 C 0.2480(2) -0.0058(5) 0.1891(2) 0.0194(14) Uani 1 1 d . . .
H1 H 0.2745 -0.0672 0.1918 0.023 Uiso 1 1 calc R . .
C2 C 0.1957(2) -0.0380(5) 0.1885(2) 0.0213(14) Uani 1 1 d . . .
H2 H 0.1872 -0.1195 0.1925 0.026 Uiso 1 1 calc R . .
C3 C 0.1560(2) 0.0494(6) 0.1823(3) 0.0250(15) Uani 1 1 d . . .
H3A H 0.1191 0.0294 0.1799 0.03 Uiso 1 1 calc R . .
C4 C 0.1715(2) 0.1675(6) 0.1795(3) 0.0250(15) Uani 1 1 d . . .
H4 H 0.1455 0.23 0.1765 0.03 Uiso 1 1 calc R . .
C5 C 0.2248(2) 0.1945(5) 0.1813(2) 0.0149(13) Uani 1 1 d . . .
C6 C 0.2441(2) 0.3182(5) 0.1793(2) 0.0185(14) Uani 1 1 d . . .
C7 C 0.3186(3) 0.4379(5) 0.1808(2) 0.0193(14) Uani 1 1 d . . .
H7 H 0.3561 0.4447 0.1824 0.023 Uiso 1 1 calc R . .
C8 C 0.2882(3) 0.5413(5) 0.1784(3) 0.0238(15) Uani 1 1 d . . .
H8 H 0.3045 0.6179 0.1792 0.029 Uiso 1 1 calc R . .
C9 C 0.2333(3) 0.5303(5) 0.1750(3) 0.0238(15) Uani 1 1 d . . .
H9 H 0.211 0.5995 0.1723 0.029 Uiso 1 1 calc R . .
C10 C 0.2113(2) 0.4181(5) 0.1754(2) 0.0208(14) Uani 1 1 d . . .
H10A H 0.1736 0.4096 0.173 0.025 Uiso 1 1 calc R . .
C11 C 0.2352(2) 0.2026(5) 0.0585(2) 0.0145(13) Uani 1 1 d U . .
C12 C 0.2195(3) 0.3204(5) 0.0430(3) 0.0242(15) Uani 1 1 d . . .
H12A H 0.2473 0.3785 0.0453 0.029 Uiso 1 1 calc R . .
C13 C 0.1641(3) 0.3541(6) 0.0244(3) 0.0406(19) Uani 1 1 d . . .
H13 H 0.1541 0.435 0.0147 0.049 Uiso 1 1 calc R . .
C14 C 0.1233(3) 0.2692(7) 0.0201(3) 0.0369(18) Uani 1 1 d U . .
H14 H 0.0852 0.2913 0.0068 0.044 Uiso 1 1 calc R . .
C15 C 0.1385(3) 0.1513(6) 0.0353(3) 0.0289(16) Uani 1 1 d . . .
H15 H 0.1108 0.0926 0.0326 0.035 Uiso 1 1 calc R . .
C16 C 0.1937(2) 0.1202(6) 0.0544(2) 0.0221(14) Uani 1 1 d . . .
H16 H 0.2037 0.0397 0.0651 0.027 Uiso 1 1 calc R . .
C17 C 0.3442(3) 0.2661(6) 0.0607(3) 0.0302(16) Uani 1 1 d . . .
H17A H 0.33 0.2552 0.0207 0.036 Uiso 1 1 calc R . .
H17B H 0.3356 0.3491 0.0684 0.036 Uiso 1 1 calc R . .
C18 C 0.4059(3) 0.2497(7) 0.0811(3) 0.0349(18) Uani 1 1 d . . .
H18A H 0.4145 0.1672 0.0727 0.042 Uiso 1 1 calc R . .
H18B H 0.4224 0.3055 0.0614 0.042 Uiso 1 1 calc R . .
C19 C 0.4833(2) 0.3269(5) 0.1605(3) 0.0249(15) Uani 1 1 d . . .
C20 C 0.4941(2) 0.3389(5) 0.2156(3) 0.0237(15) Uani 1 1 d . . .
C21 C 0.4110(2) 0.2416(5) 0.1795(2) 0.0155(13) Uani 1 1 d . . .
C22 C 0.5417(3) 0.3975(5) 0.2499(3) 0.0294(16) Uani 1 1 d . . .
H22 H 0.5495 0.4053 0.288 0.035 Uiso 1 1 calc R . .
C23 C 0.5763(3) 0.4428(6) 0.2243(3) 0.0365(19) Uani 1 1 d . . .
H23 H 0.6088 0.4846 0.2455 0.044 Uiso 1 1 calc R . .
C24 C 0.5658(3) 0.4303(6) 0.1692(3) 0.0390(19) Uani 1 1 d . . .
H24 H 0.5916 0.4629 0.154 0.047 Uiso 1 1 calc R . .
C25 C 0.5192(3) 0.3720(6) 0.1351(3) 0.0341(18) Uani 1 1 d . . .
H25 H 0.512 0.3633 0.0972 0.041 Uiso 1 1 calc R . .
C26 C 0.3130(3) 0.0190(5) 0.0610(3) 0.0232(15) Uani 1 1 d . . .
H26A H 0.2813 -0.0314 0.0612 0.028 Uiso 1 1 calc R . .
H26B H 0.3098 0.0317 0.0226 0.028 Uiso 1 1 calc R . .
C27 C 0.3668(3) -0.0481(6) 0.0900(2) 0.0266(15) Uani 1 1 d . . .
H27A H 0.3668 -0.1234 0.07 0.032 Uiso 1 1 calc R . .
H27B H 0.3984 0.001 0.0886 0.032 Uiso 1 1 calc R . .
C28 C 0.3977(2) -0.1879(5) 0.1696(3) 0.0187(14) Uani 1 1 d U . .
C29 C 0.4080(2) -0.1800(5) 0.2248(2) 0.0177(13) Uani 1 1 d . . .
C30 C 0.3725(2) -0.0006(5) 0.1862(2) 0.0161(13) Uani 1 1 d . . .
C31 C 0.4301(2) -0.2741(5) 0.2599(3) 0.0201(14) Uani 1 1 d . . .
H31 H 0.4372 -0.2685 0.2979 0.024 Uiso 1 1 calc R . .
C32 C 0.4414(2) -0.3765(5) 0.2360(3) 0.0210(14) Uani 1 1 d . . .
H32 H 0.4563 -0.4439 0.2584 0.025 Uiso 1 1 calc R . .
C33 C 0.4318(2) -0.3845(5) 0.1817(3) 0.0256(16) Uani 1 1 d . . .
H33 H 0.4409 -0.4566 0.1674 0.031 Uiso 1 1 calc R . .
C34 C 0.4090(2) -0.2900(5) 0.1462(3) 0.0264(15) Uani 1 1 d . . .
H34 H 0.4016 -0.296 0.1082 0.032 Uiso 1 1 calc R . .
C35 C 0.6842(2) 0.8457(5) 0.2483(2) 0.0182(13) Uani 1 1 d . . .
C36 C 0.6781(2) 0.9695(5) 0.2275(3) 0.0183(14) Uani 1 1 d . . .
C37 C 0.6718(2) 0.9981(6) 0.1748(3) 0.0249(15) Uani 1 1 d . . .
H37 H 0.6713 0.9368 0.1494 0.03 Uiso 1 1 calc R . .
C38 C 0.6662(3) 1.1165(6) 0.1587(3) 0.0303(16) Uani 1 1 d . . .
H38 H 0.6612 1.1373 0.1221 0.036 Uiso 1 1 calc R . .
C39 C 0.6678(2) 1.2035(6) 0.1960(3) 0.0246(15) Uani 1 1 d . . .
H39 H 0.6655 1.2858 0.1863 0.03 Uiso 1 1 calc R . .
C40 C 0.6729(2) 1.1691(6) 0.2479(3) 0.0240(15) Uani 1 1 d . . .
H40 H 0.6729 1.2296 0.2734 0.029 Uiso 1 1 calc R . .
C41 C 0.6884(2) 0.7470(5) 0.2172(3) 0.0193(14) Uani 1 1 d . . .
H41 H 0.6875 0.7573 0.1808 0.023 Uiso 1 1 calc R . .
C42 C 0.6940(2) 0.6343(5) 0.2401(3) 0.0215(15) Uani 1 1 d . . .
H42 H 0.6966 0.566 0.2195 0.026 Uiso 1 1 calc R . .
C43 C 0.6957(2) 0.6216(5) 0.2931(3) 0.0213(14) Uani 1 1 d . . .
H43 H 0.6997 0.5448 0.3095 0.026 Uiso 1 1 calc R . .
C44 C 0.6914(2) 0.7226(5) 0.3218(2) 0.0158(13) Uani 1 1 d . . .
H44 H 0.6926 0.7138 0.3584 0.019 Uiso 1 1 calc R . .
C45 C 0.5625(3) 0.8538(5) 0.3422(3) 0.0276(16) Uani 1 1 d . . .
H45A H 0.5214 0.8507 0.3271 0.033 Uiso 1 1 calc R . .
H45B H 0.5768 0.7775 0.3328 0.033 Uiso 1 1 calc R . .
C46 C 0.5805(2) 0.8641(6) 0.4031(3) 0.0264(15) Uani 1 1 d . . .
H46A H 0.5642 0.9379 0.4123 0.032 Uiso 1 1 calc R . .
H46B H 0.5653 0.7953 0.4172 0.032 Uiso 1 1 calc R . .
C47 C 0.6804(2) 0.9156(4) 0.4124(2) 0.0144(13) Uani 1 1 d U . .
C48 C 0.7212(2) 0.8445(5) 0.4983(2) 0.0186(14) Uani 1 1 d . . .
C49 C 0.7574(3) 0.8075(6) 0.5484(3) 0.0308(16) Uani 1 1 d . . .
H49 H 0.7962 0.8223 0.5594 0.037 Uiso 1 1 calc R . .
C50 C 0.7343(3) 0.7480(5) 0.5816(3) 0.0284(16) Uani 1 1 d U . .
H50 H 0.7582 0.7194 0.6158 0.034 Uiso 1 1 calc R . .
C51 C 0.6776(3) 0.7281(5) 0.5672(3) 0.0297(16) Uani 1 1 d . . .
H51 H 0.6634 0.6879 0.5917 0.036 Uiso 1 1 calc R . .
C52 C 0.6416(3) 0.7670(5) 0.5170(3) 0.0232(15) Uani 1 1 d . . .
H52 H 0.6026 0.7551 0.5064 0.028 Uiso 1 1 calc R . .
C53 C 0.6650(2) 0.8234(5) 0.4834(2) 0.0177(13) Uani 1 1 d . . .
C54 C 0.5491(2) 1.1064(5) 0.3211(3) 0.0242(15) Uani 1 1 d . . .
H54A H 0.5434 1.1625 0.2903 0.029 Uiso 1 1 calc R . .
H54B H 0.512 1.0809 0.3208 0.029 Uiso 1 1 calc R . .
C55 C 0.5787(3) 1.1729(5) 0.3743(3) 0.0248(15) Uani 1 1 d . . .
H55A H 0.5549 1.2399 0.3778 0.03 Uiso 1 1 calc R . .
H55B H 0.5836 1.1176 0.4051 0.03 Uiso 1 1 calc R . .
C56 C 0.6750(2) 1.1547(5) 0.3719(2) 0.0198(14) Uani 1 1 d . . .
C57 C 0.7056(3) 1.3431(5) 0.4024(3) 0.0245(15) Uani 1 1 d . . .
C58 C 0.6496(3) 1.3348(5) 0.3964(2) 0.0230(14) Uani 1 1 d U . .
C59 C 0.6207(3) 1.4310(6) 0.4068(3) 0.0314(17) Uani 1 1 d . . .
H59 H 0.5823 1.4266 0.4019 0.038 Uiso 1 1 calc R . .
C60 C 0.6521(3) 1.5358(6) 0.4251(3) 0.039(2) Uani 1 1 d . . .
H60 H 0.6341 1.6045 0.4327 0.047 Uiso 1 1 calc R . .
C61 C 0.7074(3) 1.5421(5) 0.4323(3) 0.0319(17) Uani 1 1 d . . .
H61 H 0.7268 1.6144 0.4457 0.038 Uiso 1 1 calc R . .
C62 C 0.7364(3) 1.4470(5) 0.4207(3) 0.0287(16) Uani 1 1 d . . .
H62 H 0.7747 1.4524 0.4249 0.034 Uiso 1 1 calc R . .
C63 C 0.5557(2) 0.9452(5) 0.2375(2) 0.0171(13) Uani 1 1 d . . .
C64 C 0.5516(2) 0.8280(5) 0.2185(3) 0.0223(14) Uani 1 1 d . . .
H64 H 0.5597 0.7634 0.2437 0.027 Uiso 1 1 calc R . .
C65 C 0.5360(2) 0.8046(6) 0.1634(3) 0.0281(16) Uani 1 1 d . . .
H65 H 0.5343 0.7245 0.1507 0.034 Uiso 1 1 calc R . .
C66 C 0.5228(3) 0.8986(6) 0.1266(3) 0.0296(16) Uani 1 1 d U . .
H66 H 0.5117 0.8827 0.0887 0.036 Uiso 1 1 calc R . .
C67 C 0.5256(2) 1.0148(6) 0.1448(3) 0.0297(16) Uani 1 1 d . . .
H67 H 0.5161 1.0791 0.1195 0.036 Uiso 1 1 calc R . .
C68 C 0.5425(2) 1.0376(6) 0.2002(3) 0.0217(14) Uani 1 1 d . . .
H68 H 0.545 1.1179 0.2127 0.026 Uiso 1 1 calc R . .
N1 N 0.29727(18) 0.3289(4) 0.18085(19) 0.0157(11) Uani 1 1 d . . .
N2 N 0.26301(19) 0.1080(4) 0.18583(19) 0.0141(11) Uani 1 1 d . . .
N3 N 0.44937(18) 0.2863(4) 0.2257(2) 0.0179(11) Uani 1 1 d . . .
H3 H 0.4462 0.2824 0.2582 0.021 Uiso 1 1 calc R . .
N4 N 0.43170(19) 0.2704(4) 0.1395(2) 0.0196(12) Uani 1 1 d . . .
N5 N 0.39220(18) -0.0628(4) 0.2333(2) 0.0147(11) Uani 1 1 d . . .
H5 H 0.3949 -0.0337 0.2654 0.018 Uiso 1 1 calc R . .
N6 N 0.37541(19) -0.0771(4) 0.14683(19) 0.0156(11) Uani 1 1 d . . .
N7 N 0.68554(19) 0.8330(4) 0.2999(2) 0.0176(11) Uani 1 1 d . . .
N8 N 0.67781(19) 1.0539(4) 0.2645(2) 0.0176(11) Uani 1 1 d . . .
N9 N 0.64085(18) 0.8675(4) 0.43072(19) 0.0146(11) Uani 1 1 d . . .
N10 N 0.7286(2) 0.9014(4) 0.45445(19) 0.0176(11) Uani 1 1 d . . .
H10 H 0.7611 0.9257 0.4539 0.021 Uiso 1 1 calc R . .
N11 N 0.6328(2) 1.2201(4) 0.3777(2) 0.0200(12) Uani 1 1 d . . .
N12 N 0.7197(2) 1.2314(4) 0.3874(2) 0.0212(12) Uani 1 1 d . . .
H12 H 0.7531 1.2121 0.3878 0.025 Uiso 1 1 calc R . .
P1 P 0.30816(6) 0.16219(13) 0.09114(6) 0.0152(3) Uani 1 1 d . . .
P2 P 0.58629(6) 0.97599(12) 0.31027(6) 0.0146(3) Uani 1 1 d . . .
Cl1 Cl 0.37373(6) 0.17785(13) 0.28401(6) 0.0210(3) Uani 1 1 d . . .
Cl2 Cl 0.78252(6) 0.99484(14) 0.37334(7) 0.0259(4) Uani 1 1 d . . .
Cl3 Cl 0.39684(9) -0.0048(2) -0.02405(9) 0.0637(7) Uani 1 1 d . . .
Cl4 Cl 0.48720(7) 0.62442(18) 0.41147(8) 0.0438(5) Uani 1 1 d . . .
Ru1 Ru 0.340247(19) 0.16622(4) 0.18101(2) 0.01288(13) Uani 1 1 d . . .
Ru2 Ru 0.677828(19) 0.99159(4) 0.34141(2) 0.01441(13) Uani 1 1 d . . .
 
loop_
    _atom_site_aniso_label
    _atom_site_aniso_U_11
    _atom_site_aniso_U_22
    _atom_site_aniso_U_33
    _atom_site_aniso_U_23
    _atom_site_aniso_U_13
    _atom_site_aniso_U_12
C1 0.021(3) 0.021(3) 0.017(4) 0.000(3) 0.008(3) 0.001(3)
C2 0.018(3) 0.027(3) 0.019(4) -0.001(3) 0.007(3) -0.006(3)
C3 0.013(3) 0.040(4) 0.024(4) -0.005(3) 0.008(3) -0.007(3)
C4 0.014(3) 0.032(4) 0.030(4) 0.001(3) 0.008(3) -0.002(3)
C5 0.022(3) 0.019(3) 0.005(3) -0.001(2) 0.007(3) 0.002(3)
C6 0.015(3) 0.027(3) 0.011(4) 0.001(3) 0.001(3) 0.005(3)
C7 0.023(3) 0.015(3) 0.019(4) 0.003(3) 0.005(3) 0.003(3)
C8 0.029(4) 0.020(3) 0.023(4) 0.004(3) 0.009(3) 0.003(3)
C9 0.025(4) 0.018(3) 0.028(4) 0.009(3) 0.009(3) 0.015(3)
C10 0.014(3) 0.032(4) 0.018(4) 0.000(3) 0.007(3) 0.004(3)
C11 0.020(3) 0.019(3) 0.008(3) -0.003(2) 0.009(2) -0.001(2)
C12 0.026(4) 0.022(3) 0.021(4) 0.003(3) 0.004(3) -0.004(3)
C13 0.036(4) 0.034(4) 0.043(5) 0.010(3) 0.002(4) 0.016(3)
C14 0.024(3) 0.057(4) 0.028(4) 0.003(3) 0.006(3) 0.016(3)
C15 0.021(4) 0.044(4) 0.019(4) -0.007(3) 0.003(3) -0.006(3)
C16 0.017(3) 0.030(4) 0.016(4) -0.002(3) 0.001(3) 0.005(3)
C17 0.025(4) 0.047(4) 0.020(4) 0.004(3) 0.009(3) -0.004(3)
C18 0.029(4) 0.060(5) 0.023(5) -0.002(3) 0.019(3) -0.013(4)
C19 0.012(3) 0.017(3) 0.045(5) 0.005(3) 0.009(3) 0.000(3)
C20 0.015(3) 0.013(3) 0.038(5) 0.006(3) 0.002(3) 0.004(3)
C21 0.021(3) 0.008(3) 0.016(4) -0.001(2) 0.004(3) 0.006(2)
C22 0.020(4) 0.022(3) 0.039(5) 0.005(3) 0.001(3) -0.002(3)
C23 0.019(4) 0.024(4) 0.062(6) -0.009(4) 0.008(4) -0.014(3)
C24 0.024(4) 0.035(4) 0.060(6) 0.009(4) 0.016(4) -0.003(3)
C25 0.025(4) 0.032(4) 0.047(5) 0.006(3) 0.014(4) 0.000(3)
C26 0.029(4) 0.021(3) 0.013(4) -0.007(3) -0.001(3) 0.009(3)
C27 0.028(4) 0.043(4) 0.010(4) 0.005(3) 0.008(3) 0.017(3)
C28 0.016(3) 0.008(3) 0.031(4) 0.003(2) 0.006(3) 0.004(2)
C29 0.012(3) 0.018(3) 0.023(4) 0.006(3) 0.005(3) -0.001(2)
C30 0.011(3) 0.020(3) 0.017(4) -0.003(3) 0.005(3) -0.002(3)
C31 0.013(3) 0.021(3) 0.028(4) 0.010(3) 0.008(3) -0.005(3)
C32 0.021(3) 0.010(3) 0.031(5) 0.000(3) 0.007(3) -0.003(3)
C33 0.013(3) 0.016(3) 0.046(5) -0.001(3) 0.008(3) 0.006(3)
C34 0.019(3) 0.027(4) 0.028(4) -0.009(3) 0.002(3) 0.003(3)
C35 0.010(3) 0.030(4) 0.014(4) 0.003(3) 0.004(3) 0.000(3)
C36 0.013(3) 0.018(3) 0.023(4) 0.001(3) 0.006(3) -0.001(2)
C37 0.024(3) 0.031(4) 0.018(4) 0.000(3) 0.005(3) 0.005(3)
C38 0.026(4) 0.050(5) 0.012(4) 0.012(3) 0.002(3) -0.006(3)
C39 0.019(3) 0.033(4) 0.020(4) 0.011(3) 0.003(3) 0.001(3)
C40 0.017(3) 0.031(4) 0.022(4) 0.004(3) 0.005(3) 0.001(3)
C41 0.012(3) 0.030(4) 0.018(4) -0.005(3) 0.007(3) -0.004(3)
C42 0.020(3) 0.022(3) 0.022(4) -0.011(3) 0.008(3) -0.003(3)
C43 0.016(3) 0.024(3) 0.023(4) -0.003(3) 0.005(3) 0.002(3)
C44 0.017(3) 0.023(3) 0.012(4) 0.002(3) 0.011(3) 0.001(3)
C45 0.025(4) 0.024(4) 0.034(5) 0.008(3) 0.010(3) -0.007(3)
C46 0.019(3) 0.034(4) 0.025(4) 0.008(3) 0.006(3) 0.003(3)
C47 0.017(3) 0.008(3) 0.014(3) -0.007(2) 0.000(2) 0.001(2)
C48 0.028(4) 0.011(3) 0.017(4) -0.003(2) 0.008(3) -0.002(3)
C49 0.036(4) 0.030(4) 0.017(4) 0.000(3) -0.002(3) -0.003(3)
C50 0.047(4) 0.021(3) 0.013(3) 0.002(2) 0.005(3) 0.001(3)
C51 0.051(5) 0.021(3) 0.023(4) -0.002(3) 0.020(4) -0.007(3)
C52 0.030(4) 0.022(3) 0.018(4) 0.002(3) 0.009(3) -0.005(3)
C53 0.028(4) 0.016(3) 0.010(4) 0.003(2) 0.006(3) 0.002(3)
C54 0.020(3) 0.030(4) 0.021(4) -0.004(3) 0.005(3) 0.003(3)
C55 0.026(4) 0.027(3) 0.024(4) 0.000(3) 0.012(3) 0.002(3)
C56 0.025(3) 0.022(3) 0.012(4) 0.005(3) 0.006(3) 0.006(3)
C57 0.042(4) 0.016(3) 0.014(4) 0.006(3) 0.007(3) 0.004(3)
C58 0.036(3) 0.020(3) 0.009(3) -0.005(2) 0.003(3) 0.001(3)
C59 0.047(4) 0.030(4) 0.013(4) -0.001(3) 0.005(3) 0.010(3)
C60 0.071(6) 0.012(3) 0.026(5) 0.000(3) 0.005(4) 0.007(4)
C61 0.054(5) 0.010(3) 0.020(4) 0.001(3) -0.002(4) -0.004(3)
C62 0.047(4) 0.021(4) 0.015(4) 0.001(3) 0.007(3) -0.011(3)
C63 0.006(3) 0.024(3) 0.022(4) -0.001(3) 0.006(3) 0.001(2)
C64 0.024(3) 0.022(3) 0.021(4) 0.004(3) 0.008(3) -0.001(3)
C65 0.020(4) 0.037(4) 0.029(5) -0.011(3) 0.010(3) -0.007(3)
C66 0.019(3) 0.053(4) 0.016(4) -0.006(3) 0.005(3) -0.002(3)
C67 0.017(3) 0.049(4) 0.021(4) 0.005(3) 0.003(3) 0.012(3)
C68 0.015(3) 0.030(4) 0.020(4) 0.003(3) 0.005(3) 0.006(3)
N1 0.012(3) 0.022(3) 0.009(3) 0.002(2) -0.002(2) 0.002(2)
N2 0.015(3) 0.017(3) 0.011(3) -0.002(2) 0.005(2) -0.004(2)
N3 0.011(3) 0.017(3) 0.021(3) 0.004(2) 0.000(2) 0.004(2)
N4 0.018(3) 0.019(3) 0.022(3) -0.002(2) 0.007(2) 0.001(2)
N5 0.011(2) 0.019(3) 0.017(3) -0.002(2) 0.008(2) -0.001(2)
N6 0.014(3) 0.019(3) 0.014(3) 0.001(2) 0.004(2) 0.007(2)
N7 0.019(3) 0.017(3) 0.017(3) -0.002(2) 0.006(2) 0.003(2)
N8 0.018(3) 0.016(3) 0.020(3) 0.003(2) 0.007(2) -0.004(2)
N9 0.013(3) 0.018(3) 0.013(3) 0.007(2) 0.004(2) 0.004(2)
N10 0.017(3) 0.023(3) 0.010(3) 0.004(2) 0.000(2) 0.000(2)
N11 0.023(3) 0.019(3) 0.018(3) -0.004(2) 0.008(2) -0.001(2)
N12 0.024(3) 0.024(3) 0.016(3) 0.002(2) 0.007(2) -0.006(2)
P1 0.0148(8) 0.0159(8) 0.0144(9) 0.0000(6) 0.0045(7) 0.0016(6)
P2 0.0154(8) 0.0148(8) 0.0128(9) 0.0014(6) 0.0039(7) 0.0012(6)
Cl1 0.0219(8) 0.0250(8) 0.0157(9) -0.0011(6) 0.0058(7) 0.0020(6)
Cl2 0.0206(8) 0.0328(9) 0.0250(10) -0.0003(7) 0.0089(7) -0.0056(7)
Cl3 0.0479(12) 0.1163(19) 0.0333(13) 0.0232(12) 0.0220(11) 0.0243(13)
Cl4 0.0248(9) 0.0764(14) 0.0286(12) 0.0059(9) 0.0068(8) -0.0174(9)
Ru1 0.0123(2) 0.0135(2) 0.0132(3) -0.00117(19) 0.0048(2) 0.0012(2)
Ru2 0.0146(2) 0.0142(2) 0.0142(3) 0.00072(19) 0.0047(2) -0.0009(2)
 
 
#----------------------------------------------------------------------------#
#                   MOLECULAR GEOMETRY                                       #
#----------------------------------------------------------------------------#
 
_geom_special_details
;
 All s.u.'s (except the s.u. in the dihedral angle between two l.s. planes)
 are estimated using the full covariance matrix.  The cell s.u.'s are taken
 into account individually in the estimation of s.u.'s in distances, angles
 and torsion angles; correlations between s.u.'s in cell parameters are only
 used when they are defined by crystal symmetry.  An approximate (isotropic)
 treatment of cell s.u.'s is used for estimating s.u.'s involving l.s. planes.
;
loop_
    _geom_bond_atom_site_label_1
    _geom_bond_atom_site_label_2
    _geom_bond_distance
    _geom_bond_site_symmetry_2
    _geom_bond_publ_flag
C1 N2 1.338(7) . ?
C1 C2 1.384(8) . ?
C1 H1 0.95 . ?
C2 C3 1.378(8) . ?
C2 H2 0.95 . ?
C3 C4 1.387(8) . ?
C3 H3A 0.95 . ?
C4 C5 1.385(8) . ?
C4 H4 0.95 . ?
C5 N2 1.351(7) . ?
C5 C6 1.475(8) . ?
C6 N1 1.355(7) . ?
C6 C10 1.379(8) . ?
C7 N1 1.335(7) . ?
C7 C8 1.383(8) . ?
C7 H7 0.95 . ?
C8 C9 1.382(8) . ?
C8 H8 0.95 . ?
C9 C10 1.375(8) . ?
C9 H9 0.95 . ?
C10 H10A 0.95 . ?
C11 C16 1.383(8) . ?
C11 C12 1.394(8) . ?
C11 P1 1.825(6) . ?
C12 C13 1.387(9) . ?
C12 H12A 0.95 . ?
C13 C14 1.387(10) . ?
C13 H13 0.95 . ?
C14 C15 1.392(9) . ?
C14 H14 0.95 . ?
C15 C16 1.374(8) . ?
C15 H15 0.95 . ?
C16 H16 0.95 . ?
C17 C18 1.495(9) . ?
C17 P1 1.828(6) . ?
C17 H17A 0.99 . ?
C17 H17B 0.99 . ?
C18 N4 1.460(8) . ?
C18 H18A 0.99 . ?
C18 H18B 0.99 . ?
C19 C20 1.378(9) . ?
C19 N4 1.397(7) . ?
C19 C25 1.399(9) . ?
C20 N3 1.391(7) . ?
C20 C22 1.405(9) . ?
C21 N4 1.365(7) . ?
C21 N3 1.365(7) . ?
C21 Ru1 2.010(6) . ?
C22 C23 1.377(9) . ?
C22 H22 0.95 . ?
C23 C24 1.381(10) . ?
C23 H23 0.95 . ?
C24 C25 1.384(10) . ?
C24 H24 0.95 . ?
C25 H25 0.95 . ?
C26 C27 1.522(8) . ?
C26 P1 1.806(6) . ?
C26 H26A 0.99 . ?
C26 H26B 0.99 . ?
C27 N6 1.462(7) . ?
C27 H27A 0.99 . ?
C27 H27B 0.99 . ?
C28 C34 1.371(8) . ?
C28 C29 1.377(9) . ?
C28 N6 1.407(7) . ?
C29 C31 1.382(8) . ?
C29 N5 1.410(7) . ?
C30 N5 1.353(7) . ?
C30 N6 1.359(7) . ?
C30 Ru1 2.024(6) . ?
C31 C32 1.380(8) . ?
C31 H31 0.95 . ?
C32 C33 1.360(9) . ?
C32 H32 0.95 . ?
C33 C34 1.394(9) . ?
C33 H33 0.95 . ?
C34 H34 0.95 . ?
C35 N7 1.346(7) . ?
C35 C41 1.397(8) . ?
C35 C36 1.475(8) . ?
C36 N8 1.354(7) . ?
C36 C37 1.368(9) . ?
C37 C38 1.381(9) . ?
C37 H37 0.95 . ?
C38 C39 1.368(9) . ?
C38 H38 0.95 . ?
C39 C40 1.372(9) . ?
C39 H39 0.95 . ?
C40 N8 1.350(7) . ?
C40 H40 0.95 . ?
C41 C42 1.381(8) . ?
C41 H41 0.95 . ?
C42 C43 1.378(9) . ?
C42 H42 0.95 . ?
C43 C44 1.379(8) . ?
C43 H43 0.95 . ?
C44 N7 1.347(7) . ?
C44 H44 0.95 . ?
C45 C46 1.503(9) . ?
C45 P2 1.811(6) . ?
C45 H45A 0.99 . ?
C45 H45B 0.99 . ?
C46 N9 1.465(7) . ?
C46 H46A 0.99 . ?
C46 H46B 0.99 . ?
C47 N10 1.352(7) . ?
C47 N9 1.371(7) . ?
C47 Ru2 2.022(6) . ?
C48 C53 1.378(8) . ?
C48 N10 1.378(7) . ?
C48 C49 1.384(9) . ?
C49 C50 1.377(9) . ?
C49 H49 0.95 . ?
C50 C51 1.388(9) . ?
C50 H50 0.95 . ?
C51 C52 1.391(9) . ?
C51 H51 0.95 . ?
C52 C53 1.376(8) . ?
C52 H52 0.95 . ?
C53 N9 1.392(7) . ?
C54 C55 1.529(8) . ?
C54 P2 1.815(6) . ?
C54 H54A 0.99 . ?
C54 H54B 0.99 . ?
C55 N11 1.457(7) . ?
C55 H55A 0.99 . ?
C55 H55B 0.99 . ?
C56 N11 1.355(7) . ?
C56 N12 1.375(7) . ?
C56 Ru2 2.000(6) . ?
C57 C58 1.391(9) . ?
C57 N12 1.392(7) . ?
C57 C62 1.392(9) . ?
C58 C59 1.383(8) . ?
C58 N11 1.386(7) . ?
C59 C60 1.407(9) . ?
C59 H59 0.95 . ?
C60 C61 1.367(10) . ?
C60 H60 0.95 . ?
C61 C62 1.388(9) . ?
C61 H61 0.95 . ?
C62 H62 0.95 . ?
C63 C68 1.380(8) . ?
C63 C64 1.391(8) . ?
C63 P2 1.825(6) . ?
C64 C65 1.383(9) . ?
C64 H64 0.95 . ?
C65 C66 1.384(9) . ?
C65 H65 0.95 . ?
C66 C67 1.376(9) . ?
C66 H66 0.95 . ?
C67 C68 1.386(9) . ?
C67 H67 0.95 . ?
C68 H68 0.95 . ?
N1 Ru1 2.124(4) . ?
N2 Ru1 2.127(4) . ?
N3 H3 0.88 . ?
N5 H5 0.88 . ?
N7 Ru2 2.122(5) . ?
N8 Ru2 2.129(5) . ?
N10 H10 0.88 . ?
N12 H12 0.88 . ?
P1 Ru1 2.2083(16) . ?
P2 Ru2 2.2099(15) . ?
Cl1 Ru1 2.5345(16) . ?
Cl2 Ru2 2.5212(15) . ?
 
loop_
    _geom_angle_atom_site_label_1
    _geom_angle_atom_site_label_2
    _geom_angle_atom_site_label_3
    _geom_angle
    _geom_angle_site_symmetry_1
    _geom_angle_site_symmetry_3
    _geom_angle_publ_flag
N2 C1 C2 123.0(5) . . ?
N2 C1 H1 118.5 . . ?
C2 C1 H1 118.5 . . ?
C3 C2 C1 119.4(6) . . ?
C3 C2 H2 120.3 . . ?
C1 C2 H2 120.3 . . ?
C2 C3 C4 117.8(5) . . ?
C2 C3 H3A 121.1 . . ?
C4 C3 H3A 121.1 . . ?
C5 C4 C3 120.2(6) . . ?
C5 C4 H4 119.9 . . ?
C3 C4 H4 119.9 . . ?
N2 C5 C4 121.6(5) . . ?
N2 C5 C6 115.7(5) . . ?
C4 C5 C6 122.7(5) . . ?
N1 C6 C10 120.8(5) . . ?
N1 C6 C5 115.2(5) . . ?
C10 C6 C5 124.0(5) . . ?
N1 C7 C8 122.5(5) . . ?
N1 C7 H7 118.8 . . ?
C8 C7 H7 118.8 . . ?
C9 C8 C7 118.2(6) . . ?
C9 C8 H8 120.9 . . ?
C7 C8 H8 120.9 . . ?
C10 C9 C8 119.5(5) . . ?
C10 C9 H9 120.3 . . ?
C8 C9 H9 120.3 . . ?
C9 C10 C6 119.7(5) . . ?
C9 C10 H10A 120.1 . . ?
C6 C10 H10A 120.1 . . ?
C16 C11 C12 117.9(5) . . ?
C16 C11 P1 120.6(4) . . ?
C12 C11 P1 121.1(4) . . ?
C13 C12 C11 121.1(6) . . ?
C13 C12 H12A 119.4 . . ?
C11 C12 H12A 119.4 . . ?
C12 C13 C14 119.7(6) . . ?
C12 C13 H13 120.1 . . ?
C14 C13 H13 120.1 . . ?
C13 C14 C15 119.6(6) . . ?
C13 C14 H14 120.2 . . ?
C15 C14 H14 120.2 . . ?
C16 C15 C14 119.7(6) . . ?
C16 C15 H15 120.2 . . ?
C14 C15 H15 120.2 . . ?
C15 C16 C11 121.9(6) . . ?
C15 C16 H16 119 . . ?
C11 C16 H16 119 . . ?
C18 C17 P1 113.4(5) . . ?
C18 C17 H17A 108.9 . . ?
P1 C17 H17A 108.9 . . ?
C18 C17 H17B 108.9 . . ?
P1 C17 H17B 108.9 . . ?
H17A C17 H17B 107.7 . . ?
N4 C18 C17 113.5(5) . . ?
N4 C18 H18A 108.9 . . ?
C17 C18 H18A 108.9 . . ?
N4 C18 H18B 108.9 . . ?
C17 C18 H18B 108.9 . . ?
H18A C18 H18B 107.7 . . ?
C20 C19 N4 106.1(5) . . ?
C20 C19 C25 122.2(6) . . ?
N4 C19 C25 131.6(7) . . ?
C19 C20 N3 106.0(5) . . ?
C19 C20 C22 122.2(6) . . ?
N3 C20 C22 131.8(6) . . ?
N4 C21 N3 103.9(5) . . ?
N4 C21 Ru1 134.7(4) . . ?
N3 C21 Ru1 121.1(4) . . ?
C23 C22 C20 115.0(7) . . ?
C23 C22 H22 122.5 . . ?
C20 C22 H22 122.5 . . ?
C22 C23 C24 123.0(6) . . ?
C22 C23 H23 118.5 . . ?
C24 C23 H23 118.5 . . ?
C23 C24 C25 122.3(7) . . ?
C23 C24 H24 118.8 . . ?
C25 C24 H24 118.8 . . ?
C24 C25 C19 115.3(7) . . ?
C24 C25 H25 122.3 . . ?
C19 C25 H25 122.3 . . ?
C27 C26 P1 113.9(4) . . ?
C27 C26 H26A 108.8 . . ?
P1 C26 H26A 108.8 . . ?
C27 C26 H26B 108.8 . . ?
P1 C26 H26B 108.8 . . ?
H26A C26 H26B 107.7 . . ?
N6 C27 C26 114.3(5) . . ?
N6 C27 H27A 108.7 . . ?
C26 C27 H27A 108.7 . . ?
N6 C27 H27B 108.7 . . ?
C26 C27 H27B 108.7 . . ?
H27A C27 H27B 107.6 . . ?
C34 C28 C29 121.8(5) . . ?
C34 C28 N6 131.2(6) . . ?
C29 C28 N6 107.0(5) . . ?
C28 C29 C31 122.3(5) . . ?
C28 C29 N5 105.2(5) . . ?
C31 C29 N5 132.5(6) . . ?
N5 C30 N6 105.4(5) . . ?
N5 C30 Ru1 123.4(4) . . ?
N6 C30 Ru1 130.9(4) . . ?
C32 C31 C29 115.6(6) . . ?
C32 C31 H31 122.2 . . ?
C29 C31 H31 122.2 . . ?
C33 C32 C31 122.4(6) . . ?
C33 C32 H32 118.8 . . ?
C31 C32 H32 118.8 . . ?
C32 C33 C34 122.0(6) . . ?
C32 C33 H33 119 . . ?
C34 C33 H33 119 . . ?
C28 C34 C33 115.9(6) . . ?
C28 C34 H34 122 . . ?
C33 C34 H34 122 . . ?
N7 C35 C41 121.4(5) . . ?
N7 C35 C36 115.7(5) . . ?
C41 C35 C36 122.9(5) . . ?
N8 C36 C37 122.0(5) . . ?
N8 C36 C35 114.5(5) . . ?
C37 C36 C35 123.5(5) . . ?
C36 C37 C38 119.6(6) . . ?
C36 C37 H37 120.2 . . ?
C38 C37 H37 120.2 . . ?
C39 C38 C37 119.3(6) . . ?
C39 C38 H38 120.4 . . ?
C37 C38 H38 120.4 . . ?
C38 C39 C40 118.4(6) . . ?
C38 C39 H39 120.8 . . ?
C40 C39 H39 120.8 . . ?
N8 C40 C39 123.5(6) . . ?
N8 C40 H40 118.3 . . ?
C39 C40 H40 118.3 . . ?
C42 C41 C35 118.9(6) . . ?
C42 C41 H41 120.6 . . ?
C35 C41 H41 120.6 . . ?
C43 C42 C41 119.6(5) . . ?
C43 C42 H42 120.2 . . ?
C41 C42 H42 120.2 . . ?
C42 C43 C44 118.8(6) . . ?
C42 C43 H43 120.6 . . ?
C44 C43 H43 120.6 . . ?
N7 C44 C43 122.4(5) . . ?
N7 C44 H44 118.8 . . ?
C43 C44 H44 118.8 . . ?
C46 C45 P2 113.6(4) . . ?
C46 C45 H45A 108.8 . . ?
P2 C45 H45A 108.8 . . ?
C46 C45 H45B 108.8 . . ?
P2 C45 H45B 108.8 . . ?
H45A C45 H45B 107.7 . . ?
N9 C46 C45 114.5(5) . . ?
N9 C46 H46A 108.6 . . ?
C45 C46 H46A 108.6 . . ?
N9 C46 H46B 108.6 . . ?
C45 C46 H46B 108.6 . . ?
H46A C46 H46B 107.6 . . ?
N10 C47 N9 104.4(5) . . ?
N10 C47 Ru2 122.0(4) . . ?
N9 C47 Ru2 133.6(4) . . ?
C53 C48 N10 105.8(5) . . ?
C53 C48 C49 120.8(6) . . ?
N10 C48 C49 133.4(6) . . ?
C50 C49 C48 116.6(6) . . ?
C50 C49 H49 121.7 . . ?
C48 C49 H49 121.7 . . ?
C49 C50 C51 123.0(6) . . ?
C49 C50 H50 118.5 . . ?
C51 C50 H50 118.5 . . ?
C50 C51 C52 119.9(6) . . ?
C50 C51 H51 120 . . ?
C52 C51 H51 120 . . ?
C53 C52 C51 116.9(6) . . ?
C53 C52 H52 121.5 . . ?
C51 C52 H52 121.5 . . ?
C52 C53 C48 122.8(6) . . ?
C52 C53 N9 130.6(6) . . ?
C48 C53 N9 106.6(5) . . ?
C55 C54 P2 114.1(4) . . ?
C55 C54 H54A 108.7 . . ?
P2 C54 H54A 108.7 . . ?
C55 C54 H54B 108.7 . . ?
P2 C54 H54B 108.7 . . ?
H54A C54 H54B 107.6 . . ?
N11 C55 C54 113.4(5) . . ?
N11 C55 H55A 108.9 . . ?
C54 C55 H55A 108.9 . . ?
N11 C55 H55B 108.9 . . ?
C54 C55 H55B 108.9 . . ?
H55A C55 H55B 107.7 . . ?
N11 C56 N12 104.3(5) . . ?
N11 C56 Ru2 132.4(4) . . ?
N12 C56 Ru2 123.0(4) . . ?
C58 C57 N12 105.4(5) . . ?
C58 C57 C62 122.3(6) . . ?
N12 C57 C62 132.3(6) . . ?
C59 C58 N11 131.7(6) . . ?
C59 C58 C57 121.8(6) . . ?
N11 C58 C57 106.5(5) . . ?
C58 C59 C60 115.6(7) . . ?
C58 C59 H59 122.2 . . ?
C60 C59 H59 122.2 . . ?
C61 C60 C59 122.3(6) . . ?
C61 C60 H60 118.9 . . ?
C59 C60 H60 118.9 . . ?
C60 C61 C62 122.5(6) . . ?
C60 C61 H61 118.7 . . ?
C62 C61 H61 118.7 . . ?
C61 C62 C57 115.5(6) . . ?
C61 C62 H62 122.3 . . ?
C57 C62 H62 122.3 . . ?
C68 C63 C64 118.7(6) . . ?
C68 C63 P2 120.6(5) . . ?
C64 C63 P2 120.2(4) . . ?
C65 C64 C63 120.6(6) . . ?
C65 C64 H64 119.7 . . ?
C63 C64 H64 119.7 . . ?
C64 C65 C66 119.7(6) . . ?
C64 C65 H65 120.2 . . ?
C66 C65 H65 120.2 . . ?
C67 C66 C65 120.3(6) . . ?
C67 C66 H66 119.9 . . ?
C65 C66 H66 119.9 . . ?
C66 C67 C68 119.6(6) . . ?
C66 C67 H67 120.2 . . ?
C68 C67 H67 120.2 . . ?
C63 C68 C67 121.0(6) . . ?
C63 C68 H68 119.5 . . ?
C67 C68 H68 119.5 . . ?
C7 N1 C6 119.2(5) . . ?
C7 N1 Ru1 124.6(4) . . ?
C6 N1 Ru1 116.1(4) . . ?
C1 N2 C5 118.0(5) . . ?
C1 N2 Ru1 125.9(4) . . ?
C5 N2 Ru1 115.9(3) . . ?
C21 N3 C20 112.1(5) . . ?
C21 N3 H3 123.9 . . ?
C20 N3 H3 123.9 . . ?
C21 N4 C19 111.7(5) . . ?
C21 N4 C18 127.5(5) . . ?
C19 N4 C18 120.7(5) . . ?
C30 N5 C29 111.8(5) . . ?
C30 N5 H5 124.1 . . ?
C29 N5 H5 124.1 . . ?
C30 N6 C28 110.6(5) . . ?
C30 N6 C27 127.0(5) . . ?
C28 N6 C27 121.6(5) . . ?
C35 N7 C44 118.9(5) . . ?
C35 N7 Ru2 116.7(4) . . ?
C44 N7 Ru2 124.3(4) . . ?
C40 N8 C36 117.2(5) . . ?
C40 N8 Ru2 125.8(4) . . ?
C36 N8 Ru2 116.7(4) . . ?
C47 N9 C53 110.7(5) . . ?
C47 N9 C46 128.2(5) . . ?
C53 N9 C46 121.0(5) . . ?
C47 N10 C48 112.6(5) . . ?
C47 N10 H10 123.7 . . ?
C48 N10 H10 123.7 . . ?
C56 N11 C58 112.0(5) . . ?
C56 N11 C55 125.2(5) . . ?
C58 N11 C55 122.0(5) . . ?
C56 N12 C57 111.8(5) . . ?
C56 N12 H12 124.1 . . ?
C57 N12 H12 124.1 . . ?
C26 P1 C11 103.1(3) . . ?
C26 P1 C17 104.6(3) . . ?
C11 P1 C17 103.2(3) . . ?
C26 P1 Ru1 115.2(2) . . ?
C11 P1 Ru1 116.17(18) . . ?
C17 P1 Ru1 113.0(2) . . ?
C45 P2 C54 104.8(3) . . ?
C45 P2 C63 104.2(3) . . ?
C54 P2 C63 104.6(3) . . ?
C45 P2 Ru2 111.8(2) . . ?
C54 P2 Ru2 115.2(2) . . ?
C63 P2 Ru2 114.93(18) . . ?
C21 Ru1 C30 92.1(2) . . ?
C21 Ru1 N1 96.42(19) . . ?
C30 Ru1 N1 170.82(19) . . ?
C21 Ru1 N2 172.76(19) . . ?
C30 Ru1 N2 94.63(19) . . ?
N1 Ru1 N2 76.69(17) . . ?
C21 Ru1 P1 89.85(17) . . ?
C30 Ru1 P1 92.69(17) . . ?
N1 Ru1 P1 90.67(13) . . ?
N2 Ru1 P1 92.42(13) . . ?
C21 Ru1 Cl1 91.14(17) . . ?
C30 Ru1 Cl1 89.68(17) . . ?
N1 Ru1 Cl1 86.82(13) . . ?
N2 Ru1 Cl1 86.31(13) . . ?
P1 Ru1 Cl1 177.40(5) . . ?
C56 Ru2 C47 90.6(2) . . ?
C56 Ru2 N7 170.8(2) . . ?
C47 Ru2 N7 98.03(19) . . ?
C56 Ru2 N8 95.2(2) . . ?
C47 Ru2 N8 174.00(19) . . ?
N7 Ru2 N8 76.10(18) . . ?
C56 Ru2 P2 92.29(18) . . ?
C47 Ru2 P2 90.12(16) . . ?
N7 Ru2 P2 91.08(13) . . ?
N8 Ru2 P2 91.21(13) . . ?
C56 Ru2 Cl2 91.98(18) . . ?
C47 Ru2 Cl2 90.31(16) . . ?
N7 Ru2 Cl2 84.63(13) . . ?
N8 Ru2 Cl2 87.93(13) . . ?
P2 Ru2 Cl2 175.71(6) . . ?

# SQUEEZE RESULTS (APPEND TO CIF)
# Note: Data are Listed for all Voids in the P1 Unit Cell
# i.e. Centre of Gravity, Solvent Accessible Volume,
# Recovered number of Electrons in the Void and
# Details about the Squeezed Material
loop_
  _platon_squeeze_void_nr
  _platon_squeeze_void_average_x
  _platon_squeeze_void_average_y
  _platon_squeeze_void_average_z
  _platon_squeeze_void_volume
  _platon_squeeze_void_count_electrons
  _platon_squeeze_void_content
   1  0.500  0.000  0.500       269       125 ' '
   2  1.000  0.000  0.500       333       146 ' '
   3  1.000  0.500  1.000       269       125 ' '
   4  0.500  0.500  0.000       333       145 ' '
_platon_squeeze_details
;
;

_iucr_refine_instructions_details
;
TITL MN2_020b_0m in P2(1)/n orange prism M Norris data BF str WK
CELL  0.71073  25.6189  11.1698  26.1500   90.000  110.045   90.000
ZERR     4.00   0.0016   0.0006   0.0016    0.000    0.003    0.000
LATT   1
SYMM  1/2 - X, 1/2 + Y, 1/2 - Z
SFAC  C    H    N    P    CL   RU
UNIT  272  248  48   8    16   8
MERG   2
OMIT     0   1   1
OMIT   -10   9   6
OMIT     2   1   1
OMIT    -1   2   2
OMIT     1   1   1
OMIT     1   2   2
OMIT   -16   9   6
OMIT   -10   6   3
OMIT    11   4   7
OMIT   -20   3   8
OMIT    -2   2   3
OMIT    -6   6  21
OMIT   -18   7  21
OMIT   -18   4   6
OMIT    -9   2  24
OMIT     2   1   2
OMIT    -4   9   4
OMIT   -24   2   9
OMIT     0   6   7
OMIT    -9   1  27
OMIT    -9   2  26
OMIT    -6   6   1
OMIT    -2   1   3
OMIT    -6   1  20
OMIT    19   3   5
OMIT    -1   2   4
OMIT   -21   4   4
OMIT    12   0  14
OMIT    -5   2  12
OMIT   -23   3   9
OMIT    -5   6  14
OMIT    -2   1   1
OMIT    -9   2  22
OMIT    11   2  17
OMIT     3   0   5
OMIT   -11   1  26
OMIT    10   2   2
OMIT     0   0   2
OMIT    -4   6   1
OMIT    -4   0   4
OMIT    -3   9  11
OMIT    -4   1  10
OMIT     4   0   2
OMIT   -20   6  11
OMIT   -12   3   4
OMIT     4   2  19
OMIT    -6   2  17
OMIT     1   4   6
OMIT    -3   5  22
OMIT   -25   3  13
ISOR 0.007 C47 C11 C14 C28 C58 C66 C50
FMAP   2
PLAN   20
SIZE     0.01   0.06   0.53
ACTA    50.00
BOND   $H
WPDB  -2
WGHT     0.06250    14.91860
L.S.   4
TEMP  -173.00
FVAR     0.66888
C1    1    0.248013   -0.005781    0.189061    11.00000    0.02144    0.02090 =
        0.01693   -0.00016    0.00791    0.00092
AFIX   43
H1    2    0.274497   -0.067200    0.191840    11.00000   -1.20000
AFIX    0
C2    1    0.195651   -0.037967    0.188535    11.00000    0.01827    0.02708 =
        0.01922   -0.00087    0.00722   -0.00641
AFIX   43
H2    2    0.187168   -0.119499    0.192468    11.00000   -1.20000
AFIX    0
C3    1    0.155951    0.049382    0.182253    11.00000    0.01272    0.03970 =
        0.02390   -0.00538    0.00814   -0.00659
AFIX   43
H3A   2    0.119146    0.029353    0.179854    11.00000   -1.20000
AFIX    0
C4    1    0.171489    0.167476    0.179547    11.00000    0.01411    0.03155 =
        0.02984    0.00130    0.00816   -0.00197
AFIX   43
H4    2    0.145462    0.230036    0.176457    11.00000   -1.20000
AFIX    0
C5    1    0.224837    0.194463    0.181336    11.00000    0.02237    0.01858 =
        0.00513   -0.00136    0.00662    0.00213
C6    1    0.244056    0.318235    0.179275    11.00000    0.01493    0.02738 =
        0.01070    0.00150    0.00129    0.00480
C7    1    0.318597    0.437938    0.180759    11.00000    0.02254    0.01468 =
        0.01903    0.00332    0.00496    0.00323
AFIX   43
H7    2    0.356091    0.444744    0.182368    11.00000   -1.20000
AFIX    0
C8    1    0.288176    0.541344    0.178410    11.00000    0.02890    0.01968 =
        0.02251    0.00437    0.00850    0.00252
AFIX   43
H8    2    0.304535    0.617943    0.179153    11.00000   -1.20000
AFIX    0
C9    1    0.233321    0.530274    0.174953    11.00000    0.02541    0.01822 =
        0.02781    0.00932    0.00906    0.01499
AFIX   43
H9    2    0.211033    0.599549    0.172309    11.00000   -1.20000
AFIX    0
C10   1    0.211277    0.418149    0.175374    11.00000    0.01384    0.03186 =
        0.01757    0.00002    0.00650    0.00391
AFIX   43
H10A  2    0.173620    0.409557    0.172987    11.00000   -1.20000
AFIX    0
C11   1    0.235230    0.202605    0.058472    11.00000    0.01963    0.01930 =
        0.00782   -0.00285    0.00883   -0.00058
C12   1    0.219536    0.320352    0.043048    11.00000    0.02581    0.02177 =
        0.02145    0.00332    0.00370   -0.00382
AFIX   43
H12A  2    0.247306    0.378495    0.045318    11.00000   -1.20000
AFIX    0
C13   1    0.164091    0.354080    0.024448    11.00000    0.03578    0.03400 =
        0.04319    0.01033    0.00225    0.01618
AFIX   43
H13   2    0.154096    0.434997    0.014723    11.00000   -1.20000
AFIX    0
C14   1    0.123280    0.269174    0.020101    11.00000    0.02351    0.05705 =
        0.02777    0.00252    0.00591    0.01619
AFIX   43
H14   2    0.085175    0.291340    0.006806    11.00000   -1.20000
AFIX    0
C15   1    0.138490    0.151280    0.035335    11.00000    0.02087    0.04374 =
        0.01924   -0.00670    0.00303   -0.00640
AFIX   43
H15   2    0.110807    0.092609    0.032567    11.00000   -1.20000
AFIX    0
C16   1    0.193716    0.120177    0.054391    11.00000    0.01729    0.03005 =
        0.01572   -0.00157    0.00140    0.00495
AFIX   43
H16   2    0.203677    0.039692    0.065075    11.00000   -1.20000
AFIX    0
C17   1    0.344240    0.266092    0.060671    11.00000    0.02466    0.04707 =
        0.01953    0.00354    0.00859   -0.00398
AFIX   23
H17A  2    0.330003    0.255158    0.020680    11.00000   -1.20000
H17B  2    0.335621    0.349097    0.068420    11.00000   -1.20000
AFIX    0
C18   1    0.405899    0.249733    0.081092    11.00000    0.02879    0.06030 =
        0.02336   -0.00242    0.01887   -0.01287
AFIX   23
H18A  2    0.414527    0.167183    0.072725    11.00000   -1.20000
H18B  2    0.422358    0.305533    0.061405    11.00000   -1.20000
AFIX    0
C19   1    0.483319    0.326925    0.160496    11.00000    0.01206    0.01687 =
        0.04502    0.00465    0.00886   -0.00037
C20   1    0.494092    0.338864    0.215621    11.00000    0.01467    0.01322 =
        0.03781    0.00566    0.00207    0.00360
C21   1    0.410977    0.241567    0.179534    11.00000    0.02100    0.00795 =
        0.01600   -0.00121    0.00446    0.00560
C22   1    0.541723    0.397507    0.249944    11.00000    0.02027    0.02175 =
        0.03871    0.00502    0.00061   -0.00156
AFIX   43
H22   2    0.549523    0.405324    0.288019    11.00000   -1.20000
AFIX    0
C23   1    0.576275    0.442826    0.224302    11.00000    0.01868    0.02371 =
        0.06225   -0.00925    0.00756   -0.01359
AFIX   43
H23   2    0.608786    0.484588    0.245529    11.00000   -1.20000
AFIX    0
C24   1    0.565828    0.430345    0.169155    11.00000    0.02380    0.03479 =
        0.05961    0.00876    0.01603   -0.00325
AFIX   43
H24   2    0.591567    0.462944    0.154034    11.00000   -1.20000
AFIX    0
C25   1    0.519196    0.372035    0.135136    11.00000    0.02479    0.03163 =
        0.04726    0.00635    0.01416   -0.00019
AFIX   43
H25   2    0.512044    0.363252    0.097205    11.00000   -1.20000
AFIX    0
C26   1    0.312996    0.019005    0.060997    11.00000    0.02925    0.02098 =
        0.01316   -0.00652   -0.00078    0.00908
AFIX   23
H26A  2    0.281260   -0.031366    0.061168    11.00000   -1.20000
H26B  2    0.309792    0.031694    0.022569    11.00000   -1.20000
AFIX    0
C27   1    0.366753   -0.048124    0.089983    11.00000    0.02841    0.04283 =
        0.01001    0.00538    0.00843    0.01663
AFIX   23
H27A  2    0.366799   -0.123428    0.070032    11.00000   -1.20000
H27B  2    0.398377    0.001039    0.088553    11.00000   -1.20000
AFIX    0
C28   1    0.397722   -0.187894    0.169649    11.00000    0.01588    0.00781 =
        0.03075    0.00341    0.00581    0.00398
C29   1    0.407995   -0.180034    0.224783    11.00000    0.01198    0.01753 =
        0.02295    0.00561    0.00526   -0.00053
C30   1    0.372475   -0.000628    0.186185    11.00000    0.01058    0.02042 =
        0.01740   -0.00285    0.00490   -0.00156
C31   1    0.430131   -0.274051    0.259865    11.00000    0.01256    0.02122 =
        0.02756    0.01025    0.00802   -0.00469
AFIX   43
H31   2    0.437160   -0.268509    0.297895    11.00000   -1.20000
AFIX    0
C32   1    0.441353   -0.376503    0.236029    11.00000    0.02077    0.01027 =
        0.03072    0.00038    0.00720   -0.00257
AFIX   43
H32   2    0.456306   -0.443930    0.258397    11.00000   -1.20000
AFIX    0
C33   1    0.431788   -0.384464    0.181682    11.00000    0.01308    0.01648 =
        0.04577   -0.00052    0.00813    0.00632
AFIX   43
H33   2    0.440943   -0.456586    0.167442    11.00000   -1.20000
AFIX    0
C34   1    0.408953   -0.289986    0.146224    11.00000    0.01914    0.02710 =
        0.02849   -0.00856    0.00229    0.00264
AFIX   43
H34   2    0.401624   -0.295992    0.108158    11.00000   -1.20000
AFIX    0
C35   1    0.684191    0.845713    0.248317    11.00000    0.01008    0.03002 =
        0.01443    0.00284    0.00422    0.00004
C36   1    0.678134    0.969498    0.227458    11.00000    0.01345    0.01827 =
        0.02310    0.00064    0.00613   -0.00142
C37   1    0.671831    0.998056    0.174791    11.00000    0.02437    0.03073 =
        0.01792   -0.00034    0.00522    0.00508
AFIX   43
H37   2    0.671344    0.936756    0.149448    11.00000   -1.20000
AFIX    0
C38   1    0.666185    1.116488    0.158695    11.00000    0.02563    0.05027 =
        0.01200    0.01225    0.00242   -0.00589
AFIX   43
H38   2    0.661219    1.137306    0.122102    11.00000   -1.20000
AFIX    0
C39   1    0.667818    1.203524    0.196016    11.00000    0.01859    0.03271 =
        0.01950    0.01133    0.00251    0.00139
AFIX   43
H39   2    0.665520    1.285791    0.186272    11.00000   -1.20000
AFIX    0
C40   1    0.672857    1.169118    0.247858    11.00000    0.01749    0.03114 =
        0.02170    0.00429    0.00467    0.00076
AFIX   43
H40   2    0.672863    1.229563    0.273418    11.00000   -1.20000
AFIX    0
C41   1    0.688420    0.747032    0.217162    11.00000    0.01179    0.02984 =
        0.01756   -0.00464    0.00663   -0.00411
AFIX   43
H41   2    0.687504    0.757274    0.180800    11.00000   -1.20000
AFIX    0
C42   1    0.693954    0.634332    0.240118    11.00000    0.02035    0.02234 =
        0.02227   -0.01077    0.00800   -0.00311
AFIX   43
H42   2    0.696573    0.565963    0.219523    11.00000   -1.20000
AFIX    0
C43   1    0.695656    0.621641    0.293101    11.00000    0.01577    0.02366 =
        0.02337   -0.00283    0.00536    0.00241
AFIX   43
H43   2    0.699700    0.544762    0.309544    11.00000   -1.20000
AFIX    0
C44   1    0.691384    0.722554    0.321820    11.00000    0.01660    0.02328 =
        0.01224    0.00154    0.01100    0.00061
AFIX   43
H44   2    0.692611    0.713821    0.358351    11.00000   -1.20000
AFIX    0
C45   1    0.562496    0.853765    0.342176    11.00000    0.02465    0.02445 =
        0.03366    0.00769    0.00999   -0.00683
AFIX   23
H45A  2    0.521409    0.850667    0.327117    11.00000   -1.20000
H45B  2    0.576768    0.777544    0.332801    11.00000   -1.20000
AFIX    0
C46   1    0.580527    0.864100    0.403064    11.00000    0.01894    0.03358 =
        0.02502    0.00777    0.00553    0.00298
AFIX   23
H46A  2    0.564241    0.937875    0.412277    11.00000   -1.20000
H46B  2    0.565293    0.795267    0.417241    11.00000   -1.20000
AFIX    0
C47   1    0.680435    0.915642    0.412413    11.00000    0.01726    0.00768 =
        0.01439   -0.00687    0.00038    0.00144
C48   1    0.721235    0.844541    0.498277    11.00000    0.02768    0.01087 =
        0.01733   -0.00318    0.00782   -0.00225
C49   1    0.757422    0.807462    0.548407    11.00000    0.03589    0.03039 =
        0.01747   -0.00022   -0.00189   -0.00327
AFIX   43
H49   2    0.796229    0.822254    0.559371    11.00000   -1.20000
AFIX    0
C50   1    0.734277    0.748025    0.581570    11.00000    0.04740    0.02131 =
        0.01264    0.00244    0.00544    0.00140
AFIX   43
H50   2    0.758191    0.719395    0.615789    11.00000   -1.20000
AFIX    0
C51   1    0.677584    0.728075    0.567243    11.00000    0.05077    0.02077 =
        0.02344   -0.00176    0.02015   -0.00707
AFIX   43
H51   2    0.663402    0.687894    0.591718    11.00000   -1.20000
AFIX    0
C52   1    0.641560    0.766959    0.517027    11.00000    0.03038    0.02246 =
        0.01780    0.00158    0.00948   -0.00489
AFIX   43
H52   2    0.602568    0.755089    0.506428    11.00000   -1.20000
AFIX    0
C53   1    0.664993    0.823409    0.483405    11.00000    0.02753    0.01550 =
        0.00967    0.00346    0.00577    0.00218
C54   1    0.549123    1.106446    0.321078    11.00000    0.01958    0.02988 =
        0.02130   -0.00364    0.00467    0.00305
AFIX   23
H54A  2    0.543399    1.162535    0.290320    11.00000   -1.20000
H54B  2    0.512042    1.080891    0.320850    11.00000   -1.20000
AFIX    0
C55   1    0.578716    1.172872    0.374256    11.00000    0.02600    0.02714 =
        0.02372   -0.00022    0.01153    0.00229
AFIX   23
H55A  2    0.554925    1.239900    0.377850    11.00000   -1.20000
H55B  2    0.583617    1.117565    0.405140    11.00000   -1.20000
AFIX    0
C56   1    0.675011    1.154694    0.371933    11.00000    0.02516    0.02238 =
        0.01163    0.00522    0.00608    0.00616
C57   1    0.705595    1.343091    0.402372    11.00000    0.04211    0.01612 =
        0.01363    0.00578    0.00749    0.00358
C58   1    0.649637    1.334832    0.396403    11.00000    0.03554    0.02027 =
        0.00927   -0.00481    0.00270    0.00110
C59   1    0.620746    1.431003    0.406813    11.00000    0.04746    0.02998 =
        0.01250   -0.00077    0.00477    0.01024
AFIX   43
H59   2    0.582304    1.426583    0.401936    11.00000   -1.20000
AFIX    0
C60   1    0.652063    1.535760    0.425098    11.00000    0.07147    0.01181 =
        0.02587    0.00009    0.00493    0.00747
AFIX   43
H60   2    0.634136    1.604455    0.432736    11.00000   -1.20000
AFIX    0
C61   1    0.707429    1.542113    0.432256    11.00000    0.05447    0.01000 =
        0.01989    0.00134   -0.00189   -0.00375
AFIX   43
H61   2    0.726808    1.614415    0.445685    11.00000   -1.20000
AFIX    0
C62   1    0.736399    1.446973    0.420653    11.00000    0.04734    0.02125 =
        0.01453    0.00083    0.00658   -0.01079
AFIX   43
H62   2    0.774667    1.452363    0.424897    11.00000   -1.20000
AFIX    0
C63   1    0.555684    0.945188    0.237526    11.00000    0.00591    0.02404 =
        0.02221   -0.00051    0.00611    0.00145
C64   1    0.551612    0.827984    0.218527    11.00000    0.02440    0.02206 =
        0.02096    0.00442    0.00839   -0.00088
AFIX   43
H64   2    0.559661    0.763401    0.243678    11.00000   -1.20000
AFIX    0
C65   1    0.535954    0.804628    0.163363    11.00000    0.01996    0.03666 =
        0.02902   -0.01056    0.01015   -0.00730
AFIX   43
H65   2    0.534252    0.724472    0.150746    11.00000   -1.20000
AFIX    0
C66   1    0.522781    0.898563    0.126639    11.00000    0.01912    0.05322 =
        0.01617   -0.00555    0.00549   -0.00194
AFIX   43
H66   2    0.511721    0.882720    0.088714    11.00000   -1.20000
AFIX    0
C67   1    0.525628    1.014805    0.144805    11.00000    0.01744    0.04869 =
        0.02059    0.00485    0.00349    0.01204
AFIX   43
H67   2    0.516104    1.079125    0.119513    11.00000   -1.20000
AFIX    0
C68   1    0.542471    1.037557    0.200216    11.00000    0.01530    0.02958 =
        0.01966    0.00339    0.00539    0.00582
AFIX   43
H68   2    0.544955    1.117944    0.212693    11.00000   -1.20000
AFIX    0
N1    3    0.297272    0.328888    0.180850    11.00000    0.01221    0.02166 =
        0.00924    0.00153   -0.00161    0.00241
N2    3    0.263006    0.107961    0.185831    11.00000    0.01487    0.01725 =
        0.01067   -0.00239    0.00490   -0.00418
N3    3    0.449366    0.286346    0.225741    11.00000    0.01144    0.01664 =
        0.02147    0.00398    0.00039    0.00421
AFIX   43
H3    2    0.446192    0.282447    0.258159    11.00000   -1.20000
AFIX    0
N4    3    0.431703    0.270444    0.139505    11.00000    0.01767    0.01904 =
        0.02226   -0.00151    0.00710    0.00061
N5    3    0.392201   -0.062826    0.233304    11.00000    0.01099    0.01893 =
        0.01654   -0.00151    0.00789   -0.00078
AFIX   43
H5    2    0.394856   -0.033710    0.265369    11.00000   -1.20000
AFIX    0
N6    3    0.375414   -0.077130    0.146834    11.00000    0.01415    0.01861 =
        0.01351    0.00121    0.00401    0.00659
N7    3    0.685539    0.832992    0.299928    11.00000    0.01854    0.01733 =
        0.01672   -0.00154    0.00566    0.00282
N8    3    0.677806    1.053929    0.264481    11.00000    0.01833    0.01556 =
        0.01964    0.00294    0.00747   -0.00367
N9    3    0.640849    0.867477    0.430717    11.00000    0.01341    0.01787 =
        0.01257    0.00691    0.00435    0.00361
N10   3    0.728599    0.901374    0.454455    11.00000    0.01669    0.02261 =
        0.00995    0.00367    0.00007   -0.00005
AFIX   43
H10   2    0.761078    0.925685    0.453911    11.00000   -1.20000
AFIX    0
N11   3    0.632836    1.220131    0.377679    11.00000    0.02318    0.01910 =
        0.01845   -0.00410    0.00822   -0.00111
N12   3    0.719689    1.231370    0.387418    11.00000    0.02362    0.02373 =
        0.01609    0.00238    0.00658   -0.00606
AFIX   43
H12   2    0.753141    1.212149    0.387827    11.00000   -1.20000
AFIX    0
P1    4    0.308157    0.162188    0.091137    11.00000    0.01479    0.01589 =
        0.01437   -0.00004    0.00446    0.00158
P2    4    0.586292    0.975990    0.310275    11.00000    0.01542    0.01478 =
        0.01281    0.00141    0.00391    0.00124
CL1   5    0.373731    0.177850    0.284009    11.00000    0.02191    0.02500 =
        0.01572   -0.00114    0.00584    0.00198
CL2   5    0.782517    0.994845    0.373341    11.00000    0.02063    0.03282 =
        0.02500   -0.00027    0.00890   -0.00559
CL3   5    0.396836   -0.004802   -0.024052    11.00000    0.04791    0.11629 =
        0.03327    0.02318    0.02198    0.02428
CL4   5    0.487205    0.624420    0.411467    11.00000    0.02477    0.07642 =
        0.02856    0.00588    0.00682   -0.01738
RU1   6    0.340246    0.166219    0.181008    11.00000    0.01232    0.01346 =
        0.01324   -0.00117    0.00484    0.00124
RU2   6    0.677828    0.991590    0.341410    11.00000    0.01456    0.01422 =
        0.01424    0.00072    0.00466   -0.00086
HKLF    4  1.0  1.00  0.00  0.00  0.00  1.00  0.00  0.00  0.00  1.00
END
;
 
# END of CIF

#\#CIF_1.1
 
#  CIF produced by WinGX routine CIF_UPDATE
#  Created on 2016-05-31 at 17:14:56
#  Using CIFtbx version 2.6.2 16 Jun 1998
 
#  Dictionary name : cif_core.dic
#  Dictionary vers : 2.4
#  Request file    : c:\wingx\files\archive.reqdat
#  CIF files read  : sef2_142_0ma struct
 
#------------------ SECTION 1. GLOBAL INFORMATION ---------------------------#
 
data_global
 
#------------------ AUDIT DETAILS -------------------------------------------#
 
_audit_creation_date            2016-05-31
_audit_creation_method          'WinGX routine CIF_UPDATE'
_audit_conform_dict_name        cif_core.dic
_audit_conform_dict_version     2.4
_audit_conform_dict_location    ftp://ftp.iucr.org/pub/cif_core.dic
_audit_update_record            ?
 
#------------------ AUTHOR DETAILS -------------------------------------------#
 
# Name and address of author for correspondence
 
_publ_contact_author_name      'Werner Kaminsky'
_publ_contact_author_address
;
Department of Chemistry
University of Washington
Seattle
Washington, 98195, USA
;
_publ_contact_author_email       kaminsky@chem.washington.edu
_publ_contact_author_fax         '00(206)6858665'
_publ_contact_author_phone       '00(206)5437585'
 
 
_publ_requested_journal 'Journal title here'
_publ_section_title
;
title here
;
 
loop_
_publ_author_name
_publ_author_address
'Sarah Flowers'
;
Department of Chemistry Univ. of Washington Seattle, WA 98195 USA
;
'Werner Kaminsky'
;
Department of Chemistry Univ. of Washington Seattle, WA 98195 USA
;
'Brandi Cossairt'
;
Department of Chemistry Univ. of Washington Seattle, WA 98195 USA
;
 
_publ_section_abstract
;
Abstract here
;
_publ_section_comment
;
Details and comments here
;
 
_publ_section_exptl_prep
;
details of preparation here
;
 
_publ_section_exptl_refinement
;
 All H atoms were initially located in a difference Fourier map and were
 refined with a riding  model. H atoms were placed in geometrically
 idealised positions and constrained to ride on their parent atoms with
 C---H distances in the range 0.95-1.00 \%A. U~iso~ values were fixed
 such that they were 1.2U~eq~ of their parent atom U~eq~ for CH's and
 1.5U~eq~ of their parent atom U~eq~ in case of methyl groups.
;
 
 
# Insert blank lines between references
 
_publ_section_references
;
 
 
Bruker (2007) APEX2 (Version 2.1-4), SAINT (version 7.34A), SADABS
(version 2007/4), BrukerAXS Inc, Madison, Wisconsin, USA.
 
Flack H. D. & Bernardinelli, G. (71999). Acta Cryst. A55, 908-915.
 
Flack H. D. & Bernardinelli, G. (2000). J. Appl. Cryst. 33, 1143-1148.
 
Cambridge Structural Database: Allen, F. R. (2002). Acta Cryst. B58, 380-388.
 
CrysAlis CCD, CrysAlis RED and associated programs: Oxford Diffraction (2006).
Program name(s). Oxford Diffraction Ltd, Abingdon, England.
 
COLLECT: Nonius [or Hooft, R. W. W.] (1998). COLLECT. Nonius BV, Delft,
The Netherlands.
 
DENZO/SCALEPACK:  Otwinowski, Z. & Minor, W. (1997). Methods in Enzymology,
Vol. 276, Macromolecular Crystallography, Part A, edited by C. W. Carter Jr
& R. M. Sweet, pp. 307-326. New York: Academic Press.
 
DIRDIF99: Beurskens, P.T., Beurskens, G., de Gelder, R., Garci\'ia-Granda,
S., Gould, R.O., Israel, R. & Smits, J.M.M. (1999) The DIRDIF-99 program
system, Technical Report of the Crystallography Laboratory, University of
Nijmegen, The Netherlands.
 
ORTEP-3: Farrugia, L. J. (1997). J. Appl. Cryst. 30, 565.
 
PARST: Nardelli, M. (1995). J. Appl. Cryst. 28, 659.
 
PLATON: Spek, A. L. (2003). J. Appl. Cryst. 36, 7-13.
 
publCIF: Westrip, S. P. (2008). publCIF. In preparation.
 
SADABS, TWINABS: Bruker (2001). Program name. Bruker AXS Inc., Madison,
Wisconsin, USA. or Sheldrick, G. M. (1996). Program name. University of
G�ttingen, Germany.
 
SHELX Sheldrick, G. M. (2008). Acta Cryst. A64, 112-122.
 
SIR97: Altomare, A., Burla, M. C., Camalli, M., Cascarano, G. L.,
Giacovazzo, C., Guagliardi, A., Moliterni, A. G. G., Polidori, G. &
Spagna, R. (1999). J. Appl. Cryst. 32, 115-119.
 
SIR2002: Burla, M. C., Camalli, M., Carrozzini, B., Cascarano, G. L.,
Giacovazzo, C., Polidori, G. & Spagna, R. (2003). J. Appl. Cryst. 36, 1103.
 
WinGX: Farrugia, L. J. (1999). J. Appl. Cryst. 32, 837-838.
;
 
#------------------  SECTION 2. COMPOUND(S) DETAILS -------------------------#
 
data_sef2_142_0ma
 
_audit_creation_date                    2016-05-31T17:14:56-00:00
_audit_creation_method                  'WinGX routine CIF_UPDATE'
_audit_conform_dict_name                cif_core.dic
_audit_conform_dict_version             2.4
_audit_conform_dict_location            ftp://ftp.iucr.org/pub/cif_core.dic
_publ_requested_category                FM
 
#----------------------------------------------------------------------------#
#                   CHEMICAL INFORMATION                                     #
#----------------------------------------------------------------------------#
 
_chemical_name_systematic
;
 sef2_142_0ma
;
_chemical_name_common                   sef2_142
_chemical_formula_moiety
                                    'C69 H63 N12 O2 P2 Ru2, 3(F6 P), 2(C H2 Cl2'
_chemical_formula_sum                   'C71 H67 Cl4 F18 N12 O2 P5 Ru2'
_chemical_formula_weight                1961.16
_chemical_compound_source               'synthesis as described'
 
#----------------------------------------------------------------------------#
#                   UNIT CELL INFORMATION                                    #
#----------------------------------------------------------------------------#
 
_symmetry_cell_setting                  monoclinic
_symmetry_space_group_name_H-M          'C 1 2/c 1'
_symmetry_space_group_name_Hall         '-C 2yc'
_symmetry_Int_Tables_number             15
loop_
    _symmetry_equiv_pos_as_xyz
'x, y, z'
'-x, y, -z+1/2'
'x+1/2, y+1/2, z'
'-x+1/2, y+1/2, -z+1/2'
'-x, -y, -z'
'x, -y, z-1/2'
'-x+1/2, -y+1/2, -z'
'x+1/2, -y+1/2, z-1/2'
 
_cell_length_a                          27.5062(15)
_cell_length_b                          12.3658(6)
_cell_length_c                          24.5908(13)
_cell_angle_alpha                       90
_cell_angle_beta                        110.471(5)
_cell_angle_gamma                       90
_cell_volume                            7836.0(7)
_cell_formula_units_Z                   4
_cell_measurement_temperature           100(2)
_cell_measurement_reflns_used           7297
_cell_measurement_theta_min             3
_cell_measurement_theta_max             20
_cell_measurement_wavelength            0.71073
 
#----------------------------------------------------------------------------#
#                   CRYSTAL INFORMATION                                      #
#----------------------------------------------------------------------------#
 
_exptl_crystal_description              prism
_exptl_crystal_colour                   orange
_exptl_crystal_size_max                 0.15
_exptl_crystal_size_mid                 0.1
_exptl_crystal_size_min                 0.08
_exptl_crystal_density_diffrn           1.662
_exptl_crystal_density_method           'not measured'
_exptl_crystal_F_000                    3944
_exptl_special_details
;
 10 sec, 40.00 mm, 0.5 degrees, 100 K
;
 
#----------------------------------------------------------------------------#
#                   ABSORPTION CORRECTION                                    #
#----------------------------------------------------------------------------#
 
_exptl_absorpt_coefficient_mu           0.721
_exptl_absorpt_correction_type          multi-scan
_exptl_absorpt_process_details          '(SADABS; Bruker, 2007)'
_exptl_absorpt_correction_T_min   0.8995
_exptl_absorpt_correction_T_max   0.9446
 
#----------------------------------------------------------------------------#
#                   DATA COLLECTION                                          #
#----------------------------------------------------------------------------#
 
_diffrn_ambient_temperature             100(2)
_diffrn_radiation_wavelength            0.71073
_diffrn_radiation_type                  MoK\a
_diffrn_source                          'fine-focus sealed tube'
_diffrn_radiation_monochromator         graphite
_diffrn_radiation_probe                 x-ray
_diffrn_measurement_device_type         'Bruker APEXII CCD area-detector'
_diffrn_measurement_method              '\f and \w scans'
_diffrn_reflns_av_R_equivalents         0.0668
_diffrn_reflns_av_unetI/netI            0.0281
_diffrn_reflns_number                   160385
_diffrn_reflns_limit_h_min              -33
_diffrn_reflns_limit_h_max              33
_diffrn_reflns_limit_k_min              -14
_diffrn_reflns_limit_k_max              14
_diffrn_reflns_limit_l_min              -29
_diffrn_reflns_limit_l_max              30
_diffrn_reflns_theta_min                1.58
_diffrn_reflns_theta_max                25.69
_diffrn_reflns_theta_full               25
_diffrn_measured_fraction_theta_full
                                        0.995
_diffrn_measured_fraction_theta_max
                                        0.978
_reflns_number_total                    7297
_reflns_number_gt                       6391
_reflns_threshold_expression            >2\s(I)
 
#----------------------------------------------------------------------------#
#                   COMPUTER PROGRAMS USED                                   #
#----------------------------------------------------------------------------#
 
_computing_data_collection              'APEX2 (Bruker, 2007)'
_computing_cell_refinement              'SAINT (Bruker, 2007)'
_computing_data_reduction               'SAINT (Bruker, 2007)'
_computing_structure_solution           'SHELXS97 (Sheldrick, 1997)'
_computing_structure_refinement         'SHELXL-97 (Sheldrick, 2008)'
_computing_molecular_graphics           'Ortep-3 for Windows (Farrugia, 1997)'
_computing_publication_material
                                   'WinGX publication routines (Farrugia, 1999)'
 
#----------------------------------------------------------------------------#
#                   STRUCTURE SOLUTION
#----------------------------------------------------------------------------#
 
_atom_sites_solution_primary            direct
_atom_sites_solution_secondary          difmap
_atom_sites_solution_hydrogens          geom
 
#----------------------------------------------------------------------------#
#                   REFINEMENT INFORMATION                                   #
#----------------------------------------------------------------------------#
 
_refine_special_details
;
 Refinement of F^2^ against ALL reflections.  The weighted R-factor wR and
 goodness of fit S are based on F^2^, conventional R-factors R are based
 on F, with F set to zero for negative F^2^. The threshold expression of
 F^2^ > 2\s(F^2^) is used only for calculating R-factors(gt) etc. and is
 not relevant to the choice of reflections for refinement.  R-factors based
 on F^2^ are statistically about twice as large as those based on F, and R-
 factors based on ALL data will be even larger.
;
_refine_ls_structure_factor_coef        Fsqd
_refine_ls_matrix_type                  full
_refine_ls_weighting_scheme             calc
_refine_ls_weighting_details
        'calc w=1/[\s^2^(Fo^2^)+(0.0329P)^2^+77.3686P] where P=(Fo^2^+2Fc^2^)/3'
_refine_ls_hydrogen_treatment           mixed
_refine_ls_extinction_method            none
_refine_ls_number_reflns                7297
_refine_ls_number_parameters            531
_refine_ls_number_restraints            3
_refine_ls_R_factor_all                 0.0651
_refine_ls_R_factor_gt                  0.0544
_refine_ls_wR_factor_ref                0.1209
_refine_ls_wR_factor_gt                 0.1162
_refine_ls_goodness_of_fit_ref          1.085
_refine_ls_restrained_S_all             1.086
_refine_ls_shift/su_max                 0.002
_refine_ls_shift/su_mean                0
_refine_diff_density_max                1.251
_refine_diff_density_min                -1.141
_refine_diff_density_rms                0.098
 
#----------------------------------------------------------------------------#
#                   ATOMIC TYPES, COORDINATES AND THERMAL PARAMETERS         #
#----------------------------------------------------------------------------#
 
loop_
    _atom_type_symbol
    _atom_type_description
    _atom_type_scat_dispersion_real
    _atom_type_scat_dispersion_imag
    _atom_type_scat_source
C C 0.0033 0.0016 'International Tables Vol C Tables 4.2.6.8 and 6.1.1.4'
H H 0 0 'International Tables Vol C Tables 4.2.6.8 and 6.1.1.4'
N N 0.0061 0.0033 'International Tables Vol C Tables 4.2.6.8 and 6.1.1.4'
O O 0.0106 0.006 'International Tables Vol C Tables 4.2.6.8 and 6.1.1.4'
F F 0.0171 0.0103 'International Tables Vol C Tables 4.2.6.8 and 6.1.1.4'
P P 0.1023 0.0942 'International Tables Vol C Tables 4.2.6.8 and 6.1.1.4'
Cl Cl 0.1484 0.1585 'International Tables Vol C Tables 4.2.6.8 and 6.1.1.4'
Ru Ru -1.2594 0.8363 'International Tables Vol C Tables 4.2.6.8 and 6.1.1.4'
 
loop_
    _atom_site_label
    _atom_site_type_symbol
    _atom_site_fract_x
    _atom_site_fract_y
    _atom_site_fract_z
    _atom_site_U_iso_or_equiv
    _atom_site_adp_type
    _atom_site_occupancy
    _atom_site_symmetry_multiplicity
    _atom_site_calc_flag
    _atom_site_refinement_flags
    _atom_site_disorder_assembly
    _atom_site_disorder_group
C1 C 0.10190(16) 0.9743(4) 0.40585(19) 0.0251(10) Uani 1 1 d . . .
C2 C 0.07310(17) 0.8174(4) 0.43269(19) 0.0284(10) Uani 1 1 d . . .
C3 C 0.04871(18) 0.7197(4) 0.4341(2) 0.0338(11) Uani 1 1 d . . .
H3 H 0.0205 0.6948 0.4015 0.041 Uiso 1 1 calc R . .
C4 C 0.0673(2) 0.6599(5) 0.4852(2) 0.0417(13) Uani 1 1 d . . .
H4 H 0.0515 0.5928 0.4878 0.05 Uiso 1 1 calc R . .
C5 C 0.1091(2) 0.6973(6) 0.5328(2) 0.0521(16) Uani 1 1 d . . .
H5 H 0.1213 0.6545 0.5669 0.062 Uiso 1 1 calc R . .
C6 C 0.1330(2) 0.7948(5) 0.5313(2) 0.0527(16) Uani 1 1 d . . .
H6 H 0.1612 0.8201 0.5637 0.063 Uiso 1 1 calc R . .
C7 C 0.11380(18) 0.8546(5) 0.4802(2) 0.0378(12) Uani 1 1 d . . .
C8 C 0.1744(2) 1.0127(5) 0.5021(2) 0.0426(14) Uani 1 1 d . . .
H8A H 0.2066 0.9772 0.5017 0.051 Uiso 1 1 calc R . .
H8B H 0.1739 1.0068 0.542 0.051 Uiso 1 1 calc R . .
C9 C 0.17686(19) 1.1315(5) 0.4880(2) 0.0398(13) Uani 1 1 d . . .
H9A H 0.2088 1.1633 0.5162 0.048 Uiso 1 1 calc R . .
H9B H 0.1468 1.1692 0.4927 0.048 Uiso 1 1 calc R . .
C10 C 0.14616(15) 0.9819(3) 0.32141(17) 0.0212(9) Uani 1 1 d . . .
C11 C 0.16332(17) 0.8232(4) 0.28482(18) 0.0258(10) Uani 1 1 d . . .
C12 C 0.1610(2) 0.7211(4) 0.2603(2) 0.0339(11) Uani 1 1 d . . .
H12 H 0.1291 0.683 0.2444 0.041 Uiso 1 1 calc R . .
C13 C 0.2072(2) 0.6777(4) 0.2603(2) 0.0396(12) Uani 1 1 d . . .
H13 H 0.2073 0.6076 0.2445 0.048 Uiso 1 1 calc R . .
C14 C 0.2536(2) 0.7345(5) 0.2827(2) 0.0438(14) Uani 1 1 d . . .
H14 H 0.2846 0.7024 0.2816 0.053 Uiso 1 1 calc R . .
C15 C 0.25574(19) 0.8361(5) 0.3064(2) 0.0394(13) Uani 1 1 d . . .
H15 H 0.2875 0.8747 0.3213 0.047 Uiso 1 1 calc R . .
C16 C 0.20982(17) 0.8796(4) 0.30776(19) 0.0262(10) Uani 1 1 d . . .
C17 C 0.23586(17) 1.0621(4) 0.3544(2) 0.0305(11) Uani 1 1 d . . .
H17A H 0.2271 1.126 0.3285 0.037 Uiso 1 1 calc R . .
H17B H 0.2707 1.0366 0.357 0.037 Uiso 1 1 calc R . .
C18 C 0.23736(16) 1.0957(4) 0.41495(19) 0.0263(10) Uani 1 1 d . . .
H18A H 0.2657 1.1488 0.4313 0.032 Uiso 1 1 calc R . .
H18B H 0.2454 1.0314 0.4406 0.032 Uiso 1 1 calc R . .
C19 C 0.18604(16) 1.2988(4) 0.4110(2) 0.0310(11) Uani 1 1 d . . .
C20 C 0.16244(19) 1.3722(4) 0.4378(2) 0.0406(13) Uani 1 1 d . . .
H20 H 0.1449 1.3451 0.462 0.049 Uiso 1 1 calc R . .
C21 C 0.1641(2) 1.4831(5) 0.4298(3) 0.0516(15) Uani 1 1 d . . .
H21 H 0.1486 1.5317 0.4489 0.062 Uiso 1 1 calc R . .
C22 C 0.1881(2) 1.5204(5) 0.3942(3) 0.0581(19) Uani 1 1 d . . .
H22 H 0.1885 1.5961 0.3879 0.07 Uiso 1 1 calc R . .
C23 C 0.2127(2) 1.4513(5) 0.3661(3) 0.0501(15) Uani 1 1 d . . .
H23 H 0.2296 1.4799 0.3416 0.06 Uiso 1 1 calc R . .
C24 C 0.21165(19) 1.3404(4) 0.3752(2) 0.0371(12) Uani 1 1 d . . .
H24 H 0.2284 1.2926 0.3571 0.044 Uiso 1 1 calc R . .
C25 C 0.03614(18) 1.1860(5) 0.4136(2) 0.0399(13) Uani 1 1 d . . .
H25 H 0.0396 1.1162 0.4307 0.048 Uiso 1 1 calc R . .
C26 C 0.0088(2) 1.2633(6) 0.4313(2) 0.0494(15) Uani 1 1 d . . .
H26 H -0.0069 1.2477 0.4592 0.059 Uiso 1 1 calc R . .
C27 C 0.0054(2) 1.3620(6) 0.4071(2) 0.0511(15) Uani 1 1 d . . .
H27 H -0.0125 1.4177 0.419 0.061 Uiso 1 1 calc R . .
C28 C 0.0271(2) 1.3850(5) 0.3657(2) 0.0459(14) Uani 1 1 d . . .
H28 H 0.0244 1.4552 0.3492 0.055 Uiso 1 1 calc R . .
C29 C 0.05364(18) 1.3004(4) 0.3484(2) 0.0370(12) Uani 1 1 d . . .
C30 C 0.07642(17) 1.3116(4) 0.3036(2) 0.0360(12) Uani 1 1 d . . .
C31 C 0.0759(2) 1.4052(5) 0.2740(2) 0.0425(13) Uani 1 1 d . . .
H31 H 0.0621 1.4695 0.2842 0.051 Uiso 1 1 calc R . .
C32 C 0.0950(2) 1.4066(4) 0.2299(2) 0.0432(13) Uani 1 1 d . . .
H32 H 0.0949 1.4721 0.2096 0.052 Uiso 1 1 calc R . .
C33 C 0.11471(19) 1.3130(5) 0.2142(2) 0.0449(14) Uani 1 1 d . . .
H33 H 0.1266 1.3121 0.1823 0.054 Uiso 1 1 calc R . .
C34 C 0.11640(17) 1.2199(4) 0.2474(2) 0.0339(12) Uani 1 1 d . . .
H34 H 0.1308 1.1554 0.2384 0.041 Uiso 1 1 calc R . .
C35 C 0 1.0588(5) 0.25 0.0229(13) Uani 1 2 d S . .
H35 H 0 1.1356 0.25 0.027 Uiso 1 2 calc SR . .
N1 N 0.06667(13) 0.8930(3) 0.38926(15) 0.0249(8) Uani 1 1 d . . .
H1 H 0.0424 0.8889 0.3547 0.03 Uiso 1 1 calc R . .
N2 N 0.12981(15) 0.9533(4) 0.46286(16) 0.0338(10) Uani 1 1 d . . .
N3 N 0.12589(13) 0.8893(3) 0.29325(15) 0.0228(8) Uani 1 1 d . . .
H3A H 0.0927 0.8729 0.2816 0.027 Uiso 1 1 calc R . .
N4 N 0.19773(13) 0.9762(3) 0.32919(16) 0.0240(8) Uani 1 1 d . . .
N5 N 0.09871(14) 1.2190(3) 0.29063(17) 0.0291(9) Uani 1 1 d . . .
N6 N 0.05836(14) 1.2039(3) 0.37329(17) 0.0333(10) Uani 1 1 d . . .
O1 O 0.03688(11) 1.0126(2) 0.28752(13) 0.0261(7) Uani 1 1 d . . .
F7 F -0.01861(10) 0.7945(2) 0.28470(11) 0.0295(6) Uani 1 1 d . . .
F8 F 0.01821(11) 0.6117(2) 0.21496(12) 0.0349(6) Uani 1 1 d . . .
F9 F 0.05625(10) 0.7035(2) 0.29933(11) 0.0344(6) Uani 1 1 d . . .
P1 P 0.17658(4) 1.15502(10) 0.41467(5) 0.0243(3) Uani 1 1 d . . .
P3 P 0 0.70252(13) 0.25 0.0245(4) Uani 1 2 d S . .
Ru1 Ru 0.105259(12) 1.08967(3) 0.349278(15) 0.02116(11) Uani 1 1 d . . .
C36 C 0.0913(6) 0.9302(18) 0.134(2) 0.084(5) Uani 0.668(5) 1 d PD A 1
H36A H 0.0723 0.9482 0.1608 0.101 Uiso 0.668(5) 1 calc PR A 1
H36B H 0.0951 0.8506 0.1343 0.101 Uiso 0.668(5) 1 calc PR A 1
Cl1 Cl 0.1532(5) 0.989(3) 0.1613(14) 0.083(2) Uani 0.668(5) 1 d PD A 1
Cl2 Cl 0.05350(12) 0.9738(3) 0.06236(14) 0.0750(10) Uani 0.668(5) 1 d PD A 1
C36B C 0.1050(14) 0.922(3) 0.135(5) 0.084(5) Uani 0.332(5) 1 d PD A 2
H36C H 0.1057 0.8564 0.1576 0.101 Uiso 0.332(5) 1 calc PR A 2
H36D H 0.0988 0.9016 0.0938 0.101 Uiso 0.332(5) 1 calc PR A 2
Cl1B Cl 0.1633(10) 0.996(6) 0.164(3) 0.083(2) Uani 0.332(5) 1 d PD A 2
Cl2B Cl 0.0563(2) 1.0155(6) 0.1389(3) 0.087(2) Uani 0.332(5) 1 d PD A 2
P2 P 0.11176(5) 0.62444(13) 0.08930(6) 0.0407(3) Uani 1 1 d . . .
F2 F 0.16343(11) 0.6912(3) 0.12099(15) 0.0519(8) Uani 1 1 d . . .
F4 F 0.05990(12) 0.5600(3) 0.05694(15) 0.0583(10) Uani 1 1 d . . .
F5 F 0.13857(13) 0.5707(3) 0.04798(16) 0.0667(11) Uani 1 1 d . . .
F1 F 0.13399(14) 0.5266(3) 0.13433(16) 0.0611(10) Uani 1 1 d . . .
F3 F 0.09096(14) 0.7234(3) 0.04557(15) 0.0661(10) Uani 1 1 d . . .
F6 F 0.08532(12) 0.6748(3) 0.13127(14) 0.0536(9) Uani 1 1 d . . .
 
loop_
    _atom_site_aniso_label
    _atom_site_aniso_U_11
    _atom_site_aniso_U_22
    _atom_site_aniso_U_33
    _atom_site_aniso_U_23
    _atom_site_aniso_U_13
    _atom_site_aniso_U_12
C1 0.017(2) 0.033(3) 0.023(2) -0.0040(19) 0.0035(17) -0.0005(18)
C2 0.024(2) 0.040(3) 0.023(2) 0.003(2) 0.0105(18) -0.001(2)
C3 0.029(2) 0.044(3) 0.031(3) 0.000(2) 0.012(2) -0.007(2)
C4 0.038(3) 0.050(3) 0.037(3) 0.009(3) 0.014(2) -0.011(2)
C5 0.048(3) 0.074(4) 0.032(3) 0.016(3) 0.011(2) -0.012(3)
C6 0.045(3) 0.072(4) 0.029(3) 0.012(3) -0.002(2) -0.022(3)
C7 0.028(2) 0.059(4) 0.025(2) 0.006(2) 0.007(2) -0.010(2)
C8 0.033(3) 0.066(4) 0.021(2) 0.000(2) 0.000(2) -0.022(3)
C9 0.025(2) 0.062(4) 0.026(3) -0.016(2) 0.001(2) -0.013(2)
C10 0.017(2) 0.022(2) 0.019(2) 0.0013(17) -0.0005(16) -0.0034(17)
C11 0.026(2) 0.029(2) 0.021(2) -0.0018(19) 0.0067(18) -0.0007(19)
C12 0.038(3) 0.034(3) 0.032(3) -0.009(2) 0.015(2) -0.005(2)
C13 0.050(3) 0.033(3) 0.041(3) -0.015(2) 0.023(3) -0.001(2)
C14 0.033(3) 0.049(3) 0.052(3) -0.019(3) 0.018(2) 0.006(2)
C15 0.024(2) 0.049(3) 0.045(3) -0.013(3) 0.010(2) -0.003(2)
C16 0.025(2) 0.027(2) 0.026(2) -0.0056(19) 0.0091(18) -0.0008(18)
C17 0.019(2) 0.036(3) 0.035(3) -0.007(2) 0.0077(19) -0.0063(19)
C18 0.018(2) 0.022(2) 0.030(2) -0.0015(19) -0.0020(17) 0.0011(18)
C19 0.017(2) 0.035(3) 0.031(2) -0.005(2) -0.0034(18) 0.0009(19)
C20 0.028(3) 0.034(3) 0.048(3) -0.011(2) -0.001(2) 0.003(2)
C21 0.051(3) 0.039(3) 0.055(4) -0.005(3) 0.006(3) 0.013(3)
C22 0.051(4) 0.026(3) 0.069(4) -0.009(3) -0.013(3) 0.005(3)
C23 0.044(3) 0.040(3) 0.049(3) 0.007(3) -0.004(3) -0.009(3)
C24 0.028(2) 0.029(3) 0.041(3) -0.002(2) -0.004(2) -0.003(2)
C25 0.027(2) 0.060(4) 0.032(3) -0.010(3) 0.010(2) 0.007(2)
C26 0.038(3) 0.069(4) 0.038(3) -0.008(3) 0.009(2) 0.010(3)
C27 0.043(3) 0.069(4) 0.039(3) -0.017(3) 0.012(3) 0.003(3)
C28 0.034(3) 0.040(3) 0.048(3) -0.001(3) -0.006(2) 0.006(2)
C29 0.020(2) 0.044(3) 0.038(3) -0.009(2) -0.001(2) 0.004(2)
C30 0.023(2) 0.021(2) 0.045(3) 0.000(2) -0.012(2) -0.0009(19)
C31 0.033(3) 0.037(3) 0.049(3) 0.004(3) 0.005(2) 0.004(2)
C32 0.034(3) 0.030(3) 0.054(3) 0.012(3) 0.000(2) 0.004(2)
C33 0.026(3) 0.060(4) 0.046(3) 0.016(3) 0.010(2) -0.006(2)
C34 0.020(2) 0.030(3) 0.043(3) 0.006(2) 0.000(2) -0.0056(19)
C35 0.016(3) 0.025(3) 0.022(3) 0 0.000(2) 0
N1 0.0165(17) 0.032(2) 0.0211(18) -0.0003(16) 0.0008(14) -0.0016(15)
N2 0.025(2) 0.052(3) 0.0197(19) 0.0044(18) 0.0014(16) -0.0130(19)
N3 0.0167(17) 0.024(2) 0.0264(19) -0.0017(15) 0.0054(14) -0.0043(14)
N4 0.0162(17) 0.026(2) 0.0274(19) -0.0028(16) 0.0043(15) -0.0016(15)
N5 0.0187(18) 0.029(2) 0.030(2) 0.0019(17) -0.0025(16) -0.0027(16)
N6 0.0181(18) 0.038(2) 0.032(2) -0.0075(19) -0.0064(16) 0.0031(17)
O1 0.0186(15) 0.0216(16) 0.0274(16) -0.0004(13) -0.0056(13) 0.0010(12)
F7 0.0287(13) 0.0235(14) 0.0347(15) -0.0034(11) 0.0090(11) 0.0003(11)
F8 0.0411(16) 0.0267(15) 0.0370(15) -0.0025(12) 0.0139(13) 0.0066(12)
F9 0.0249(14) 0.0376(16) 0.0337(15) 0.0026(12) 0.0015(12) 0.0006(12)
P1 0.0158(5) 0.0275(6) 0.0243(6) -0.0050(5) 0.0004(4) -0.0015(4)
P3 0.0231(8) 0.0187(8) 0.0274(8) 0 0.0033(7) 0
Ru1 0.01365(16) 0.02266(19) 0.02162(18) -0.00199(15) -0.00083(12) 0.00068(14)
C36 0.121(12) 0.069(7) 0.073(5) 0.001(5) 0.046(13) -0.028(7)
Cl1 0.103(5) 0.093(5) 0.064(3) 0.000(3) 0.042(6) -0.006(7)
Cl2 0.0736(19) 0.076(2) 0.084(2) -0.0104(16) 0.0386(16) 0.0026(15)
C36B 0.121(12) 0.069(7) 0.073(5) 0.001(5) 0.046(13) -0.028(7)
Cl1B 0.103(5) 0.093(5) 0.064(3) 0.000(3) 0.042(6) -0.006(7)
Cl2B 0.049(3) 0.102(5) 0.100(5) -0.004(4) 0.014(3) -0.016(3)
P2 0.0259(6) 0.0613(10) 0.0356(7) -0.0067(7) 0.0115(5) -0.0015(6)
F2 0.0311(16) 0.061(2) 0.062(2) -0.0122(17) 0.0140(15) -0.0010(15)
F4 0.0337(17) 0.081(3) 0.064(2) -0.0172(19) 0.0208(16) -0.0152(17)
F5 0.0450(19) 0.100(3) 0.067(2) -0.037(2) 0.0344(18) -0.024(2)
F1 0.056(2) 0.064(2) 0.068(2) 0.0095(19) 0.0265(18) 0.0127(18)
F3 0.053(2) 0.085(3) 0.052(2) 0.013(2) 0.0084(17) -0.007(2)
F6 0.0374(17) 0.077(2) 0.0501(19) -0.0065(18) 0.0194(15) 0.0099(16)
 
 
#----------------------------------------------------------------------------#
#                   MOLECULAR GEOMETRY                                       #
#----------------------------------------------------------------------------#
 
_geom_special_details
;
 All s.u.'s (except the s.u. in the dihedral angle between two l.s. planes)
 are estimated using the full covariance matrix.  The cell s.u.'s are taken
 into account individually in the estimation of s.u.'s in distances, angles
 and torsion angles; correlations between s.u.'s in cell parameters are only
 used when they are defined by crystal symmetry.  An approximate (isotropic)
 treatment of cell s.u.'s is used for estimating s.u.'s involving l.s. planes.
;
loop_
    _geom_bond_atom_site_label_1
    _geom_bond_atom_site_label_2
    _geom_bond_distance
    _geom_bond_site_symmetry_2
    _geom_bond_publ_flag
C1 N1 1.356(6) . ?
C1 N2 1.367(6) . ?
C1 Ru1 2.017(5) . ?
C2 C7 1.384(7) . ?
C2 N1 1.384(6) . ?
C2 C3 1.387(7) . ?
C3 C4 1.393(7) . ?
C3 H3 0.95 . ?
C4 C5 1.401(8) . ?
C4 H4 0.95 . ?
C5 C6 1.380(8) . ?
C5 H5 0.95 . ?
C6 C7 1.393(7) . ?
C6 H6 0.95 . ?
C7 N2 1.413(7) . ?
C8 N2 1.466(6) . ?
C8 C9 1.516(8) . ?
C8 H8A 0.99 . ?
C8 H8B 0.99 . ?
C9 P1 1.824(5) . ?
C9 H9A 0.99 . ?
C9 H9B 0.99 . ?
C10 N3 1.353(5) . ?
C10 N4 1.365(5) . ?
C10 Ru1 2.013(4) . ?
C11 N3 1.386(6) . ?
C11 C16 1.392(6) . ?
C11 C12 1.391(7) . ?
C12 C13 1.380(7) . ?
C12 H12 0.95 . ?
C13 C14 1.390(7) . ?
C13 H13 0.95 . ?
C14 C15 1.378(7) . ?
C14 H14 0.95 . ?
C15 C16 1.384(6) . ?
C15 H15 0.95 . ?
C16 N4 1.392(6) . ?
C17 N4 1.469(6) . ?
C17 C18 1.532(6) . ?
C17 H17A 0.99 . ?
C17 H17B 0.99 . ?
C18 P1 1.824(4) . ?
C18 H18A 0.99 . ?
C18 H18B 0.99 . ?
C19 C24 1.402(7) . ?
C19 C20 1.407(7) . ?
C19 P1 1.804(5) . ?
C20 C21 1.389(8) . ?
C20 H20 0.95 . ?
C21 C22 1.348(9) . ?
C21 H21 0.95 . ?
C22 C23 1.411(9) . ?
C22 H22 0.95 . ?
C23 C24 1.392(8) . ?
C23 H23 0.95 . ?
C24 H24 0.95 . ?
C25 N6 1.353(7) . ?
C25 C26 1.377(8) . ?
C25 H25 0.95 . ?
C26 C27 1.347(9) . ?
C26 H26 0.95 . ?
C27 C28 1.378(8) . ?
C27 H27 0.95 . ?
C28 C29 1.424(8) . ?
C28 H28 0.95 . ?
C29 N6 1.327(7) . ?
C29 C30 1.451(8) . ?
C30 C31 1.365(7) . ?
C30 N5 1.388(6) . ?
C31 C32 1.363(8) . ?
C31 H31 0.95 . ?
C32 C33 1.388(8) . ?
C32 H32 0.95 . ?
C33 C34 1.404(7) . ?
C33 H33 0.95 . ?
C34 N5 1.314(6) . ?
C34 H34 0.95 . ?
C35 O1 1.246(4) 2 ?
C35 O1 1.246(4) . ?
C35 H35 0.95 . ?
N1 H1 0.88 . ?
N3 H3A 0.88 . ?
N5 Ru1 2.118(4) . ?
N6 Ru1 2.131(4) . ?
O1 Ru1 2.181(3) . ?
F7 P3 1.609(3) . ?
F8 P3 1.599(3) . ?
F9 P3 1.598(2) . ?
P1 Ru1 2.2092(11) . ?
P3 F9 1.598(2) 2 ?
P3 F8 1.599(3) 2 ?
P3 F7 1.609(3) 2 ?
C36 Cl1 1.754(11) . ?
C36 Cl2 1.79(4) . ?
C36 H36A 0.99 . ?
C36 H36B 0.99 . ?
C36B Cl1B 1.759(17) . ?
C36B Cl2B 1.80(4) . ?
C36B H36C 0.99 . ?
C36B H36D 0.99 . ?
P2 F6 1.583(3) . ?
P2 F4 1.584(3) . ?
P2 F2 1.592(3) . ?
P2 F5 1.594(4) . ?
P2 F3 1.597(4) . ?
P2 F1 1.609(4) . ?
 
loop_
    _geom_angle_atom_site_label_1
    _geom_angle_atom_site_label_2
    _geom_angle_atom_site_label_3
    _geom_angle
    _geom_angle_site_symmetry_1
    _geom_angle_site_symmetry_3
    _geom_angle_publ_flag
N1 C1 N2 104.7(4) . . ?
N1 C1 Ru1 121.1(3) . . ?
N2 C1 Ru1 134.2(3) . . ?
C7 C2 N1 105.9(4) . . ?
C7 C2 C3 121.6(4) . . ?
N1 C2 C3 132.5(4) . . ?
C2 C3 C4 117.2(5) . . ?
C2 C3 H3 121.4 . . ?
C4 C3 H3 121.4 . . ?
C3 C4 C5 120.9(5) . . ?
C3 C4 H4 119.6 . . ?
C5 C4 H4 119.6 . . ?
C6 C5 C4 121.7(5) . . ?
C6 C5 H5 119.2 . . ?
C4 C5 H5 119.2 . . ?
C5 C6 C7 117.0(5) . . ?
C5 C6 H6 121.5 . . ?
C7 C6 H6 121.5 . . ?
C2 C7 C6 121.6(5) . . ?
C2 C7 N2 106.2(4) . . ?
C6 C7 N2 132.1(5) . . ?
N2 C8 C9 115.4(4) . . ?
N2 C8 H8A 108.4 . . ?
C9 C8 H8A 108.4 . . ?
N2 C8 H8B 108.4 . . ?
C9 C8 H8B 108.4 . . ?
H8A C8 H8B 107.5 . . ?
C8 C9 P1 113.3(4) . . ?
C8 C9 H9A 108.9 . . ?
P1 C9 H9A 108.9 . . ?
C8 C9 H9B 108.9 . . ?
P1 C9 H9B 108.9 . . ?
H9A C9 H9B 107.7 . . ?
N3 C10 N4 104.5(4) . . ?
N3 C10 Ru1 123.7(3) . . ?
N4 C10 Ru1 131.6(3) . . ?
N3 C11 C16 105.6(4) . . ?
N3 C11 C12 132.5(4) . . ?
C16 C11 C12 121.8(4) . . ?
C13 C12 C11 116.7(5) . . ?
C13 C12 H12 121.6 . . ?
C11 C12 H12 121.6 . . ?
C12 C13 C14 121.4(5) . . ?
C12 C13 H13 119.3 . . ?
C14 C13 H13 119.3 . . ?
C15 C14 C13 121.8(5) . . ?
C15 C14 H14 119.1 . . ?
C13 C14 H14 119.1 . . ?
C14 C15 C16 117.4(5) . . ?
C14 C15 H15 121.3 . . ?
C16 C15 H15 121.3 . . ?
C15 C16 N4 133.1(4) . . ?
C15 C16 C11 120.8(4) . . ?
N4 C16 C11 106.0(4) . . ?
N4 C17 C18 112.3(4) . . ?
N4 C17 H17A 109.2 . . ?
C18 C17 H17A 109.2 . . ?
N4 C17 H17B 109.2 . . ?
C18 C17 H17B 109.2 . . ?
H17A C17 H17B 107.9 . . ?
C17 C18 P1 113.1(3) . . ?
C17 C18 H18A 109 . . ?
P1 C18 H18A 109 . . ?
C17 C18 H18B 109 . . ?
P1 C18 H18B 109 . . ?
H18A C18 H18B 107.8 . . ?
C24 C19 C20 118.2(5) . . ?
C24 C19 P1 120.4(4) . . ?
C20 C19 P1 120.9(4) . . ?
C21 C20 C19 121.9(6) . . ?
C21 C20 H20 119.1 . . ?
C19 C20 H20 119.1 . . ?
C22 C21 C20 118.5(6) . . ?
C22 C21 H21 120.8 . . ?
C20 C21 H21 120.8 . . ?
C21 C22 C23 122.6(6) . . ?
C21 C22 H22 118.7 . . ?
C23 C22 H22 118.7 . . ?
C24 C23 C22 118.5(6) . . ?
C24 C23 H23 120.8 . . ?
C22 C23 H23 120.8 . . ?
C23 C24 C19 120.4(6) . . ?
C23 C24 H24 119.8 . . ?
C19 C24 H24 119.8 . . ?
N6 C25 C26 123.6(6) . . ?
N6 C25 H25 118.2 . . ?
C26 C25 H25 118.2 . . ?
C27 C26 C25 116.8(6) . . ?
C27 C26 H26 121.6 . . ?
C25 C26 H26 121.6 . . ?
C26 C27 C28 122.1(6) . . ?
C26 C27 H27 118.9 . . ?
C28 C27 H27 118.9 . . ?
C27 C28 C29 118.0(6) . . ?
C27 C28 H28 121 . . ?
C29 C28 H28 121 . . ?
N6 C29 C28 120.0(5) . . ?
N6 C29 C30 115.9(4) . . ?
C28 C29 C30 124.1(5) . . ?
C31 C30 N5 120.1(5) . . ?
C31 C30 C29 123.9(5) . . ?
N5 C30 C29 116.0(4) . . ?
C32 C31 C30 120.0(5) . . ?
C32 C31 H31 120 . . ?
C30 C31 H31 120 . . ?
C31 C32 C33 120.5(5) . . ?
C31 C32 H32 119.7 . . ?
C33 C32 H32 119.7 . . ?
C32 C33 C34 117.4(5) . . ?
C32 C33 H33 121.3 . . ?
C34 C33 H33 121.3 . . ?
N5 C34 C33 122.1(5) . . ?
N5 C34 H34 119 . . ?
C33 C34 H34 119 . . ?
O1 C35 O1 125.4(6) 2 . ?
O1 C35 H35 117.3 2 . ?
O1 C35 H35 117.3 . . ?
C1 N1 C2 112.6(4) . . ?
C1 N1 H1 123.7 . . ?
C2 N1 H1 123.7 . . ?
C1 N2 C7 110.5(4) . . ?
C1 N2 C8 128.3(4) . . ?
C7 N2 C8 120.8(4) . . ?
C10 N3 C11 112.4(3) . . ?
C10 N3 H3A 123.8 . . ?
C11 N3 H3A 123.8 . . ?
C10 N4 C16 111.4(4) . . ?
C10 N4 C17 125.1(4) . . ?
C16 N4 C17 123.4(4) . . ?
C34 N5 C30 119.8(4) . . ?
C34 N5 Ru1 126.1(3) . . ?
C30 N5 Ru1 113.9(3) . . ?
C29 N6 C25 119.3(5) . . ?
C29 N6 Ru1 116.1(3) . . ?
C25 N6 Ru1 124.5(4) . . ?
C35 O1 Ru1 126.5(3) . . ?
C19 P1 C18 104.4(2) . . ?
C19 P1 C9 104.8(2) . . ?
C18 P1 C9 104.2(2) . . ?
C19 P1 Ru1 115.52(14) . . ?
C18 P1 Ru1 115.80(15) . . ?
C9 P1 Ru1 110.92(16) . . ?
F9 P3 F9 179.1(2) 2 . ?
F9 P3 F8 90.69(15) 2 2 ?
F9 P3 F8 89.95(15) . 2 ?
F9 P3 F8 89.95(15) 2 . ?
F9 P3 F8 90.69(15) . . ?
F8 P3 F8 90.7(2) 2 . ?
F9 P3 F7 89.65(14) 2 . ?
F9 P3 F7 89.71(14) . . ?
F8 P3 F7 89.61(13) 2 . ?
F8 P3 F7 179.47(16) . . ?
F9 P3 F7 89.71(14) 2 2 ?
F9 P3 F7 89.65(14) . 2 ?
F8 P3 F7 179.47(16) 2 2 ?
F8 P3 F7 89.61(13) . 2 ?
F7 P3 F7 90.0(2) . 2 ?
C10 Ru1 C1 86.12(17) . . ?
C10 Ru1 N5 101.11(16) . . ?
C1 Ru1 N5 171.84(16) . . ?
C10 Ru1 N6 176.32(15) . . ?
C1 Ru1 N6 95.72(17) . . ?
N5 Ru1 N6 76.86(16) . . ?
C10 Ru1 O1 85.52(14) . . ?
C1 Ru1 O1 86.25(14) . . ?
N5 Ru1 O1 90.50(12) . . ?
N6 Ru1 O1 91.41(13) . . ?
C10 Ru1 P1 91.74(12) . . ?
C1 Ru1 P1 89.99(12) . . ?
N5 Ru1 P1 93.55(10) . . ?
N6 Ru1 P1 91.45(10) . . ?
O1 Ru1 P1 175.49(9) . . ?
Cl1 C36 Cl2 113(2) . . ?
Cl1 C36 H36A 108.9 . . ?
Cl2 C36 H36A 108.9 . . ?
Cl1 C36 H36B 108.9 . . ?
Cl2 C36 H36B 108.9 . . ?
H36A C36 H36B 107.7 . . ?
Cl1B C36B Cl2B 104(3) . . ?
Cl1B C36B H36C 111 . . ?
Cl2B C36B H36C 111 . . ?
Cl1B C36B H36D 111 . . ?
Cl2B C36B H36D 111 . . ?
H36C C36B H36D 109 . . ?
F6 P2 F4 89.27(19) . . ?
F6 P2 F2 90.67(18) . . ?
F4 P2 F2 178.8(2) . . ?
F6 P2 F5 178.5(2) . . ?
F4 P2 F5 90.37(19) . . ?
F2 P2 F5 89.73(18) . . ?
F6 P2 F3 90.0(2) . . ?
F4 P2 F3 90.0(2) . . ?
F2 P2 F3 88.9(2) . . ?
F5 P2 F3 91.5(2) . . ?
F6 P2 F1 89.9(2) . . ?
F4 P2 F1 91.5(2) . . ?
F2 P2 F1 89.6(2) . . ?
F5 P2 F1 88.6(2) . . ?
F3 P2 F1 178.5(2) . . ?
 
loop_
    _geom_torsion_atom_site_label_1
    _geom_torsion_atom_site_label_2
    _geom_torsion_atom_site_label_3
    _geom_torsion_atom_site_label_4
    _geom_torsion
    _geom_torsion_site_symmetry_1
    _geom_torsion_site_symmetry_2
    _geom_torsion_site_symmetry_3
    _geom_torsion_site_symmetry_4
    _geom_torsion_publ_flag
C7 C2 C3 C4 -0.7(7) . . . . ?
N1 C2 C3 C4 176.3(5) . . . . ?
C2 C3 C4 C5 -0.3(8) . . . . ?
C3 C4 C5 C6 0.7(10) . . . . ?
C4 C5 C6 C7 -0.2(10) . . . . ?
N1 C2 C7 C6 -176.4(5) . . . . ?
C3 C2 C7 C6 1.3(8) . . . . ?
N1 C2 C7 N2 0.6(5) . . . . ?
C3 C2 C7 N2 178.3(4) . . . . ?
C5 C6 C7 C2 -0.8(9) . . . . ?
C5 C6 C7 N2 -177.0(6) . . . . ?
N2 C8 C9 P1 -56.9(6) . . . . ?
N3 C11 C12 C13 -178.7(5) . . . . ?
C16 C11 C12 C13 0.5(7) . . . . ?
C11 C12 C13 C14 -1.1(8) . . . . ?
C12 C13 C14 C15 0.5(9) . . . . ?
C13 C14 C15 C16 0.7(9) . . . . ?
C14 C15 C16 N4 178.1(5) . . . . ?
C14 C15 C16 C11 -1.3(8) . . . . ?
N3 C11 C16 C15 -179.9(4) . . . . ?
C12 C11 C16 C15 0.7(7) . . . . ?
N3 C11 C16 N4 0.5(5) . . . . ?
C12 C11 C16 N4 -178.8(4) . . . . ?
N4 C17 C18 P1 -63.7(5) . . . . ?
C24 C19 C20 C21 -0.1(7) . . . . ?
P1 C19 C20 C21 -172.2(4) . . . . ?
C19 C20 C21 C22 1.4(8) . . . . ?
C20 C21 C22 C23 -1.6(9) . . . . ?
C21 C22 C23 C24 0.5(8) . . . . ?
C22 C23 C24 C19 0.8(7) . . . . ?
C20 C19 C24 C23 -1.0(7) . . . . ?
P1 C19 C24 C23 171.1(4) . . . . ?
N6 C25 C26 C27 -1.2(8) . . . . ?
C25 C26 C27 C28 1.4(8) . . . . ?
C26 C27 C28 C29 0.2(8) . . . . ?
C27 C28 C29 N6 -2.1(7) . . . . ?
C27 C28 C29 C30 177.3(5) . . . . ?
N6 C29 C30 C31 -179.1(4) . . . . ?
C28 C29 C30 C31 1.5(7) . . . . ?
N6 C29 C30 N5 2.4(6) . . . . ?
C28 C29 C30 N5 -177.1(4) . . . . ?
N5 C30 C31 C32 3.0(7) . . . . ?
C29 C30 C31 C32 -175.5(5) . . . . ?
C30 C31 C32 C33 0.7(8) . . . . ?
C31 C32 C33 C34 -3.2(8) . . . . ?
C32 C33 C34 N5 2.1(7) . . . . ?
N2 C1 N1 C2 -3.6(5) . . . . ?
Ru1 C1 N1 C2 175.2(3) . . . . ?
C7 C2 N1 C1 1.9(5) . . . . ?
C3 C2 N1 C1 -175.5(5) . . . . ?
N1 C1 N2 C7 3.9(5) . . . . ?
Ru1 C1 N2 C7 -174.6(4) . . . . ?
N1 C1 N2 C8 177.3(5) . . . . ?
Ru1 C1 N2 C8 -1.2(8) . . . . ?
C2 C7 N2 C1 -2.9(6) . . . . ?
C6 C7 N2 C1 173.7(6) . . . . ?
C2 C7 N2 C8 -176.8(5) . . . . ?
C6 C7 N2 C8 -0.3(9) . . . . ?
C9 C8 N2 C1 27.1(8) . . . . ?
C9 C8 N2 C7 -160.1(5) . . . . ?
N4 C10 N3 C11 2.2(5) . . . . ?
Ru1 C10 N3 C11 -172.9(3) . . . . ?
C16 C11 N3 C10 -1.8(5) . . . . ?
C12 C11 N3 C10 177.5(5) . . . . ?
N3 C10 N4 C16 -1.9(5) . . . . ?
Ru1 C10 N4 C16 172.7(3) . . . . ?
N3 C10 N4 C17 175.5(4) . . . . ?
Ru1 C10 N4 C17 -10.0(7) . . . . ?
C15 C16 N4 C10 -178.6(5) . . . . ?
C11 C16 N4 C10 0.8(5) . . . . ?
C15 C16 N4 C17 4.0(8) . . . . ?
C11 C16 N4 C17 -176.6(4) . . . . ?
C18 C17 N4 C10 56.1(6) . . . . ?
C18 C17 N4 C16 -126.8(4) . . . . ?
C33 C34 N5 C30 1.5(6) . . . . ?
C33 C34 N5 Ru1 -173.7(3) . . . . ?
C31 C30 N5 C34 -4.2(6) . . . . ?
C29 C30 N5 C34 174.5(4) . . . . ?
C31 C30 N5 Ru1 171.6(3) . . . . ?
C29 C30 N5 Ru1 -9.8(5) . . . . ?
C28 C29 N6 C25 2.3(7) . . . . ?
C30 C29 N6 C25 -177.2(4) . . . . ?
C28 C29 N6 Ru1 -174.2(3) . . . . ?
C30 C29 N6 Ru1 6.3(5) . . . . ?
C26 C25 N6 C29 -0.7(7) . . . . ?
C26 C25 N6 Ru1 175.6(4) . . . . ?
O1 C35 O1 Ru1 174.6(3) 2 . . . ?
C24 C19 P1 C18 40.3(4) . . . . ?
C20 C19 P1 C18 -147.8(4) . . . . ?
C24 C19 P1 C9 149.6(4) . . . . ?
C20 C19 P1 C9 -38.5(4) . . . . ?
C24 C19 P1 Ru1 -88.0(4) . . . . ?
C20 C19 P1 Ru1 83.9(4) . . . . ?
C17 C18 P1 C19 -94.9(4) . . . . ?
C17 C18 P1 C9 155.4(3) . . . . ?
C17 C18 P1 Ru1 33.3(4) . . . . ?
C8 C9 P1 C19 -174.6(3) . . . . ?
C8 C9 P1 C18 -65.2(4) . . . . ?
C8 C9 P1 Ru1 60.1(4) . . . . ?
N3 C10 Ru1 C1 67.5(4) . . . . ?
N4 C10 Ru1 C1 -106.2(4) . . . . ?
N3 C10 Ru1 N5 -108.7(3) . . . . ?
N4 C10 Ru1 N5 77.7(4) . . . . ?
N3 C10 Ru1 N6 -53(3) . . . . ?
N4 C10 Ru1 N6 134(3) . . . . ?
N3 C10 Ru1 O1 -19.1(3) . . . . ?
N4 C10 Ru1 O1 167.3(4) . . . . ?
N3 C10 Ru1 P1 157.3(3) . . . . ?
N4 C10 Ru1 P1 -16.3(4) . . . . ?
N1 C1 Ru1 C10 -81.1(4) . . . . ?
N2 C1 Ru1 C10 97.3(5) . . . . ?
N1 C1 Ru1 N5 71.4(13) . . . . ?
N2 C1 Ru1 N5 -110.3(11) . . . . ?
N1 C1 Ru1 N6 95.7(4) . . . . ?
N2 C1 Ru1 N6 -85.9(5) . . . . ?
N1 C1 Ru1 O1 4.7(3) . . . . ?
N2 C1 Ru1 O1 -177.0(5) . . . . ?
N1 C1 Ru1 P1 -172.8(3) . . . . ?
N2 C1 Ru1 P1 5.5(5) . . . . ?
C34 N5 Ru1 C10 2.0(4) . . . . ?
C30 N5 Ru1 C10 -173.4(3) . . . . ?
C34 N5 Ru1 C1 -149.9(10) . . . . ?
C30 N5 Ru1 C1 34.6(13) . . . . ?
C34 N5 Ru1 N6 -174.8(4) . . . . ?
C30 N5 Ru1 N6 9.7(3) . . . . ?
C34 N5 Ru1 O1 -83.5(4) . . . . ?
C30 N5 Ru1 O1 101.0(3) . . . . ?
C34 N5 Ru1 P1 94.5(4) . . . . ?
C30 N5 Ru1 P1 -81.0(3) . . . . ?
C29 N6 Ru1 C10 -66(3) . . . . ?
C25 N6 Ru1 C10 118(3) . . . . ?
C29 N6 Ru1 C1 174.7(3) . . . . ?
C25 N6 Ru1 C1 -1.7(4) . . . . ?
C29 N6 Ru1 N5 -8.8(3) . . . . ?
C25 N6 Ru1 N5 174.9(4) . . . . ?
C29 N6 Ru1 O1 -98.9(3) . . . . ?
C25 N6 Ru1 O1 84.7(4) . . . . ?
C29 N6 Ru1 P1 84.6(3) . . . . ?
C25 N6 Ru1 P1 -91.8(4) . . . . ?
C35 O1 Ru1 C10 -129.1(3) . . . . ?
C35 O1 Ru1 C1 144.5(3) . . . . ?
C35 O1 Ru1 N5 -28.0(3) . . . . ?
C35 O1 Ru1 N6 48.8(3) . . . . ?
C35 O1 Ru1 P1 18E1(2) . . . . ?
C19 P1 Ru1 C10 124.8(2) . . . . ?
C18 P1 Ru1 C10 2.4(2) . . . . ?
C9 P1 Ru1 C10 -116.1(2) . . . . ?
C19 P1 Ru1 C1 -149.1(2) . . . . ?
C18 P1 Ru1 C1 88.5(2) . . . . ?
C9 P1 Ru1 C1 -30.0(2) . . . . ?
C19 P1 Ru1 N5 23.6(2) . . . . ?
C18 P1 Ru1 N5 -98.9(2) . . . . ?
C9 P1 Ru1 N5 142.7(2) . . . . ?
C19 P1 Ru1 N6 -53.4(2) . . . . ?
C18 P1 Ru1 N6 -175.8(2) . . . . ?
C9 P1 Ru1 N6 65.7(2) . . . . ?
C19 P1 Ru1 O1 18E1(2) . . . . ?
C18 P1 Ru1 O1 54.9(12) . . . . ?
C9 P1 Ru1 O1 -63.6(12) . . . . ?
# SQUEEZE RESULTS (APPEND TO CIF)
# Note: Data are Listed for all Voids in the P1 Unit Cell
# i.e. Centre of Gravity, Solvent Accessible Volume,
# Recovered number of Electrons in the Void and
# Details about the Squeezed Material
loop_
  _platon_squeeze_void_nr
  _platon_squeeze_void_average_x
  _platon_squeeze_void_average_y
  _platon_squeeze_void_average_z
  _platon_squeeze_void_volume
  _platon_squeeze_void_count_electrons
  _platon_squeeze_void_content
   1  0.250  0.250  1.000        83        26 ' '
   2  0.750  0.250  0.500        83        26 ' '
   3  0.250  0.750  0.500        83        26 ' '
   4  0.750  0.750  1.000        83        26 ' '
_platon_squeeze_details
;
;
  
# END of CIF

#\#CIF_1.1
 
#  CIF produced by WinGX routine CIF_UPDATE
#  Created on 2016-06-22 at 15:10:24
#  Using CIFtbx version 2.6.2 16 Jun 1998
 
#  Dictionary name : cif_core.dic
#  Dictionary vers : 2.4
#  Request file    : c:\wingx\files\archive.reqdat
#  CIF files read  : mn_carbamate_0ma struct
 
#------------------ SECTION 1. GLOBAL INFORMATION ---------------------------#
 
data_global
 
#------------------ AUDIT DETAILS -------------------------------------------#
 
_audit_creation_date            2016-06-22
_audit_creation_method          'WinGX routine CIF_UPDATE'
_audit_conform_dict_name        cif_core.dic
_audit_conform_dict_version     2.4
_audit_conform_dict_location    ftp://ftp.iucr.org/pub/cif_core.dic
_audit_update_record            ?
 
#------------------ AUTHOR DETAILS -------------------------------------------#
 
# Name and address of author for correspondence
 
_publ_contact_author_name      'Werner Kaminsky'
_publ_contact_author_address
;
Department of Chemistry
University of Washington
Seattle
Washington, 98195, USA
;
_publ_contact_author_email       kaminsky@chem.washington.edu
_publ_contact_author_fax         '00(206)6858665'
_publ_contact_author_phone       '00(206)5437585'
 
 
_publ_requested_journal 'Journal title here'
_publ_section_title
;
title here
;
 
loop_
_publ_author_name
_publ_author_address
'Michael Norris'
;
Department of Chemistry Univ. of Washington Seattle, WA 98195 USA
;
'Sarah Flowers'
;
Department of Chemistry Univ. of Washington Seattle, WA 98195 USA
;
'Werner Kaminsky'
;
Department of Chemistry Univ. of Washington Seattle, WA 98195 USA
;
'Brandi Cossairt'
;
Department of Chemistry Univ. of Washington Seattle, WA 98195 USA
;
 
_publ_section_abstract
;
Abstract here
;
_publ_section_comment
;
Details and comments here
;
 
_publ_section_exptl_prep
;
details of preparation here
;
 
_publ_section_exptl_refinement
;
 All H atoms were initially located in a difference Fourier map and were
 refined with a riding  model. H atoms were placed in geometrically
 idealised positions and constrained to ride on their parent atoms with
 C---H distances in the range 0.95-1.00 \%A. U~iso~ values were fixed
 such that they were 1.2U~eq~ of their parent atom U~eq~ for CH's and
 1.5U~eq~ of their parent atom U~eq~ in case of methyl groups.
;
 
 
# Insert blank lines between references
 
_publ_section_references
;
 
 
Bruker (2007) APEX2 (Version 2.1-4), SAINT (version 7.34A), SADABS
(version 2007/4), BrukerAXS Inc, Madison, Wisconsin, USA.
 
Flack H. D. & Bernardinelli, G. (71999). Acta Cryst. A55, 908-915.
 
Flack H. D. & Bernardinelli, G. (2000). J. Appl. Cryst. 33, 1143-1148.
 
Cambridge Structural Database: Allen, F. R. (2002). Acta Cryst. B58, 380-388.
 
CrysAlis CCD, CrysAlis RED and associated programs: Oxford Diffraction (2006).
Program name(s). Oxford Diffraction Ltd, Abingdon, England.
 
COLLECT: Nonius [or Hooft, R. W. W.] (1998). COLLECT. Nonius BV, Delft,
The Netherlands.
 
DENZO/SCALEPACK:  Otwinowski, Z. & Minor, W. (1997). Methods in Enzymology,
Vol. 276, Macromolecular Crystallography, Part A, edited by C. W. Carter Jr
& R. M. Sweet, pp. 307-326. New York: Academic Press.
 
DIRDIF99: Beurskens, P.T., Beurskens, G., de Gelder, R., Garci\'ia-Granda,
S., Gould, R.O., Israel, R. & Smits, J.M.M. (1999) The DIRDIF-99 program
system, Technical Report of the Crystallography Laboratory, University of
Nijmegen, The Netherlands.
 
ORTEP-3: Farrugia, L. J. (1997). J. Appl. Cryst. 30, 565.
 
PARST: Nardelli, M. (1995). J. Appl. Cryst. 28, 659.
 
PLATON: Spek, A. L. (2003). J. Appl. Cryst. 36, 7-13.
 
publCIF: Westrip, S. P. (2008). publCIF. In preparation.
 
SADABS, TWINABS: Bruker (2001). Program name. Bruker AXS Inc., Madison,
Wisconsin, USA. or Sheldrick, G. M. (1996). Program name. University of
G�ttingen, Germany.
 
SHELX Sheldrick, G. M. (2008). Acta Cryst. A64, 112-122.
 
SIR97: Altomare, A., Burla, M. C., Camalli, M., Cascarano, G. L.,
Giacovazzo, C., Guagliardi, A., Moliterni, A. G. G., Polidori, G. &
Spagna, R. (1999). J. Appl. Cryst. 32, 115-119.
 
SIR2002: Burla, M. C., Camalli, M., Carrozzini, B., Cascarano, G. L.,
Giacovazzo, C., Polidori, G. & Spagna, R. (2003). J. Appl. Cryst. 36, 1103.
 
WinGX: Farrugia, L. J. (1999). J. Appl. Cryst. 32, 837-838.
;
 
#------------------  SECTION 2. COMPOUND(S) DETAILS -------------------------#
 
data_mn_carbamate_0ma
 
_audit_creation_date                    2016-06-22T15:10:24-00:00
_audit_creation_method                  'WinGX routine CIF_UPDATE'
_audit_conform_dict_name                cif_core.dic
_audit_conform_dict_version             2.4
_audit_conform_dict_location            ftp://ftp.iucr.org/pub/cif_core.dic
_publ_requested_category                FM
 
#----------------------------------------------------------------------------#
#                   CHEMICAL INFORMATION                                     #
#----------------------------------------------------------------------------#
 
_chemical_name_systematic
;
 mn_carbamate_0ma
;
_chemical_name_common                   mn_carbamate
_chemical_formula_moiety                'C35 H30 N6 O2 P Ru, F6 P, 2(C2 H6 O S)'
_chemical_formula_sum                   'C39 H42 F6 N6 O4 P2 Ru S2'
_chemical_formula_weight                999.92
_chemical_compound_source               'synthesis as described'
 
#----------------------------------------------------------------------------#
#                   UNIT CELL INFORMATION                                    #
#----------------------------------------------------------------------------#
 
_symmetry_cell_setting                  monoclinic
_symmetry_space_group_name_H-M          'P 1 21/c 1'
_symmetry_space_group_name_Hall         '-P 2ybc'
_symmetry_Int_Tables_number             14
loop_
    _symmetry_equiv_pos_as_xyz
'x, y, z'
'-x, y+1/2, -z+1/2'
'-x, -y, -z'
'x, -y-1/2, z-1/2'
 
_cell_length_a                          12.7105(10)
_cell_length_b                          25.453(2)
_cell_length_c                          12.5290(9)
_cell_angle_alpha                       90
_cell_angle_beta                        94.334(4)
_cell_angle_gamma                       90
_cell_volume                            4041.8(5)
_cell_formula_units_Z                   4
_cell_measurement_temperature           100(2)
_cell_measurement_reflns_used           8457
_cell_measurement_theta_min             3
_cell_measurement_theta_max             20
_cell_measurement_wavelength            0.71073
 
#----------------------------------------------------------------------------#
#                   CRYSTAL INFORMATION                                      #
#----------------------------------------------------------------------------#
 
_exptl_crystal_description              piece
_exptl_crystal_colour                   yellow
_exptl_crystal_size_max                 0.15
_exptl_crystal_size_mid                 0.08
_exptl_crystal_size_min                 0.03
_exptl_crystal_density_diffrn           1.643
_exptl_crystal_density_method           'not measured'
_exptl_crystal_F_000                    2040
_exptl_special_details
;
 10 seconds, 0.5 degrees, 40.00 mm, 100 K
;
 
#----------------------------------------------------------------------------#
#                   ABSORPTION CORRECTION                                    #
#----------------------------------------------------------------------------#
 
_exptl_absorpt_coefficient_mu           0.649
_exptl_absorpt_correction_type          multi-scan
_exptl_absorpt_process_details          '(SADABS; Bruker, 2007)'
_exptl_absorpt_correction_T_min   0.9090
_exptl_absorpt_correction_T_max   0.9808

 
#----------------------------------------------------------------------------#
#                   DATA COLLECTION                                          #
#----------------------------------------------------------------------------#
 
_diffrn_ambient_temperature             100(2)
_diffrn_radiation_wavelength            0.71073
_diffrn_radiation_type                  MoK\a
_diffrn_source                          'fine-focus sealed tube'
_diffrn_radiation_monochromator         graphite
_diffrn_radiation_probe                 x-ray
_diffrn_measurement_device_type         'Bruker APEXII CCD area-detector'
_diffrn_measurement_method              '\f and \w scans'
_diffrn_reflns_av_R_equivalents         0.0817
_diffrn_reflns_av_unetI/netI            0.0438
_diffrn_reflns_number                   117733
_diffrn_reflns_limit_h_min              -15
_diffrn_reflns_limit_h_max              16
_diffrn_reflns_limit_k_min              -31
_diffrn_reflns_limit_k_max              32
_diffrn_reflns_limit_l_min              -15
_diffrn_reflns_limit_l_max              15
_diffrn_reflns_theta_min                1.6
_diffrn_reflns_theta_max                26.76
_diffrn_reflns_theta_full               25
_diffrn_measured_fraction_theta_full
                                        1
_diffrn_measured_fraction_theta_max
                                        0.983
_reflns_number_total                    8457
_reflns_number_gt                       6495
_reflns_threshold_expression            >2\s(I)
 
#----------------------------------------------------------------------------#
#                   COMPUTER PROGRAMS USED                                   #
#----------------------------------------------------------------------------#
 
_computing_data_collection              'APEX2 (Bruker, 2007)'
_computing_cell_refinement              'SAINT (Bruker, 2007)'
_computing_data_reduction               'SAINT (Bruker, 2007)'
_computing_structure_solution           'SHELXS97 (Sheldrick, 1997)'
_computing_structure_refinement         'SHELXL-97 (Sheldrick, 2008)'
_computing_molecular_graphics           'Ortep-3 for Windows (Farrugia, 1997)'
_computing_publication_material
                                   'WinGX publication routines (Farrugia, 1999)'
 
#----------------------------------------------------------------------------#
#                   STRUCTURE SOLUTION
#----------------------------------------------------------------------------#
 
_atom_sites_solution_primary            direct
_atom_sites_solution_secondary          difmap
_atom_sites_solution_hydrogens          geom
 
#----------------------------------------------------------------------------#
#                   REFINEMENT INFORMATION                                   #
#----------------------------------------------------------------------------#
 
_refine_special_details
;
 Refinement of F^2^ against ALL reflections.  The weighted R-factor wR and
 goodness of fit S are based on F^2^, conventional R-factors R are based
 on F, with F set to zero for negative F^2^. The threshold expression of
 F^2^ > 2\s(F^2^) is used only for calculating R-factors(gt) etc. and is
 not relevant to the choice of reflections for refinement.  R-factors based
 on F^2^ are statistically about twice as large as those based on F, and R-
 factors based on ALL data will be even larger.
;
_refine_ls_structure_factor_coef        Fsqd
_refine_ls_matrix_type                  full
_refine_ls_weighting_scheme             calc
_refine_ls_weighting_details
        'calc w=1/[\s^2^(Fo^2^)+(0.0666P)^2^+11.0031P] where P=(Fo^2^+2Fc^2^)/3'
_refine_ls_hydrogen_treatment           mixed
_refine_ls_extinction_method            none
_refine_ls_number_reflns                8457
_refine_ls_number_parameters            545
_refine_ls_number_restraints            0
_refine_ls_R_factor_all                 0.0702
_refine_ls_R_factor_gt                  0.049
_refine_ls_wR_factor_ref                0.1387
_refine_ls_wR_factor_gt                 0.1255
_refine_ls_goodness_of_fit_ref          1.048
_refine_ls_restrained_S_all             1.048
_refine_ls_shift/su_max                 0
_refine_ls_shift/su_mean                0
_refine_diff_density_max                0.982
_refine_diff_density_min                -1.115
_refine_diff_density_rms                0.114
 
#----------------------------------------------------------------------------#
#                   ATOMIC TYPES, COORDINATES AND THERMAL PARAMETERS         #
#----------------------------------------------------------------------------#
 
loop_
    _atom_type_symbol
    _atom_type_description
    _atom_type_scat_dispersion_real
    _atom_type_scat_dispersion_imag
    _atom_type_scat_source
C C 0.0033 0.0016 'International Tables Vol C Tables 4.2.6.8 and 6.1.1.4'
H H 0 0 'International Tables Vol C Tables 4.2.6.8 and 6.1.1.4'
N N 0.0061 0.0033 'International Tables Vol C Tables 4.2.6.8 and 6.1.1.4'
O O 0.0106 0.006 'International Tables Vol C Tables 4.2.6.8 and 6.1.1.4'
F F 0.0171 0.0103 'International Tables Vol C Tables 4.2.6.8 and 6.1.1.4'
P P 0.1023 0.0942 'International Tables Vol C Tables 4.2.6.8 and 6.1.1.4'
S S 0.1246 0.1234 'International Tables Vol C Tables 4.2.6.8 and 6.1.1.4'
Ru Ru -1.2594 0.8363 'International Tables Vol C Tables 4.2.6.8 and 6.1.1.4'
 
loop_
    _atom_site_label
    _atom_site_type_symbol
    _atom_site_fract_x
    _atom_site_fract_y
    _atom_site_fract_z
    _atom_site_U_iso_or_equiv
    _atom_site_adp_type
    _atom_site_occupancy
    _atom_site_symmetry_multiplicity
    _atom_site_calc_flag
    _atom_site_refinement_flags
    _atom_site_disorder_assembly
    _atom_site_disorder_group
C1 C 0.6595(3) 0.16371(15) 0.1792(3) 0.0172(8) Uani 1 1 d . . .
C2 C 0.7613(3) 0.14954(16) 0.3352(3) 0.0218(8) Uani 1 1 d . . .
C3 C 0.8072(3) 0.13152(17) 0.4317(3) 0.0269(9) Uani 1 1 d . . .
H3 H 0.7766 0.1038 0.4697 0.032 Uiso 1 1 calc R . .
C4 C 0.8999(4) 0.15562(19) 0.4705(4) 0.0314(10) Uani 1 1 d . . .
H4 H 0.9332 0.1443 0.5369 0.038 Uiso 1 1 calc R . .
C5 C 0.9456(3) 0.1959(2) 0.4152(3) 0.0312(10) Uani 1 1 d . . .
H5 H 1.0092 0.2115 0.4447 0.037 Uiso 1 1 calc R . .
C6 C 0.9002(3) 0.21388(18) 0.3175(3) 0.0266(9) Uani 1 1 d . . .
H6 H 0.9315 0.2412 0.2791 0.032 Uiso 1 1 calc R . .
C7 C 0.8066(3) 0.18980(16) 0.2789(3) 0.0209(8) Uani 1 1 d . . .
C8 C 0.7587(3) 0.23820(16) 0.1046(3) 0.0237(9) Uani 1 1 d . . .
H8A H 0.8309 0.2526 0.1176 0.028 Uiso 1 1 calc R . .
H8B H 0.7082 0.2673 0.1126 0.028 Uiso 1 1 calc R . .
C9 C 0.7443(3) 0.21689(16) -0.0096(3) 0.0206(8) Uani 1 1 d . . .
H9A H 0.7927 0.1868 -0.0165 0.025 Uiso 1 1 calc R . .
H9B H 0.7641 0.2446 -0.0599 0.025 Uiso 1 1 calc R . .
C10 C 0.4396(3) 0.19458(15) 0.1135(3) 0.0184(8) Uani 1 1 d . . .
C11 C 0.3013(3) 0.22657(16) 0.1978(3) 0.0236(9) Uani 1 1 d . . .
C12 C 0.2212(3) 0.23626(18) 0.2664(4) 0.0280(9) Uani 1 1 d . . .
H12 H 0.2116 0.2145 0.3266 0.034 Uiso 1 1 calc R . .
C13 C 0.1569(3) 0.27913(19) 0.2418(4) 0.0308(10) Uani 1 1 d . . .
H13 H 0.1029 0.2875 0.2874 0.037 Uiso 1 1 calc R . .
C14 C 0.1689(3) 0.31019(18) 0.1525(4) 0.0306(10) Uani 1 1 d . . .
H14 H 0.1227 0.3391 0.1385 0.037 Uiso 1 1 calc R . .
C15 C 0.2466(3) 0.30019(17) 0.0830(3) 0.0269(9) Uani 1 1 d . . .
H15 H 0.2543 0.3211 0.0214 0.032 Uiso 1 1 calc R . .
C16 C 0.3126(3) 0.25762(16) 0.1091(3) 0.0210(8) Uani 1 1 d . . .
C17 C 0.4230(3) 0.25445(17) -0.0483(3) 0.0241(9) Uani 1 1 d . . .
H17A H 0.39 0.2892 -0.0631 0.029 Uiso 1 1 calc R . .
H17B H 0.3908 0.2293 -0.1016 0.029 Uiso 1 1 calc R . .
C18 C 0.5400(3) 0.25853(15) -0.0629(3) 0.0215(8) Uani 1 1 d . . .
H18A H 0.5723 0.2838 -0.0101 0.026 Uiso 1 1 calc R . .
H18B H 0.5495 0.2725 -0.1353 0.026 Uiso 1 1 calc R . .
C19 C 0.6141(3) 0.16922(15) -0.1821(3) 0.0194(8) Uani 1 1 d . . .
C20 C 0.7001(3) 0.13970(16) -0.2106(3) 0.0250(9) Uani 1 1 d . . .
H20 H 0.7614 0.1371 -0.1625 0.03 Uiso 1 1 calc R . .
C21 C 0.6969(4) 0.11405(18) -0.3087(3) 0.0296(10) Uani 1 1 d . . .
H21 H 0.7565 0.0946 -0.3278 0.035 Uiso 1 1 calc R . .
C22 C 0.6072(4) 0.11670(17) -0.3789(3) 0.0271(9) Uani 1 1 d . . .
H22 H 0.6049 0.0987 -0.4455 0.032 Uiso 1 1 calc R . .
C23 C 0.5211(3) 0.14575(16) -0.3514(3) 0.0242(9) Uani 1 1 d . . .
H23 H 0.4594 0.1478 -0.3991 0.029 Uiso 1 1 calc R . .
C24 C 0.5253(3) 0.17180(16) -0.2540(3) 0.0230(9) Uani 1 1 d . . .
H24 H 0.4661 0.1919 -0.236 0.028 Uiso 1 1 calc R . .
C25 C 0.7372(3) 0.06617(16) 0.0465(3) 0.0212(8) Uani 1 1 d . . .
H25 H 0.7734 0.0876 0.0995 0.025 Uiso 1 1 calc R . .
C26 C 0.7902(3) 0.02418(17) 0.0052(3) 0.0276(9) Uani 1 1 d . . .
H26 H 0.8621 0.0176 0.0276 0.033 Uiso 1 1 calc R . .
C27 C 0.7366(3) -0.00815(17) -0.0695(4) 0.0285(10) Uani 1 1 d . . .
H27 H 0.7705 -0.0379 -0.0974 0.034 Uiso 1 1 calc R . .
C28 C 0.6334(3) 0.00337(16) -0.1029(3) 0.0236(9) Uani 1 1 d . . .
H28 H 0.5955 -0.0184 -0.154 0.028 Uiso 1 1 calc R . .
C29 C 0.5852(3) 0.04679(15) -0.0617(3) 0.0187(8) Uani 1 1 d . . .
C30 C 0.4770(3) 0.06309(15) -0.0965(3) 0.0190(8) Uani 1 1 d . . .
C31 C 0.4184(3) 0.03899(16) -0.1813(3) 0.0258(9) Uani 1 1 d . . .
H31 H 0.4474 0.0107 -0.219 0.031 Uiso 1 1 calc R . .
C32 C 0.3182(4) 0.05655(18) -0.2097(4) 0.0298(10) Uani 1 1 d . . .
H32 H 0.2778 0.041 -0.2684 0.036 Uiso 1 1 calc R . .
C33 C 0.2767(3) 0.09651(17) -0.1532(4) 0.0281(9) Uani 1 1 d . . .
H33 H 0.2068 0.1085 -0.171 0.034 Uiso 1 1 calc R . .
C34 C 0.3382(3) 0.11930(16) -0.0699(3) 0.0221(8) Uani 1 1 d . . .
H34 H 0.3089 0.1469 -0.0306 0.027 Uiso 1 1 calc R . .
C35 C 0.5938(4) 0.09280(18) 0.2848(3) 0.0287(10) Uani 1 1 d . . .
C36 C 0.3714(6) 0.0314(2) 0.4521(6) 0.0663(18) Uani 1 1 d . . .
H36A H 0.445 0.0292 0.434 0.099 Uiso 1 1 calc R . .
H36B H 0.3388 -0.0034 0.4454 0.099 Uiso 1 1 calc R . .
H36C H 0.3692 0.044 0.5258 0.099 Uiso 1 1 calc R . .
C37 C 0.1816(5) 0.0788(3) 0.4290(7) 0.085(3) Uani 1 1 d . . .
H37A H 0.1961 0.0938 0.5007 0.127 Uiso 1 1 calc R . .
H37B H 0.1529 0.0433 0.4351 0.127 Uiso 1 1 calc R . .
H37C H 0.1302 0.1009 0.3876 0.127 Uiso 1 1 calc R . .
C38 C -0.0244(8) 0.0392(4) 0.7988(6) 0.106(3) Uani 1 1 d . . .
H38A H -0.059 0.0723 0.8151 0.16 Uiso 1 1 calc R . .
H38B H 0.0382 0.0343 0.8484 0.16 Uiso 1 1 calc R . .
H38C H -0.0735 0.01 0.8066 0.16 Uiso 1 1 calc R . .
C39 C 0.0718(5) -0.0221(2) 0.6698(5) 0.0604(16) Uani 1 1 d . . .
H39A H 0.0215 -0.0484 0.6917 0.091 Uiso 1 1 calc R . .
H39B H 0.1347 -0.0223 0.7201 0.091 Uiso 1 1 calc R . .
H39C H 0.0921 -0.0303 0.5977 0.091 Uiso 1 1 calc R . .
N1 N 0.6702(3) 0.13456(13) 0.2721(3) 0.0207(7) Uani 1 1 d . . .
N2 N 0.7419(3) 0.19769(13) 0.1849(2) 0.0188(7) Uani 1 1 d . . .
N3 N 0.3807(3) 0.18884(13) 0.1989(3) 0.0214(7) Uani 1 1 d . . .
H3A H 0.3913 0.1645 0.2484 0.026 Uiso 1 1 calc R . .
N4 N 0.3986(3) 0.23726(13) 0.0594(3) 0.0211(7) Uani 1 1 d . . .
N5 N 0.6366(3) 0.07783(12) 0.0145(2) 0.0179(7) Uani 1 1 d . . .
N6 N 0.4380(3) 0.10388(12) -0.0421(3) 0.0187(7) Uani 1 1 d . . .
O1 O 0.5173(2) 0.09103(11) 0.2098(2) 0.0271(7) Uani 1 1 d . . .
O2 O 0.6080(3) 0.06329(13) 0.3622(3) 0.0385(8) Uani 1 1 d . . .
O3 O 0.3529(3) 0.12850(13) 0.3814(3) 0.0417(8) Uani 1 1 d . . .
O4 O -0.0881(4) 0.03883(17) 0.6014(3) 0.0634(12) Uani 1 1 d . . .
F1 F 1.1153(3) 0.1577(2) -0.0163(4) 0.0899(14) Uani 1 1 d . . .
F2 F 0.9432(3) 0.13589(14) -0.0329(3) 0.0616(10) Uani 1 1 d . . .
F3 F 1.0607(3) 0.07587(15) 0.0282(4) 0.0840(14) Uani 1 1 d . . .
F4 F 1.1251(3) 0.13129(14) 0.1550(3) 0.0638(10) Uani 1 1 d . . .
F5 F 0.9538(3) 0.11240(17) 0.1409(3) 0.0779(12) Uani 1 1 d . . .
F6 F 1.0064(3) 0.19249(13) 0.0944(3) 0.0552(8) Uani 1 1 d . . .
P1 P 0.60929(8) 0.19567(4) -0.04693(8) 0.0164(2) Uani 1 1 d . . .
P2 P 1.03524(10) 0.13472(5) 0.06169(11) 0.0384(3) Uani 1 1 d . . .
S1 S 0.30106(12) 0.07601(5) 0.36286(11) 0.0448(3) Uani 1 1 d . . .
S2 S 0.01265(13) 0.04080(6) 0.66942(13) 0.0526(4) Uani 1 1 d . . .
Ru1 Ru 0.54733(2) 0.141701(12) 0.07124(2) 0.01555(10) Uani 1 1 d . . .
 
loop_
    _atom_site_aniso_label
    _atom_site_aniso_U_11
    _atom_site_aniso_U_22
    _atom_site_aniso_U_33
    _atom_site_aniso_U_23
    _atom_site_aniso_U_13
    _atom_site_aniso_U_12
C1 0.0185(19) 0.0169(19) 0.0167(18) 0.0003(15) 0.0045(15) 0.0028(15)
C2 0.020(2) 0.028(2) 0.0176(19) -0.0051(16) 0.0028(16) 0.0053(17)
C3 0.030(2) 0.030(2) 0.020(2) -0.0015(17) 0.0012(17) 0.0072(18)
C4 0.032(2) 0.039(3) 0.022(2) -0.0029(19) -0.0032(19) 0.012(2)
C5 0.021(2) 0.044(3) 0.028(2) -0.012(2) -0.0048(18) 0.006(2)
C6 0.018(2) 0.035(2) 0.026(2) -0.0056(18) 0.0033(17) 0.0009(18)
C7 0.0169(19) 0.030(2) 0.0160(19) -0.0068(16) 0.0012(15) 0.0044(16)
C8 0.024(2) 0.021(2) 0.025(2) 0.0006(17) 0.0018(17) -0.0068(17)
C9 0.018(2) 0.025(2) 0.019(2) 0.0030(16) 0.0029(15) -0.0037(16)
C10 0.0182(19) 0.021(2) 0.0157(18) -0.0031(15) 0.0002(15) -0.0035(16)
C11 0.019(2) 0.026(2) 0.025(2) -0.0066(17) 0.0009(16) -0.0005(17)
C12 0.022(2) 0.033(2) 0.029(2) -0.0047(19) 0.0044(18) -0.0039(18)
C13 0.017(2) 0.041(3) 0.035(3) -0.015(2) 0.0058(18) -0.0013(19)
C14 0.023(2) 0.031(2) 0.037(3) -0.009(2) -0.0020(19) 0.0070(19)
C15 0.022(2) 0.030(2) 0.028(2) -0.0025(18) -0.0018(17) 0.0077(18)
C16 0.0166(19) 0.025(2) 0.021(2) -0.0062(16) 0.0023(15) 0.0011(16)
C17 0.027(2) 0.023(2) 0.023(2) 0.0003(17) 0.0027(17) 0.0101(17)
C18 0.028(2) 0.0159(19) 0.021(2) -0.0001(15) 0.0041(16) 0.0015(16)
C19 0.023(2) 0.018(2) 0.0181(19) 0.0040(15) 0.0047(16) 0.0002(16)
C20 0.026(2) 0.028(2) 0.020(2) 0.0017(17) 0.0018(17) 0.0077(18)
C21 0.036(3) 0.031(2) 0.023(2) -0.0015(18) 0.0071(19) 0.014(2)
C22 0.040(3) 0.026(2) 0.016(2) -0.0034(17) 0.0053(18) 0.0028(19)
C23 0.028(2) 0.026(2) 0.0184(19) 0.0009(17) 0.0003(17) 0.0004(18)
C24 0.023(2) 0.022(2) 0.025(2) 0.0007(16) 0.0054(17) 0.0009(17)
C25 0.021(2) 0.020(2) 0.023(2) -0.0008(16) 0.0002(16) 0.0021(16)
C26 0.024(2) 0.028(2) 0.031(2) 0.0029(18) 0.0001(18) 0.0094(18)
C27 0.030(2) 0.021(2) 0.035(2) -0.0025(18) 0.0067(19) 0.0069(18)
C28 0.027(2) 0.019(2) 0.026(2) -0.0035(16) 0.0038(17) 0.0034(17)
C29 0.022(2) 0.0160(19) 0.0181(19) 0.0008(15) 0.0030(15) -0.0016(15)
C30 0.023(2) 0.0157(19) 0.0187(19) 0.0026(15) 0.0036(15) -0.0023(15)
C31 0.030(2) 0.021(2) 0.027(2) -0.0047(17) 0.0035(18) -0.0023(18)
C32 0.030(2) 0.028(2) 0.030(2) -0.0037(18) -0.0062(19) -0.0054(19)
C33 0.020(2) 0.029(2) 0.034(2) 0.0051(19) -0.0038(18) -0.0012(18)
C34 0.021(2) 0.0174(19) 0.028(2) 0.0010(16) 0.0026(17) -0.0018(16)
C35 0.034(3) 0.030(2) 0.023(2) -0.0007(18) 0.0039(19) 0.0012(19)
C36 0.068(4) 0.043(3) 0.087(5) 0.021(3) 0.002(4) -0.001(3)
C37 0.052(4) 0.060(4) 0.147(8) -0.017(5) 0.038(5) -0.019(3)
C38 0.125(8) 0.137(8) 0.058(5) -0.017(5) 0.009(5) 0.055(7)
C39 0.064(4) 0.052(4) 0.063(4) -0.004(3) -0.004(3) 0.012(3)
N1 0.0233(18) 0.0212(18) 0.0177(16) -0.0008(13) 0.0024(13) 0.0014(14)
N2 0.0179(16) 0.0225(17) 0.0158(16) -0.0018(13) 0.0005(13) -0.0009(13)
N3 0.0193(17) 0.0244(18) 0.0209(17) 0.0005(14) 0.0039(14) -0.0024(14)
N4 0.0207(17) 0.0226(18) 0.0206(17) -0.0015(14) 0.0052(14) 0.0057(14)
N5 0.0208(17) 0.0164(16) 0.0168(16) 0.0017(13) 0.0026(13) 0.0001(13)
N6 0.0207(17) 0.0170(16) 0.0185(16) 0.0022(13) 0.0023(13) -0.0001(13)
O1 0.0358(17) 0.0239(15) 0.0212(15) -0.0015(12) 0.0002(13) -0.0027(13)
O2 0.050(2) 0.0364(19) 0.0281(17) 0.0044(14) 0.0001(15) -0.0036(16)
O3 0.050(2) 0.0302(18) 0.046(2) -0.0023(15) 0.0130(17) -0.0067(16)
O4 0.074(3) 0.060(3) 0.053(2) -0.003(2) -0.016(2) 0.023(2)
F1 0.060(2) 0.132(4) 0.082(3) 0.004(3) 0.037(2) 0.006(2)
F2 0.055(2) 0.062(2) 0.064(2) -0.0212(17) -0.0203(17) 0.0285(17)
F3 0.075(3) 0.063(2) 0.106(3) -0.040(2) -0.046(2) 0.038(2)
F4 0.055(2) 0.056(2) 0.075(2) -0.0097(18) -0.0255(18) 0.0024(17)
F5 0.065(2) 0.085(3) 0.085(3) 0.009(2) 0.013(2) -0.025(2)
F6 0.060(2) 0.0447(18) 0.060(2) -0.0134(16) 0.0028(17) 0.0039(16)
P1 0.0177(5) 0.0160(5) 0.0158(5) 0.0010(4) 0.0027(4) 0.0011(4)
P2 0.0256(6) 0.0406(8) 0.0486(8) -0.0086(6) 0.0003(6) 0.0066(5)
S1 0.0568(9) 0.0356(7) 0.0421(7) -0.0061(6) 0.0045(6) -0.0071(6)
S2 0.0543(9) 0.0441(8) 0.0602(9) -0.0006(7) 0.0089(7) 0.0047(7)
Ru1 0.01590(17) 0.01539(17) 0.01545(16) 0.00012(12) 0.00180(11) 0.00002(12)
 
 
#----------------------------------------------------------------------------#
#                   MOLECULAR GEOMETRY                                       #
#----------------------------------------------------------------------------#
 
_geom_special_details
;
 All s.u.'s (except the s.u. in the dihedral angle between two l.s. planes)
 are estimated using the full covariance matrix.  The cell s.u.'s are taken
 into account individually in the estimation of s.u.'s in distances, angles
 and torsion angles; correlations between s.u.'s in cell parameters are only
 used when they are defined by crystal symmetry.  An approximate (isotropic)
 treatment of cell s.u.'s is used for estimating s.u.'s involving l.s. planes.
;
loop_
    _geom_bond_atom_site_label_1
    _geom_bond_atom_site_label_2
    _geom_bond_distance
    _geom_bond_site_symmetry_2
    _geom_bond_publ_flag
C1 N2 1.357(5) . ?
C1 N1 1.378(5) . ?
C1 Ru1 1.971(4) . ?
C2 C3 1.381(6) . ?
C2 C7 1.393(6) . ?
C2 N1 1.404(5) . ?
C3 C4 1.383(7) . ?
C3 H3 0.95 . ?
C4 C5 1.389(7) . ?
C4 H4 0.95 . ?
C5 C6 1.390(6) . ?
C5 H5 0.95 . ?
C6 C7 1.392(6) . ?
C6 H6 0.95 . ?
C7 N2 1.399(5) . ?
C8 N2 1.467(5) . ?
C8 C9 1.528(5) . ?
C8 H8A 0.99 . ?
C8 H8B 0.99 . ?
C9 P1 1.827(4) . ?
C9 H9A 0.99 . ?
C9 H9B 0.99 . ?
C10 N3 1.360(5) . ?
C10 N4 1.363(5) . ?
C10 Ru1 2.019(4) . ?
C11 C16 1.380(6) . ?
C11 N3 1.392(5) . ?
C11 C12 1.403(6) . ?
C12 C13 1.384(6) . ?
C12 H12 0.95 . ?
C13 C14 1.387(7) . ?
C13 H13 0.95 . ?
C14 C15 1.388(6) . ?
C14 H14 0.95 . ?
C15 C16 1.394(6) . ?
C15 H15 0.95 . ?
C16 N4 1.398(5) . ?
C17 N4 1.473(5) . ?
C17 C18 1.516(6) . ?
C17 H17A 0.99 . ?
C17 H17B 0.99 . ?
C18 P1 1.830(4) . ?
C18 H18A 0.99 . ?
C18 H18B 0.99 . ?
C19 C24 1.392(6) . ?
C19 C20 1.395(6) . ?
C19 P1 1.828(4) . ?
C20 C21 1.390(6) . ?
C20 H20 0.95 . ?
C21 C22 1.388(6) . ?
C21 H21 0.95 . ?
C22 C23 1.386(6) . ?
C22 H22 0.95 . ?
C23 C24 1.386(6) . ?
C23 H23 0.95 . ?
C24 H24 0.95 . ?
C25 N5 1.344(5) . ?
C25 C26 1.385(6) . ?
C25 H25 0.95 . ?
C26 C27 1.386(6) . ?
C26 H26 0.95 . ?
C27 C28 1.378(6) . ?
C27 H27 0.95 . ?
C28 C29 1.382(5) . ?
C28 H28 0.95 . ?
C29 N5 1.368(5) . ?
C29 C30 1.469(6) . ?
C30 N6 1.356(5) . ?
C30 C31 1.394(6) . ?
C31 C32 1.371(6) . ?
C31 H31 0.95 . ?
C32 C33 1.367(6) . ?
C32 H32 0.95 . ?
C33 C34 1.383(6) . ?
C33 H33 0.95 . ?
C34 N6 1.348(5) . ?
C34 H34 0.95 . ?
C35 O2 1.228(5) . ?
C35 O1 1.301(5) . ?
C35 N1 1.457(6) . ?
C36 S1 1.785(6) . ?
C36 H36A 0.98 . ?
C36 H36B 0.98 . ?
C36 H36C 0.98 . ?
C37 S1 1.786(7) . ?
C37 H37A 0.98 . ?
C37 H37B 0.98 . ?
C37 H37C 0.98 . ?
C38 S2 1.722(8) . ?
C38 H38A 0.98 . ?
C38 H38B 0.98 . ?
C38 H38C 0.98 . ?
C39 S2 1.768(6) . ?
C39 H39A 0.98 . ?
C39 H39B 0.98 . ?
C39 H39C 0.98 . ?
N3 H3A 0.88 . ?
N5 Ru1 2.135(3) . ?
N6 Ru1 2.139(3) . ?
O1 Ru1 2.219(3) . ?
O3 S1 1.500(4) . ?
O4 S2 1.485(4) . ?
F1 P2 1.576(4) . ?
F2 P2 1.601(3) . ?
F3 P2 1.595(4) . ?
F4 P2 1.574(3) . ?
F5 P2 1.592(4) . ?
F6 P2 1.577(3) . ?
P1 Ru1 2.2080(10) . ?
 
loop_
    _geom_angle_atom_site_label_1
    _geom_angle_atom_site_label_2
    _geom_angle_atom_site_label_3
    _geom_angle
    _geom_angle_site_symmetry_1
    _geom_angle_site_symmetry_3
    _geom_angle_publ_flag
N2 C1 N1 105.8(3) . . ?
N2 C1 Ru1 137.1(3) . . ?
N1 C1 Ru1 116.5(3) . . ?
C3 C2 C7 121.6(4) . . ?
C3 C2 N1 132.7(4) . . ?
C7 C2 N1 105.7(3) . . ?
C2 C3 C4 116.9(4) . . ?
C2 C3 H3 121.5 . . ?
C4 C3 H3 121.5 . . ?
C3 C4 C5 122.0(4) . . ?
C3 C4 H4 119 . . ?
C5 C4 H4 119 . . ?
C4 C5 C6 121.4(4) . . ?
C4 C5 H5 119.3 . . ?
C6 C5 H5 119.3 . . ?
C5 C6 C7 116.6(4) . . ?
C5 C6 H6 121.7 . . ?
C7 C6 H6 121.7 . . ?
C6 C7 C2 121.6(4) . . ?
C6 C7 N2 131.4(4) . . ?
C2 C7 N2 107.0(3) . . ?
N2 C8 C9 112.3(3) . . ?
N2 C8 H8A 109.1 . . ?
C9 C8 H8A 109.1 . . ?
N2 C8 H8B 109.1 . . ?
C9 C8 H8B 109.1 . . ?
H8A C8 H8B 107.9 . . ?
C8 C9 P1 112.8(3) . . ?
C8 C9 H9A 109 . . ?
P1 C9 H9A 109 . . ?
C8 C9 H9B 109 . . ?
P1 C9 H9B 109 . . ?
H9A C9 H9B 107.8 . . ?
N3 C10 N4 105.3(3) . . ?
N3 C10 Ru1 124.0(3) . . ?
N4 C10 Ru1 130.0(3) . . ?
C16 C11 N3 106.5(3) . . ?
C16 C11 C12 121.1(4) . . ?
N3 C11 C12 132.4(4) . . ?
C13 C12 C11 116.5(4) . . ?
C13 C12 H12 121.8 . . ?
C11 C12 H12 121.8 . . ?
C12 C13 C14 122.0(4) . . ?
C12 C13 H13 119 . . ?
C14 C13 H13 119 . . ?
C13 C14 C15 121.8(4) . . ?
C13 C14 H14 119.1 . . ?
C15 C14 H14 119.1 . . ?
C14 C15 C16 116.1(4) . . ?
C14 C15 H15 122 . . ?
C16 C15 H15 122 . . ?
C11 C16 C15 122.5(4) . . ?
C11 C16 N4 106.2(3) . . ?
C15 C16 N4 131.3(4) . . ?
N4 C17 C18 114.1(3) . . ?
N4 C17 H17A 108.7 . . ?
C18 C17 H17A 108.7 . . ?
N4 C17 H17B 108.7 . . ?
C18 C17 H17B 108.7 . . ?
H17A C17 H17B 107.6 . . ?
C17 C18 P1 113.3(3) . . ?
C17 C18 H18A 108.9 . . ?
P1 C18 H18A 108.9 . . ?
C17 C18 H18B 108.9 . . ?
P1 C18 H18B 108.9 . . ?
H18A C18 H18B 107.7 . . ?
C24 C19 C20 118.2(4) . . ?
C24 C19 P1 120.0(3) . . ?
C20 C19 P1 121.1(3) . . ?
C21 C20 C19 120.5(4) . . ?
C21 C20 H20 119.7 . . ?
C19 C20 H20 119.7 . . ?
C22 C21 C20 120.4(4) . . ?
C22 C21 H21 119.8 . . ?
C20 C21 H21 119.8 . . ?
C23 C22 C21 119.6(4) . . ?
C23 C22 H22 120.2 . . ?
C21 C22 H22 120.2 . . ?
C24 C23 C22 119.7(4) . . ?
C24 C23 H23 120.1 . . ?
C22 C23 H23 120.1 . . ?
C23 C24 C19 121.5(4) . . ?
C23 C24 H24 119.2 . . ?
C19 C24 H24 119.2 . . ?
N5 C25 C26 122.5(4) . . ?
N5 C25 H25 118.7 . . ?
C26 C25 H25 118.7 . . ?
C25 C26 C27 118.8(4) . . ?
C25 C26 H26 120.6 . . ?
C27 C26 H26 120.6 . . ?
C28 C27 C26 119.1(4) . . ?
C28 C27 H27 120.4 . . ?
C26 C27 H27 120.4 . . ?
C27 C28 C29 119.7(4) . . ?
C27 C28 H28 120.1 . . ?
C29 C28 H28 120.1 . . ?
N5 C29 C28 121.4(4) . . ?
N5 C29 C30 115.5(3) . . ?
C28 C29 C30 123.1(4) . . ?
N6 C30 C31 121.7(4) . . ?
N6 C30 C29 115.9(3) . . ?
C31 C30 C29 122.4(4) . . ?
C32 C31 C30 119.2(4) . . ?
C32 C31 H31 120.4 . . ?
C30 C31 H31 120.4 . . ?
C33 C32 C31 119.7(4) . . ?
C33 C32 H32 120.2 . . ?
C31 C32 H32 120.2 . . ?
C32 C33 C34 119.0(4) . . ?
C32 C33 H33 120.5 . . ?
C34 C33 H33 120.5 . . ?
N6 C34 C33 122.7(4) . . ?
N6 C34 H34 118.7 . . ?
C33 C34 H34 118.7 . . ?
O2 C35 O1 127.3(4) . . ?
O2 C35 N1 118.2(4) . . ?
O1 C35 N1 114.5(4) . . ?
S1 C36 H36A 109.5 . . ?
S1 C36 H36B 109.5 . . ?
H36A C36 H36B 109.5 . . ?
S1 C36 H36C 109.5 . . ?
H36A C36 H36C 109.5 . . ?
H36B C36 H36C 109.5 . . ?
S1 C37 H37A 109.5 . . ?
S1 C37 H37B 109.5 . . ?
H37A C37 H37B 109.5 . . ?
S1 C37 H37C 109.5 . . ?
H37A C37 H37C 109.5 . . ?
H37B C37 H37C 109.5 . . ?
S2 C38 H38A 109.5 . . ?
S2 C38 H38B 109.5 . . ?
H38A C38 H38B 109.5 . . ?
S2 C38 H38C 109.5 . . ?
H38A C38 H38C 109.5 . . ?
H38B C38 H38C 109.5 . . ?
S2 C39 H39A 109.5 . . ?
S2 C39 H39B 109.5 . . ?
H39A C39 H39B 109.5 . . ?
S2 C39 H39C 109.5 . . ?
H39A C39 H39C 109.5 . . ?
H39B C39 H39C 109.5 . . ?
C1 N1 C2 110.7(3) . . ?
C1 N1 C35 117.5(3) . . ?
C2 N1 C35 131.7(3) . . ?
C1 N2 C7 110.8(3) . . ?
C1 N2 C8 124.3(3) . . ?
C7 N2 C8 124.9(3) . . ?
C10 N3 C11 111.1(3) . . ?
C10 N3 H3A 124.4 . . ?
C11 N3 H3A 124.4 . . ?
C10 N4 C16 110.9(3) . . ?
C10 N4 C17 126.3(3) . . ?
C16 N4 C17 121.6(3) . . ?
C25 N5 C29 118.4(3) . . ?
C25 N5 Ru1 125.9(3) . . ?
C29 N5 Ru1 115.7(3) . . ?
C34 N6 C30 117.8(3) . . ?
C34 N6 Ru1 126.3(3) . . ?
C30 N6 Ru1 115.7(3) . . ?
C35 O1 Ru1 112.4(3) . . ?
C9 P1 C19 104.46(18) . . ?
C9 P1 C18 101.81(19) . . ?
C19 P1 C18 105.66(18) . . ?
C9 P1 Ru1 112.85(13) . . ?
C19 P1 Ru1 115.51(13) . . ?
C18 P1 Ru1 115.11(13) . . ?
F4 P2 F1 90.8(2) . . ?
F4 P2 F6 91.66(19) . . ?
F1 P2 F6 89.4(2) . . ?
F4 P2 F5 89.3(2) . . ?
F1 P2 F5 179.1(3) . . ?
F6 P2 F5 89.8(2) . . ?
F4 P2 F3 89.62(19) . . ?
F1 P2 F3 91.8(3) . . ?
F6 P2 F3 178.2(2) . . ?
F5 P2 F3 89.0(3) . . ?
F4 P2 F2 177.9(2) . . ?
F1 P2 F2 90.2(2) . . ?
F6 P2 F2 90.20(18) . . ?
F5 P2 F2 89.7(2) . . ?
F3 P2 F2 88.50(18) . . ?
O3 S1 C36 106.0(3) . . ?
O3 S1 C37 105.8(3) . . ?
C36 S1 C37 97.9(4) . . ?
O4 S2 C38 104.7(4) . . ?
O4 S2 C39 108.6(3) . . ?
C38 S2 C39 97.0(4) . . ?
C1 Ru1 C10 95.74(15) . . ?
C1 Ru1 N5 94.00(14) . . ?
C10 Ru1 N5 169.44(14) . . ?
C1 Ru1 N6 169.56(14) . . ?
C10 Ru1 N6 93.12(14) . . ?
N5 Ru1 N6 76.80(12) . . ?
C1 Ru1 P1 90.42(11) . . ?
C10 Ru1 P1 92.53(11) . . ?
N5 Ru1 P1 91.44(9) . . ?
N6 Ru1 P1 94.68(9) . . ?
C1 Ru1 O1 77.67(13) . . ?
C10 Ru1 O1 91.27(13) . . ?
N5 Ru1 O1 86.85(11) . . ?
N6 Ru1 O1 96.67(11) . . ?
P1 Ru1 O1 167.81(8) . . ?
 
loop_
    _geom_torsion_atom_site_label_1
    _geom_torsion_atom_site_label_2
    _geom_torsion_atom_site_label_3
    _geom_torsion_atom_site_label_4
    _geom_torsion
    _geom_torsion_site_symmetry_1
    _geom_torsion_site_symmetry_2
    _geom_torsion_site_symmetry_3
    _geom_torsion_site_symmetry_4
    _geom_torsion_publ_flag
C7 C2 C3 C4 0.6(6) . . . . ?
N1 C2 C3 C4 179.1(4) . . . . ?
C2 C3 C4 C5 -0.4(6) . . . . ?
C3 C4 C5 C6 -0.2(7) . . . . ?
C4 C5 C6 C7 0.5(6) . . . . ?
C5 C6 C7 C2 -0.4(6) . . . . ?
C5 C6 C7 N2 -179.3(4) . . . . ?
C3 C2 C7 C6 -0.2(6) . . . . ?
N1 C2 C7 C6 -179.1(3) . . . . ?
C3 C2 C7 N2 178.9(4) . . . . ?
N1 C2 C7 N2 0.1(4) . . . . ?
N2 C8 C9 P1 64.9(4) . . . . ?
C16 C11 C12 C13 -1.7(6) . . . . ?
N3 C11 C12 C13 178.1(4) . . . . ?
C11 C12 C13 C14 1.6(6) . . . . ?
C12 C13 C14 C15 -0.4(7) . . . . ?
C13 C14 C15 C16 -0.9(6) . . . . ?
N3 C11 C16 C15 -179.3(4) . . . . ?
C12 C11 C16 C15 0.5(6) . . . . ?
N3 C11 C16 N4 0.2(4) . . . . ?
C12 C11 C16 N4 -179.9(4) . . . . ?
C14 C15 C16 C11 0.8(6) . . . . ?
C14 C15 C16 N4 -178.7(4) . . . . ?
N4 C17 C18 P1 62.4(4) . . . . ?
C24 C19 C20 C21 0.6(6) . . . . ?
P1 C19 C20 C21 171.5(3) . . . . ?
C19 C20 C21 C22 -1.2(7) . . . . ?
C20 C21 C22 C23 0.9(7) . . . . ?
C21 C22 C23 C24 -0.1(6) . . . . ?
C22 C23 C24 C19 -0.5(6) . . . . ?
C20 C19 C24 C23 0.3(6) . . . . ?
P1 C19 C24 C23 -170.7(3) . . . . ?
N5 C25 C26 C27 -2.1(6) . . . . ?
C25 C26 C27 C28 2.0(6) . . . . ?
C26 C27 C28 C29 0.1(6) . . . . ?
C27 C28 C29 N5 -2.2(6) . . . . ?
C27 C28 C29 C30 177.3(4) . . . . ?
N5 C29 C30 N6 -5.8(5) . . . . ?
C28 C29 C30 N6 174.7(4) . . . . ?
N5 C29 C30 C31 173.0(4) . . . . ?
C28 C29 C30 C31 -6.5(6) . . . . ?
N6 C30 C31 C32 -0.8(6) . . . . ?
C29 C30 C31 C32 -179.5(4) . . . . ?
C30 C31 C32 C33 -1.4(6) . . . . ?
C31 C32 C33 C34 1.6(7) . . . . ?
C32 C33 C34 N6 0.3(6) . . . . ?
N2 C1 N1 C2 -1.4(4) . . . . ?
Ru1 C1 N1 C2 171.7(2) . . . . ?
N2 C1 N1 C35 -177.2(3) . . . . ?
Ru1 C1 N1 C35 -4.0(4) . . . . ?
C3 C2 N1 C1 -177.9(4) . . . . ?
C7 C2 N1 C1 0.8(4) . . . . ?
C3 C2 N1 C35 -2.9(7) . . . . ?
C7 C2 N1 C35 175.8(4) . . . . ?
O2 C35 N1 C1 173.2(4) . . . . ?
O1 C35 N1 C1 -6.1(5) . . . . ?
O2 C35 N1 C2 -1.5(7) . . . . ?
O1 C35 N1 C2 179.3(4) . . . . ?
N1 C1 N2 C7 1.4(4) . . . . ?
Ru1 C1 N2 C7 -169.5(3) . . . . ?
N1 C1 N2 C8 -176.8(3) . . . . ?
Ru1 C1 N2 C8 12.2(6) . . . . ?
C6 C7 N2 C1 178.1(4) . . . . ?
C2 C7 N2 C1 -0.9(4) . . . . ?
C6 C7 N2 C8 -3.7(6) . . . . ?
C2 C7 N2 C8 177.3(3) . . . . ?
C9 C8 N2 C1 -46.5(5) . . . . ?
C9 C8 N2 C7 135.5(4) . . . . ?
N4 C10 N3 C11 1.5(4) . . . . ?
Ru1 C10 N3 C11 -169.9(3) . . . . ?
C16 C11 N3 C10 -1.1(4) . . . . ?
C12 C11 N3 C10 179.1(4) . . . . ?
N3 C10 N4 C16 -1.3(4) . . . . ?
Ru1 C10 N4 C16 169.3(3) . . . . ?
N3 C10 N4 C17 -169.1(4) . . . . ?
Ru1 C10 N4 C17 1.6(6) . . . . ?
C11 C16 N4 C10 0.7(4) . . . . ?
C15 C16 N4 C10 -179.8(4) . . . . ?
C11 C16 N4 C17 169.1(4) . . . . ?
C15 C16 N4 C17 -11.4(7) . . . . ?
C18 C17 N4 C10 -50.4(5) . . . . ?
C18 C17 N4 C16 143.1(4) . . . . ?
C26 C25 N5 C29 0.1(6) . . . . ?
C26 C25 N5 Ru1 -179.5(3) . . . . ?
C28 C29 N5 C25 2.2(5) . . . . ?
C30 C29 N5 C25 -177.4(3) . . . . ?
C28 C29 N5 Ru1 -178.3(3) . . . . ?
C30 C29 N5 Ru1 2.2(4) . . . . ?
C33 C34 N6 C30 -2.4(6) . . . . ?
C33 C34 N6 Ru1 171.9(3) . . . . ?
C31 C30 N6 C34 2.6(5) . . . . ?
C29 C30 N6 C34 -178.6(3) . . . . ?
C31 C30 N6 Ru1 -172.3(3) . . . . ?
C29 C30 N6 Ru1 6.6(4) . . . . ?
O2 C35 O1 Ru1 -167.4(4) . . . . ?
N1 C35 O1 Ru1 11.8(4) . . . . ?
C8 C9 P1 C19 -177.3(3) . . . . ?
C8 C9 P1 C18 72.9(3) . . . . ?
C8 C9 P1 Ru1 -51.0(3) . . . . ?
C24 C19 P1 C9 -150.2(3) . . . . ?
C20 C19 P1 C9 39.0(4) . . . . ?
C24 C19 P1 C18 -43.2(4) . . . . ?
C20 C19 P1 C18 146.0(3) . . . . ?
C24 C19 P1 Ru1 85.2(3) . . . . ?
C20 C19 P1 Ru1 -85.5(3) . . . . ?
C17 C18 P1 C9 -155.8(3) . . . . ?
C17 C18 P1 C19 95.3(3) . . . . ?
C17 C18 P1 Ru1 -33.4(3) . . . . ?
N2 C1 Ru1 C10 -92.1(4) . . . . ?
N1 C1 Ru1 C10 97.7(3) . . . . ?
N2 C1 Ru1 N5 92.0(4) . . . . ?
N1 C1 Ru1 N5 -78.3(3) . . . . ?
N2 C1 Ru1 N6 119.9(7) . . . . ?
N1 C1 Ru1 N6 -50.4(9) . . . . ?
N2 C1 Ru1 P1 0.5(4) . . . . ?
N1 C1 Ru1 P1 -169.8(3) . . . . ?
N2 C1 Ru1 O1 177.9(4) . . . . ?
N1 C1 Ru1 O1 7.6(3) . . . . ?
N3 C10 Ru1 C1 -79.3(3) . . . . ?
N4 C10 Ru1 C1 111.6(4) . . . . ?
N3 C10 Ru1 N5 78.0(8) . . . . ?
N4 C10 Ru1 N5 -91.1(8) . . . . ?
N3 C10 Ru1 N6 95.2(3) . . . . ?
N4 C10 Ru1 N6 -73.9(4) . . . . ?
N3 C10 Ru1 P1 -170.0(3) . . . . ?
N4 C10 Ru1 P1 20.9(4) . . . . ?
N3 C10 Ru1 O1 -1.6(3) . . . . ?
N4 C10 Ru1 O1 -170.7(4) . . . . ?
C25 N5 Ru1 C1 -4.6(3) . . . . ?
C29 N5 Ru1 C1 175.9(3) . . . . ?
C25 N5 Ru1 C10 -162.0(7) . . . . ?
C29 N5 Ru1 C10 18.5(9) . . . . ?
C25 N5 Ru1 N6 -179.6(3) . . . . ?
C29 N5 Ru1 N6 0.9(3) . . . . ?
C25 N5 Ru1 P1 86.0(3) . . . . ?
C29 N5 Ru1 P1 -93.6(3) . . . . ?
C25 N5 Ru1 O1 -82.0(3) . . . . ?
C29 N5 Ru1 O1 98.5(3) . . . . ?
C34 N6 Ru1 C1 152.8(7) . . . . ?
C30 N6 Ru1 C1 -32.8(9) . . . . ?
C34 N6 Ru1 C10 4.7(3) . . . . ?
C30 N6 Ru1 C10 179.1(3) . . . . ?
C34 N6 Ru1 N5 -178.5(3) . . . . ?
C30 N6 Ru1 N5 -4.1(3) . . . . ?
C34 N6 Ru1 P1 -88.1(3) . . . . ?
C30 N6 Ru1 P1 86.3(3) . . . . ?
C34 N6 Ru1 O1 96.3(3) . . . . ?
C30 N6 Ru1 O1 -89.3(3) . . . . ?
C9 P1 Ru1 C1 17.35(18) . . . . ?
C19 P1 Ru1 C1 137.43(18) . . . . ?
C18 P1 Ru1 C1 -98.93(18) . . . . ?
C9 P1 Ru1 C10 113.12(18) . . . . ?
C19 P1 Ru1 C10 -126.80(18) . . . . ?
C18 P1 Ru1 C10 -3.16(19) . . . . ?
C9 P1 Ru1 N5 -76.67(17) . . . . ?
C19 P1 Ru1 N5 43.41(17) . . . . ?
C18 P1 Ru1 N5 167.06(17) . . . . ?
C9 P1 Ru1 N6 -153.54(17) . . . . ?
C19 P1 Ru1 N6 -33.45(17) . . . . ?
C18 P1 Ru1 N6 90.19(17) . . . . ?
C9 P1 Ru1 O1 5.1(4) . . . . ?
C19 P1 Ru1 O1 125.1(4) . . . . ?
C18 P1 Ru1 O1 -111.2(4) . . . . ?
C35 O1 Ru1 C1 -11.0(3) . . . . ?
C35 O1 Ru1 C10 -106.6(3) . . . . ?
C35 O1 Ru1 N5 83.8(3) . . . . ?
C35 O1 Ru1 N6 160.1(3) . . . . ?
C35 O1 Ru1 P1 1.6(6) . . . . ?
_iucr_refine_instructions_details  
;
TITL mn_carbamate_0ma clear yellow piece in P2(1)/c by MN, struct SF & WK
CELL  0.71073  12.7105  25.4528  12.5290   90.000   94.334   90.000
ZERR     4.00   0.0010   0.0020   0.0009    0.000    0.004    0.000
LATT   1
SYMM  - X, 1/2 + Y, 1/2 - Z
SFAC  C    H    N    O    F    P    S    RU
UNIT  156  168  24   16   24   8    8    4
MERG   2
FMAP   2
PLAN   25
SIZE     0.03   0.08   0.15
ACTA    50.00
BOND   $H
CONF
WPDB  -2
L.S.   8
TEMP  -173.00
WGHT    0.066600   11.003100
FVAR       0.08442
C1    1    0.659452    0.163713    0.179226    11.00000    0.01849    0.01689 =
         0.01673    0.00026    0.00448    0.00283
C2    1    0.761275    0.149538    0.335166    11.00000    0.02013    0.02797 =
         0.01761   -0.00512    0.00283    0.00526
C3    1    0.807230    0.131521    0.431680    11.00000    0.03046    0.02990 =
         0.02014   -0.00153    0.00123    0.00722
AFIX  43
H3    2    0.776610    0.103845    0.469690    11.00000   -1.20000
AFIX   0
C4    1    0.899885    0.155622    0.470462    11.00000    0.03209    0.03917 =
         0.02213   -0.00293   -0.00321    0.01191
AFIX  43
H4    2    0.933248    0.144299    0.536904    11.00000   -1.20000
AFIX   0
C5    1    0.945610    0.195893    0.415151    11.00000    0.02070    0.04413 =
         0.02773   -0.01184   -0.00479    0.00626
AFIX  43
H5    2    1.009223    0.211466    0.444674    11.00000   -1.20000
AFIX   0
C6    1    0.900246    0.213880    0.317521    11.00000    0.01826    0.03544 =
         0.02629   -0.00556    0.00329    0.00091
AFIX  43
H6    2    0.931517    0.241205    0.279089    11.00000   -1.20000
AFIX   0
C7    1    0.806623    0.189799    0.278930    11.00000    0.01691    0.02979 =
         0.01600   -0.00680    0.00123    0.00437
C8    1    0.758662    0.238203    0.104609    11.00000    0.02449    0.02148 =
         0.02503    0.00056    0.00178   -0.00677
AFIX  23
H8A   2    0.830873    0.252577    0.117561    11.00000   -1.20000
H8B   2    0.708184    0.267306    0.112592    11.00000   -1.20000
AFIX   0
C9    1    0.744348    0.216894   -0.009604    11.00000    0.01790    0.02533 =
         0.01894    0.00296    0.00294   -0.00372
AFIX  23
H9A   2    0.792672    0.186786   -0.016527    11.00000   -1.20000
H9B   2    0.764105    0.244551   -0.059927    11.00000   -1.20000
AFIX   0
C10   1    0.439620    0.194583    0.113467    11.00000    0.01818    0.02112 =
         0.01574   -0.00315    0.00017   -0.00355
C11   1    0.301288    0.226569    0.197823    11.00000    0.01927    0.02621 =
         0.02523   -0.00655    0.00094   -0.00047
C12   1    0.221212    0.236257    0.266435    11.00000    0.02179    0.03318 =
         0.02937   -0.00475    0.00439   -0.00385
AFIX  43
H12   2    0.211629    0.214547    0.326613    11.00000   -1.20000
AFIX   0
C13   1    0.156901    0.279132    0.241791    11.00000    0.01673    0.04098 =
         0.03515   -0.01513    0.00578   -0.00132
AFIX  43
H13   2    0.102906    0.287545    0.287388    11.00000   -1.20000
AFIX   0
C14   1    0.168906    0.310194    0.152519    11.00000    0.02348    0.03082 =
         0.03672   -0.00940   -0.00201    0.00702
AFIX  43
H14   2    0.122669    0.339118    0.138540    11.00000   -1.20000
AFIX   0
C15   1    0.246602    0.300186    0.083045    11.00000    0.02216    0.02999 =
         0.02813   -0.00251   -0.00182    0.00766
AFIX  43
H15   2    0.254340    0.321126    0.021361    11.00000   -1.20000
AFIX   0
C16   1    0.312567    0.257624    0.109110    11.00000    0.01661    0.02546 =
         0.02119   -0.00619    0.00229    0.00108
C17   1    0.422985    0.254447   -0.048297    11.00000    0.02654    0.02319 =
         0.02284    0.00028    0.00267    0.01010
AFIX  23
H17A  2    0.390029    0.289189   -0.063100    11.00000   -1.20000
H17B  2    0.390849    0.229339   -0.101604    11.00000   -1.20000
AFIX   0
C18   1    0.540015    0.258531   -0.062933    11.00000    0.02772    0.01588 =
         0.02126   -0.00013    0.00408    0.00147
AFIX  23
H18A  2    0.572265    0.283843   -0.010112    11.00000   -1.20000
H18B  2    0.549522    0.272539   -0.135288    11.00000   -1.20000
AFIX   0
C19   1    0.614073    0.169221   -0.182093    11.00000    0.02281    0.01782 =
         0.01808    0.00404    0.00466    0.00017
C20   1    0.700102    0.139696   -0.210569    11.00000    0.02645    0.02806 =
         0.02040    0.00166    0.00181    0.00769
AFIX  43
H20   2    0.761355    0.137099   -0.162490    11.00000   -1.20000
AFIX   0
C21   1    0.696921    0.114054   -0.308697    11.00000    0.03570    0.03102 =
         0.02274   -0.00151    0.00713    0.01363
AFIX  43
H21   2    0.756462    0.094608   -0.327816    11.00000   -1.20000
AFIX   0
C22   1    0.607223    0.116700   -0.378925    11.00000    0.03966    0.02554 =
         0.01643   -0.00337    0.00526    0.00278
AFIX  43
H22   2    0.604889    0.098699   -0.445484    11.00000   -1.20000
AFIX   0
C23   1    0.521063    0.145753   -0.351410    11.00000    0.02814    0.02599 =
         0.01836    0.00088    0.00029    0.00044
AFIX  43
H23   2    0.459427    0.147797   -0.399084    11.00000   -1.20000
AFIX   0
C24   1    0.525254    0.171803   -0.254040    11.00000    0.02300    0.02167 =
         0.02482    0.00070    0.00542    0.00091
AFIX  43
H24   2    0.466147    0.191883   -0.235985    11.00000   -1.20000
AFIX   0
C25   1    0.737246    0.066175    0.046510    11.00000    0.02087    0.01984 =
         0.02271   -0.00078    0.00022    0.00214
AFIX  43
H25   2    0.773393    0.087571    0.099509    11.00000   -1.20000
AFIX   0
C26   1    0.790232    0.024180    0.005161    11.00000    0.02371    0.02834 =
         0.03053    0.00287    0.00012    0.00941
AFIX  43
H26   2    0.862106    0.017638    0.027593    11.00000   -1.20000
AFIX   0
C27   1    0.736575   -0.008154   -0.069544    11.00000    0.03006    0.02116 =
         0.03490   -0.00253    0.00668    0.00690
AFIX  43
H27   2    0.770525   -0.037866   -0.097381    11.00000   -1.20000
AFIX   0
C28   1    0.633352    0.003365   -0.102895    11.00000    0.02669    0.01874 =
         0.02561   -0.00349    0.00380    0.00340
AFIX  43
H28   2    0.595484   -0.018442   -0.153955    11.00000   -1.20000
AFIX   0
C29   1    0.585154    0.046789   -0.061729    11.00000    0.02212    0.01599 =
         0.01815    0.00084    0.00296   -0.00158
C30   1    0.477042    0.063090   -0.096452    11.00000    0.02293    0.01567 =
         0.01871    0.00257    0.00358   -0.00227
C31   1    0.418356    0.038989   -0.181312    11.00000    0.02956    0.02077 =
         0.02737   -0.00470    0.00351   -0.00228
AFIX  43
H31   2    0.447426    0.010745   -0.218985    11.00000   -1.20000
AFIX   0
C32   1    0.318190    0.056547   -0.209726    11.00000    0.03043    0.02787 =
         0.02969   -0.00374   -0.00620   -0.00539
AFIX  43
H32   2    0.277777    0.041029   -0.268360    11.00000   -1.20000
AFIX   0
C33   1    0.276746    0.096512   -0.153235    11.00000    0.02040    0.02940 =
         0.03359    0.00515   -0.00384   -0.00115
AFIX  43
H33   2    0.206790    0.108455   -0.170961    11.00000   -1.20000
AFIX   0
C34   1    0.338201    0.119299   -0.069879    11.00000    0.02087    0.01740 =
         0.02822    0.00101    0.00256   -0.00176
AFIX  43
H34   2    0.308894    0.146925   -0.030645    11.00000   -1.20000
AFIX   0
C35   1    0.593784    0.092795    0.284830    11.00000    0.03399    0.02955 =
         0.02279   -0.00068    0.00395    0.00115
C36   1    0.371426    0.031408    0.452051    11.00000    0.06816    0.04290 =
         0.08722    0.02088    0.00193   -0.00056
AFIX 137
H36A  2    0.444970    0.029192    0.433959    11.00000   -1.50000
H36B  2    0.338782   -0.003435    0.445389    11.00000   -1.50000
H36C  2    0.369156    0.043980    0.525773    11.00000   -1.50000
AFIX   0
C37   1    0.181588    0.078795    0.429018    11.00000    0.05161    0.06010 =
         0.14702   -0.01669    0.03756   -0.01885
AFIX 137
H37A  2    0.196067    0.093774    0.500680    11.00000   -1.50000
H37B  2    0.152933    0.043265    0.435066    11.00000   -1.50000
H37C  2    0.130192    0.100875    0.387619    11.00000   -1.50000
AFIX   0
C38   1   -0.024370    0.039175    0.798821    11.00000    0.12451    0.13670 =
         0.05825   -0.01676    0.00891    0.05493
AFIX 137
H38A  2   -0.058954    0.072333    0.815053    11.00000   -1.50000
H38B  2    0.038250    0.034284    0.848419    11.00000   -1.50000
H38C  2   -0.073470    0.009980    0.806611    11.00000   -1.50000
AFIX   0
C39   1    0.071841   -0.022061    0.669780    11.00000    0.06433    0.05189 =
         0.06345   -0.00358   -0.00447    0.01158
AFIX 137
H39A  2    0.021521   -0.048404    0.691672    11.00000   -1.50000
H39B  2    0.134713   -0.022298    0.720130    11.00000   -1.50000
H39C  2    0.092098   -0.030327    0.597739    11.00000   -1.50000
AFIX   0
N1    3    0.670161    0.134565    0.272121    11.00000    0.02326    0.02125 =
         0.01773   -0.00075    0.00240    0.00141
N2    3    0.741929    0.197687    0.184910    11.00000    0.01792    0.02247 =
         0.01582   -0.00177    0.00046   -0.00094
N3    3    0.380684    0.188840    0.198900    11.00000    0.01928    0.02436 =
         0.02089    0.00047    0.00385   -0.00242
AFIX  43
H3A   2    0.391329    0.164475    0.248371    11.00000   -1.20000
AFIX   0
N4    3    0.398550    0.237263    0.059354    11.00000    0.02072    0.02263 =
         0.02058   -0.00145    0.00520    0.00573
N5    3    0.636642    0.077826    0.014540    11.00000    0.02080    0.01637 =
         0.01683    0.00170    0.00264    0.00009
N6    3    0.437987    0.103884   -0.042082    11.00000    0.02072    0.01697 =
         0.01853    0.00216    0.00231   -0.00009
O1    4    0.517264    0.091029    0.209807    11.00000    0.03579    0.02390 =
         0.02118   -0.00146    0.00021   -0.00270
O2    4    0.607964    0.063288    0.362174    11.00000    0.05050    0.03639 =
         0.02808    0.00442    0.00013   -0.00358
O3    4    0.352915    0.128496    0.381444    11.00000    0.05014    0.03022 =
         0.04606   -0.00233    0.01299   -0.00670
O4    4   -0.088137    0.038828    0.601368    11.00000    0.07389    0.06016 =
         0.05315   -0.00308   -0.01569    0.02313
F1    5    1.115327    0.157698   -0.016347    11.00000    0.06020    0.13239 =
         0.08187    0.00365    0.03707    0.00609
F2    5    0.943217    0.135889   -0.032888    11.00000    0.05495    0.06235 =
         0.06373   -0.02125   -0.02029    0.02849
F3    5    1.060657    0.075869    0.028166    11.00000    0.07510    0.06266 =
         0.10623   -0.04000   -0.04587    0.03819
F4    5    1.125148    0.131290    0.154972    11.00000    0.05527    0.05636 =
         0.07504   -0.00969   -0.02548    0.00237
F5    5    0.953775    0.112403    0.140869    11.00000    0.06508    0.08511 =
         0.08460    0.00907    0.01276   -0.02522
F6    5    1.006384    0.192489    0.094360    11.00000    0.06021    0.04466 =
         0.06048   -0.01336    0.00283    0.00391
P1    6    0.609287    0.195670   -0.046925    11.00000    0.01770    0.01603 =
         0.01580    0.00101    0.00272    0.00112
P2    6    1.035237    0.134718    0.061695    11.00000    0.02559    0.04058 =
         0.04859   -0.00860    0.00031    0.00656
S1    7    0.301063    0.076010    0.362858    11.00000    0.05680    0.03557 =
         0.04208   -0.00609    0.00452   -0.00710
S2    7    0.012654    0.040804    0.669421    11.00000    0.05431    0.04414 =
         0.06016   -0.00063    0.00887    0.00474
RU1   8    0.547332    0.141701    0.071242    11.00000    0.01590    0.01539 =
         0.01545    0.00012    0.00180    0.00002
HKLF    4  1.0  1.00  0.00  0.00  0.00  1.00  0.00  0.00  0.00  1.00
 
REM  mn_carbamate_0ma clear yellow piece in P2(1)/c by MN, struct SF & WK
REM R1 =  0.0490 for   6495 Fo > 4sig(Fo)  and  0.0702 for all   8457 data
REM    545 parameters refined using      0 restraints
 
END
 
WGHT      0.0666     11.0206
REM Highest difference peak  0.982,  deepest hole -1.115,  1-sigma level  0.114
Q1    1  -0.0897 -0.0196  0.6968  11.00000  0.05    0.98
Q2    1   0.4551  0.1107  0.1967  11.00000  0.05    0.96
Q3    1   0.0817  0.0690  0.6486  11.00000  0.05    0.76
Q4    1   0.3955  0.1353  0.2430  11.00000  0.05    0.70
Q5    1   0.3383  0.1359  0.3008  11.00000  0.05    0.69
Q6    1  -0.0201  0.0560  0.7369  11.00000  0.05    0.64
Q7    1   0.4603  0.0768  0.3153  11.00000  0.05    0.63
Q8    1   0.0176 -0.0025  0.6945  11.00000  0.05    0.61
Q9    1   0.9865  0.1630 -0.0749  11.00000  0.05    0.60
Q10   1  -0.0116  0.1046  0.7321  11.00000  0.05    0.58
Q11   1   1.0700  0.1859  0.0380  11.00000  0.05    0.57
Q12   1   0.5147  0.1393  0.3393  11.00000  0.05    0.53
Q13   1  -0.0424  0.0364  0.7246  11.00000  0.05    0.53
Q14   1   0.9450  0.1183  0.0602  11.00000  0.05    0.47
Q15   1   0.6201  0.1740  0.1367  11.00000  0.05    0.46
Q16   1   0.5560  0.1549  0.1074  11.00000  0.05    0.46
Q17   1   0.4654  0.1734  0.0904  11.00000  0.05    0.45
Q18   1   0.1966  0.3081  0.2047  11.00000  0.05    0.44
Q19   1   0.5928  0.1415  0.0567  11.00000  0.05    0.44
Q20   1   0.5839  0.1746 -0.0058  11.00000  0.05    0.42
Q21   1   0.2984  0.0041  0.5368  11.00000  0.05    0.41
Q22   1   1.0398  0.1236  0.1679  11.00000  0.05    0.40
Q23   1  -0.0387  0.0089  0.6478  11.00000  0.05    0.39
Q24   1   0.9993  0.0902  0.1007  11.00000  0.05    0.38
Q25   1   0.6151  0.0986  0.0692  11.00000  0.05    0.38


; 
# END of CIF
